# Supplementary material for: Organocatalytic atroposelective construction of axially chiral nonsymmetric biaryltriols and their applications in asymmetric synthesis and heavy metal ion detection
Source: Royal Society of Chemistry journal article supplement (doi:10.1039/d1qo01821c), 2022-01-01
Supplement: d1qo01821c1.pdf [file d1qo01821c1.pdf]

## Organocatalytic Atroposelective Construction of Axial Chiral Nonsymmetric Biaryltriols and their Applications on Asymmetric Synthesis and Heavy Metal Ion Detection

Shiqi Jia, Wenling Qin, Pengfei Wang\* Hailong Yan\*

*Chongqing Key Laboratory of Natural Product Synthesis and Drug Research, School of Pharmaceutical Sciences, Chongqing University, Chongqing 401331, P. R. China;*

Prof. Hailong Yan: e-mail: [yhl198151@cqu.edu.cn](mailto:yhl198151@cqu.edu.cn)

Dr. Pengfei Wang: e-mail: [wangpf@cqu.edu.cn](mailto:wangpf@cqu.edu.cn)

### Supporting Information

|       |                                                                                                    |    |
|-------|----------------------------------------------------------------------------------------------------|----|
| I.    | General procedure for the synthesis of substrate <b>1a-1u</b> .....                                | 2  |
| II.   | Optimization of the reaction conditions <sup>a</sup> .....                                         | 3  |
| III.  | General procedure for the asymmetric reaction. ....                                                | 4  |
| IV.   | Racemization studies of <b>2n</b> .....                                                            | 5  |
| V.    | Application as selective fluorescence sensors toward heavy metal detectives. ....                  | 6  |
| VI.   | <sup>1</sup> H, <sup>13</sup> C NMR and HRMS data of compounds ( <b>1a-1u</b> ) .....              | 10 |
| VII.  | <sup>1</sup> H, <sup>13</sup> C NMR, HRMS data and HPLC traces of compounds ( <b>2a-2u</b> ) ..... | 17 |
| VIII. | General information .....                                                                          | 31 |
| IX.   | Scale-up experiment and transformation.....                                                        | 31 |
| X.    | Nonsymmetric axial chiral biaryltriols were used in asymmetric synthesis. ....                     | 32 |
| XI.   | <sup>1</sup> H and <sup>13</sup> C NMR spectra of substrates .....                                 | 38 |
| XII.  | X-Ray crystallographic information of <b>3a</b> .....                                              | 86 |
| XIII. | Reference.....                                                                                     | 87 |

## I. General procedure for the synthesis of substrate 1a-1u.

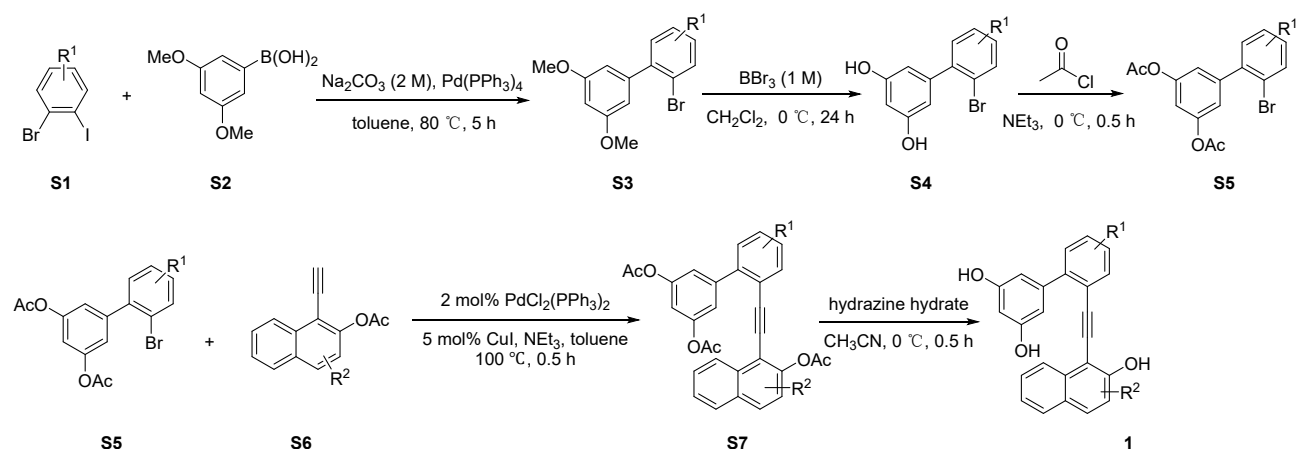

**General procedure for the synthesis of derivatives S3:** S1 (10 mmol, 1.0 equiv) were dissolved in toluene (20 mL). Then, 3,5-dimethoxyphenylboronic acid S2 (1.1 equiv) in EtOH (3 mL) and aqueous Na<sub>2</sub>CO<sub>3</sub> (2 M, 3.0 equiv) were added to each reactor, and the resulting mixtures were deoxygenated with a stream of N<sub>2</sub>. After 10 min, Pd(PPh<sub>3</sub>)<sub>4</sub> (0.02 equiv) was added, and stirred under N<sub>2</sub> at 80 °C for 5 h, cooled to room temperature, and treated as follows. Each solution was poured into a mixture of H<sub>2</sub>O and EA, and the two phases were separated. The aqueous layer was washed with EA, and the organic phases were combined and washed with 1 M NaOH followed by brine. The ethereal solution was dried over Na<sub>2</sub>SO<sub>4</sub> and evaporated. Purification of each crude product by flash chromatography using PE/EA = 95:5 yielded the corresponding S3 as colorless oil.

**General procedure for the synthesis of derivatives S4:** S3 (1 equiv) were dissolved in anhydrous CH<sub>2</sub>Cl<sub>2</sub> (30 mL) at -78 °C. Then, BBr<sub>3</sub> (1 M in CH<sub>2</sub>Cl<sub>2</sub>, 3 equiv) was added to solution, and the resulting reaction mixture was allowed to warm to room temperature for 24 h, cooled to 0 °C, and treated as follows. The CH<sub>3</sub>OH and H<sub>2</sub>O was injected into solution slowly, and the two phases were separated. The aqueous layer was washed twice with CH<sub>2</sub>Cl<sub>2</sub>, and the organic phases were combined and washed with a 1 M solution of sodium thiosulfate followed by H<sub>2</sub>O. The organic layer was dried over Na<sub>2</sub>SO<sub>4</sub> and evaporated to dryness, which was directly used without purification.

**General procedure for the synthesis of derivatives S5:** In a 100 mL Schlenk flask, S4 was dissolved in CH<sub>2</sub>Cl<sub>2</sub> (25 mL) and NEt<sub>3</sub> (3 equiv). Acetyl chloride (3 equiv) was added slowly to the solution at 0 °C, which was then stirred for 30 min at room temperature. The reaction was quenched by addition of NaHSO<sub>3</sub> solution and extracted with CH<sub>2</sub>Cl<sub>2</sub> several times. The combined organic phases were dried over Na<sub>2</sub>SO<sub>4</sub>, which was directly used without purification.

**General procedure for the synthesis of derivatives S6:** see reference 1.

**General procedure for the synthesis of derivatives S7:** To a dry flask under N<sub>2</sub> containing S5 was sequentially added Et<sub>3</sub>N (20 mL) and toluene (20 mL), PdCl<sub>2</sub>(PPh<sub>3</sub>)<sub>2</sub> (0.02 equiv), CuI (0.05 equiv), then appropriate alkynes (1.1 equiv) was injected into solution at 100 °C, The mixture was stirred for 30 minutes. Then the mixture was filtered through a pad of celite. Removal of solvent under reduced pressure afforded a residue which is purified by column chromatography on silica gel (PE/EA= 5:1) to afford S7.

**General procedure for the synthesis of derivatives 1:** Hydrazine monohydrate (4 equiv) was dropwise added to a solution of S7 in CH<sub>3</sub>CN (20 mL). After the resulted mixture was stirred at room temperature for 30 minutes, the mixture was treated with sat. aq. NH<sub>4</sub>Cl and extracted with EA and dried over Na<sub>2</sub>SO<sub>4</sub>. Removal of solvent under reduced pressure afforded a residue which is purified by column chromatography on silica gel (PE/Acetone = 2:1) to afford the compound 1.

## II. Optimization of the reaction conditions<sup>a</sup>

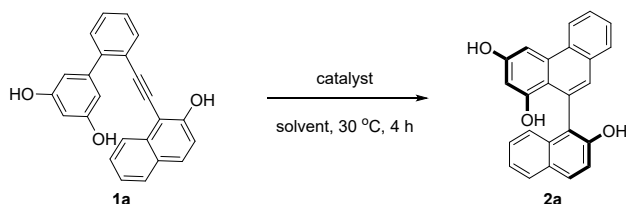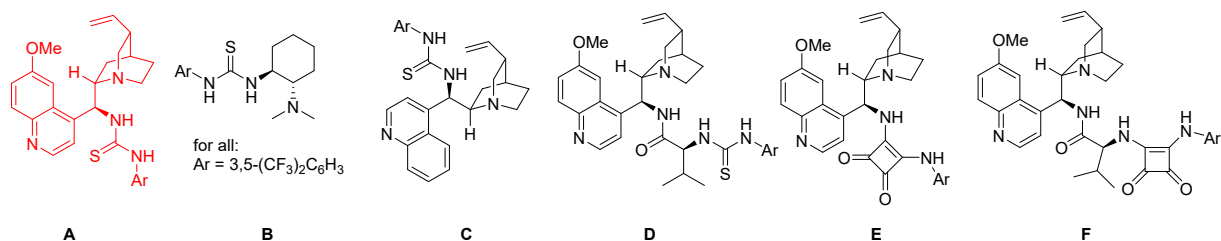

| entry | catalyst | solvent           | yield (%) <sup>b</sup> | ee (%) <sup>c</sup> |
|-------|----------|-------------------|------------------------|---------------------|
| 1     | A        | CHCl <sub>3</sub> | 98                     | 98                  |
| 2     | B        | CHCl <sub>3</sub> | 80                     | 92                  |
| 3     | C        | CHCl <sub>3</sub> | 75                     | -95                 |
| 4     | D        | CHCl <sub>3</sub> | 10                     | 87                  |
| 5     | E        | CHCl <sub>3</sub> | 96                     | 98                  |
| 6     | F        | CHCl <sub>3</sub> | 10                     | 73                  |

|                 |             |                                      |    |    |
|-----------------|-------------|--------------------------------------|----|----|
| 7               | A           | CH <sub>2</sub> Cl <sub>2</sub>      | 78 | 96 |
| 8               | A           | ClCH <sub>2</sub> CH <sub>2</sub> Cl | 88 | 96 |
| 9               | A           | toluene                              | 67 | 98 |
| 10              | A           | CH <sub>3</sub> OH                   | 33 | 97 |
| 11              | A (5 mol%)  | CHCl <sub>3</sub>                    | 50 | 97 |
| 12              | A (20 mol%) | CHCl <sub>3</sub>                    | 98 | 98 |
| 13 <sup>d</sup> | A           | CHCl <sub>3</sub>                    | 98 | 97 |
| 14 <sup>e</sup> | A           | CHCl <sub>3</sub>                    | 98 | 98 |

[a] Reaction conditions: **1a** (0.1 mmol), catalyst (10 mol%) in solvent (2.0 mL) at 30 °C for 4 h, unless otherwise specified. [b]: Isolated yields. [c]: The ee value was determined by HPLC analysis. [d]: 4.0 mL CHCl<sub>3</sub>. [e] 1.0 mL CHCl<sub>3</sub>, 12 h.

### III. General procedure for the asymmetric reaction.

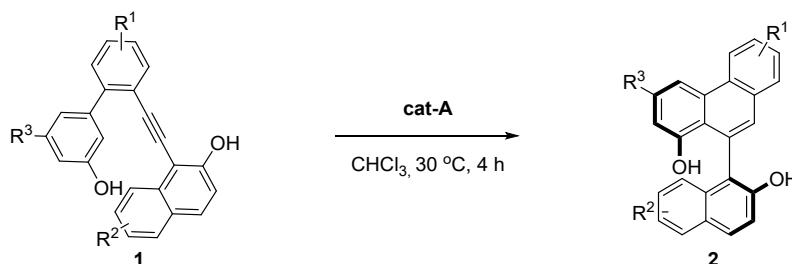

The substrate **1** (0.1 mmol), **cat-A** (10 mol%) were added to a 10 mL flame-dried schlenk tube with a magnetic stirring bar. Chloroform (2 mL) was injected into the tube. After stirring for specific time, The mixture was evaporated and purified by flash column chromatography (SiO<sub>2</sub>, DCM: Acetone = 20:1 or PE: Acetone = 2:1) to afford the product **2**. Racemic samples were prepared with NEt<sub>3</sub> as additive base.

#### IV. Racemization studies of **2n**

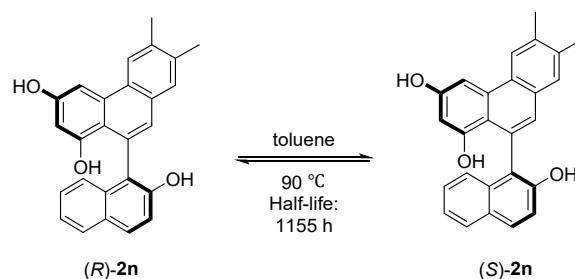

**Thermal Racemization of **2n**:** A solution of **2n** (5 mg, 98% ee) in toluene (15 mL) was heated at 90 °C. At intervals, small samples were taken and the solvent was removed by evaporation. The enantiomeric excess was determined by using HPLC (HPLC conditions: Chiralcel OD-H, Hexane/*i*-PrOH = 80:20, flow rate = 1.0 mL/min, wave length = 254 nm).

| Time (h) | (%t)   | $\ln((\%t-50)/(\%0-50))$ |
|----------|--------|--------------------------|
| 0        | 98.442 | -1.1E-16                 |
| 3        | 98.226 | -0.00447                 |
| 12       | 97.832 | -0.01267                 |
| 24       | 97.566 | -0.01825                 |
| 37       | 97.268 | -0.02453                 |

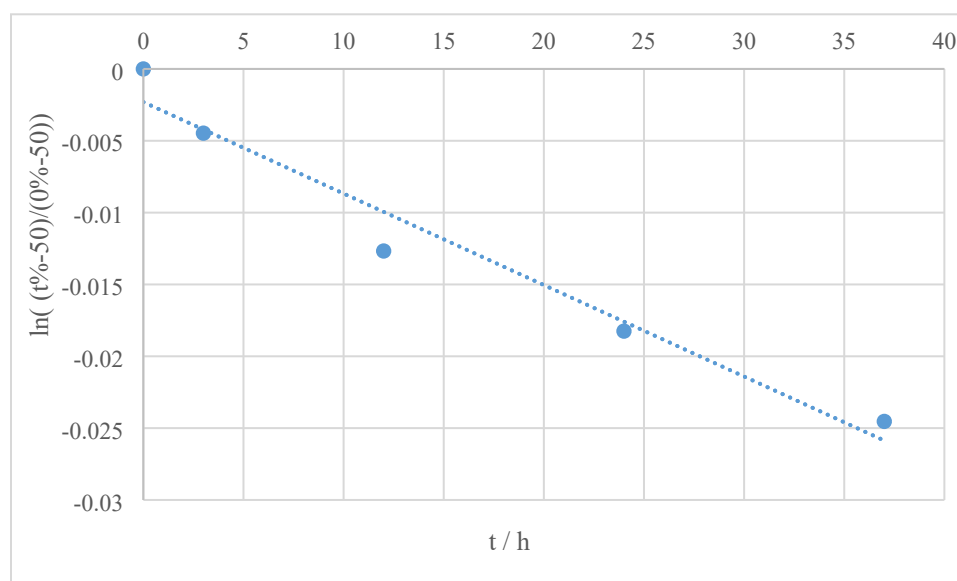

**Fig S1.** Kinetic line

## V. Application as selective fluorescence sensors toward heavy metal detectives.

**General fluorescence spectra measurements:** The stock solutions of **2p** were prepared by directly dissolving in CH<sub>3</sub>CN. For the spectroscopic determination, a variety of stock solutions of metal salts ( $1 \times 10^{-1}$  M) including Fe<sup>2+</sup>, Na<sup>+</sup>, Ce<sup>3+</sup>, Mg<sup>2+</sup>, Fe<sup>3+</sup>, Zn<sup>2+</sup>, In<sup>3+</sup>, Ca<sup>2+</sup>, Ni<sup>3+</sup>, Ir<sup>3+</sup>, K<sup>+</sup>, Ag<sup>+</sup>, Ba<sup>2+</sup>, Rb<sup>+</sup>, Ru<sup>3+</sup> were also dissolved in H<sub>2</sub>O and diluted to the desired concentrations. For titration of metallic ions, aliquots of 2  $\mu$ L aqueous metallic ion solutions were added to 200  $\mu$ L diluted **2p** solution. The measurements were performed after 1 min of response time. All experiments were carried out at 298 K. To make sure the reproducibility and stability of experimental data, all experiments were tested at least three times.

The fluorescence response behaviors of the prepared axial chiral biaryltriols **2p** on various main group and transition metal ions have been investigated. Ru<sup>3+</sup> ion exhibited the most pronounced fluorescence response of **2p**, beyond Ru<sup>3+</sup> ion (Fig. S2). The fluorescence intensities of **2p** are almost not significantly affected by the addition of other ions respectively. It is indicated that **2p** may be potentially applied as heavy metal detective reagent in pharmaceutical and environmental analysis.

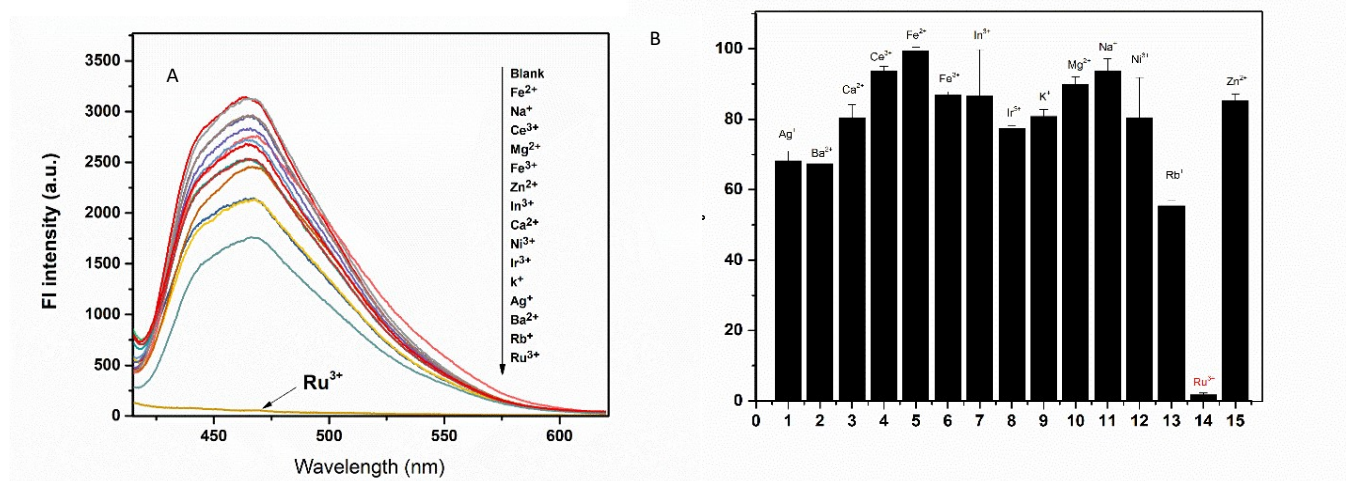

**Fig S2.** The influence of different main group and transition metal ions.

**Fig S2.** A: Emission spectra of **2p** ( $1.0 \times 10^{-3}$  M) in CH<sub>3</sub>CN solution in the absence and the presence of  $1.0 \times 10^{-3}$  M of different various main group and transition metal ions at 25 °C. excitation wavelength: 400 nm; excitation and emission slits (nm): 5.0 nm and 5.0 nm, respectively. Voltage: 800 V. B: Representative bar chart of **2p** ( $F/F_0$  %), where  $F_0$  and  $F$  were emission intensities of

sensor **2p** at 463 nm ( $\lambda_{\text{ex}} = 400$  nm) in the absence and the presence of different various main group and transition metal ions.

A

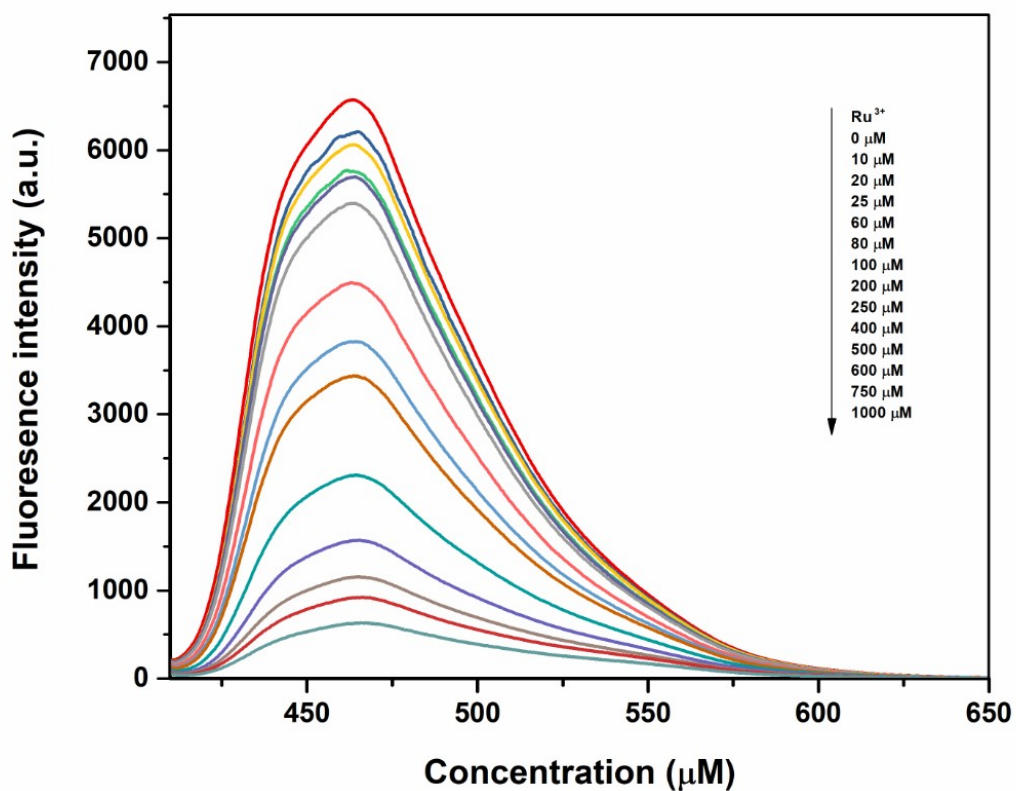

B

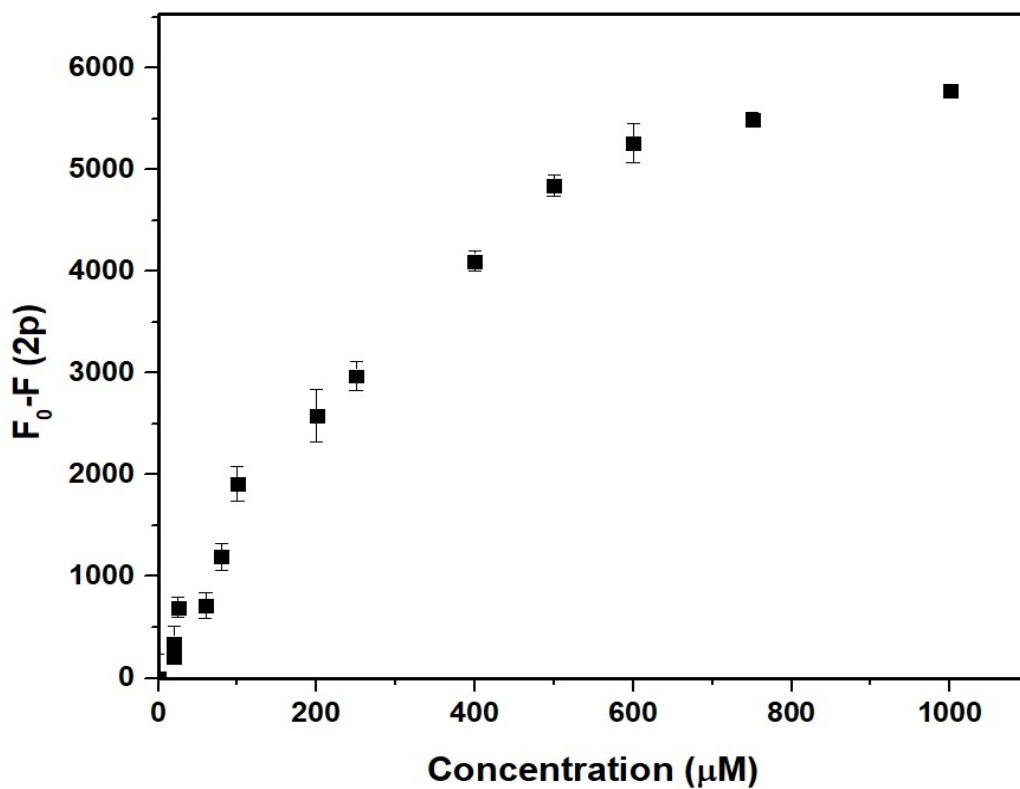

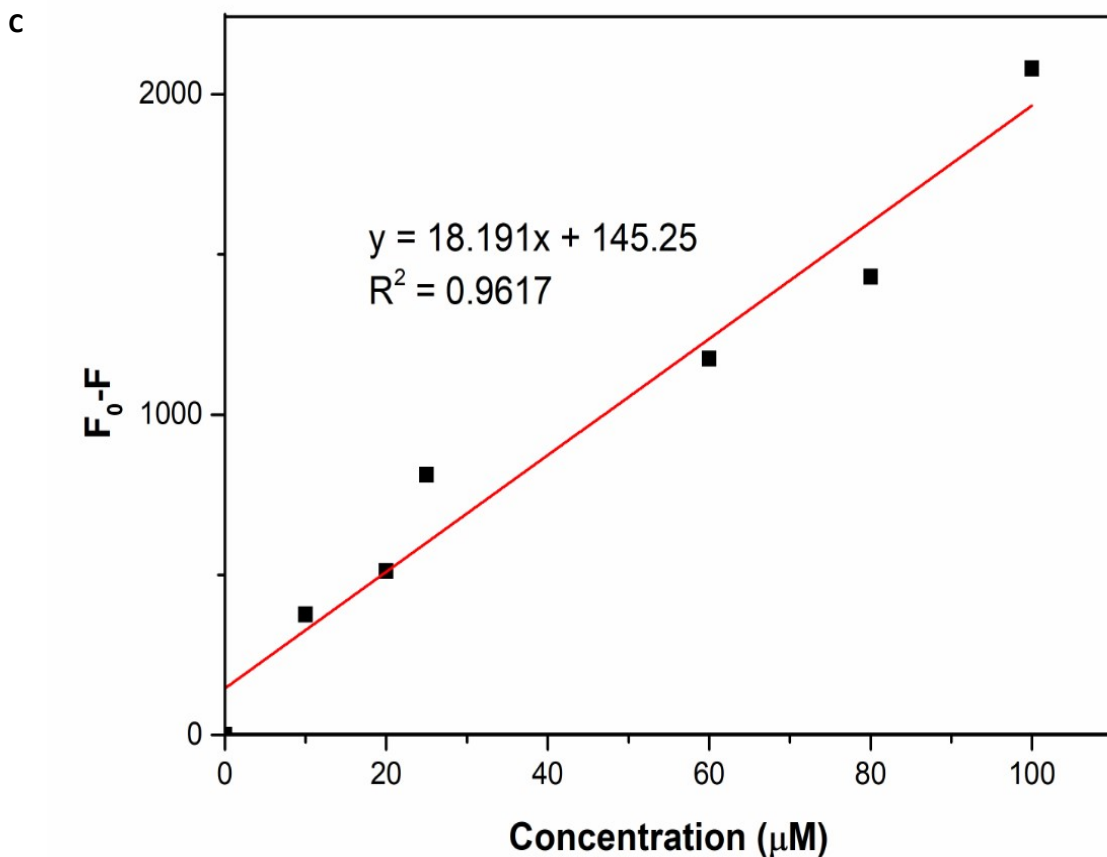

**Fig S3.** A: Fluorescence intensity response in the presence of  $1 \times 10^{-2}$  M. **2p** and with increasing concentration of  $\text{Ru}^{3+}$ : 0, 10, 20, 25, 60, 80, 100, 200, 250, 400, 500, 600, 750, 1000  $\mu\text{M}$ . (excitation wavelength: 400 nm; excitation 3 and emission slits (nm): 5.0 nm and 5.0 nm, respectively. Voltage: 700 V). **B:** Plot of  $F_0 - F$  where  $F_0$  and  $F$  were emission intensities of sensor **2p** at 463 nm ( $\lambda_{\text{ex}} = 400$  nm) in the absence and the presence of different concentration of  $\text{Ru}^{3+}$ . **C:** Linear relationship of  $F_0 - F$  versus the concentration of  $\text{Ru}^{3+}$  over the range of 0-100  $\mu\text{M}$ . the detective concentration limitation of **2p** toward  $\text{Ru}^{3+}$  was then calculated to be 25  $\mu\text{M}$  according to  $3\sigma$  method.<sup>4</sup>

$$\text{Limit of Detection} = \frac{3 \times \text{Standard deviation of the intercept}}{\text{Slope of the intercept}}$$



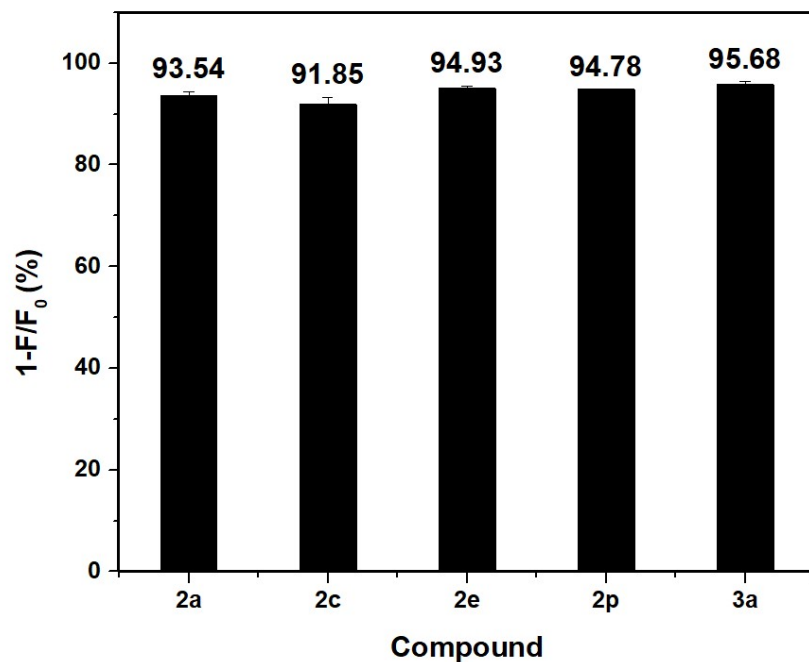

**Fig S4:** Bar chart of fluorescence intensity of **2a**, **2c**, **2e**, **2p**, **3a** ( $1.0 \times 10^{-2}$  M)

**Fig S4:** Fluorescence quenching degrees ( $1-F/F_0$ ) in the presence of  $\text{Ru}^{3+}$  ( $1.0 \times 10^{-3}$  M).  $F$  and  $F_0$  are taken as the fluorescence intensity in the absence and the presence of  $\text{Ru}^{3+}$  at 463 nm.

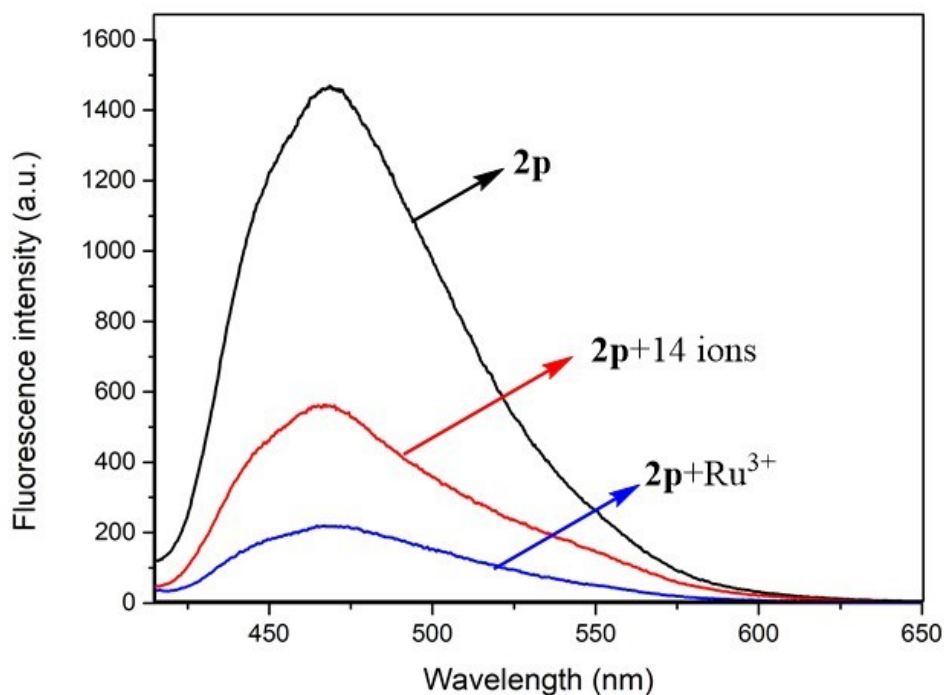

**Fig S5:** Metal ion specificity.

**Fig S5:** Emission spectra of a  $\text{CH}_3\text{CN}$  solution of **2p** ( $1.0 \times 10^{-2}$  M). the concentration of each metal

ion added is  $1.0 \times 10^{-3}$  M; emission spectra of **2p** with 14 interference ions (black); emission spectra of **2p** with only  $\text{Ru}^{3+}$  ion (red); emission spectra of **2p** with 14 interference ions and  $\text{Ru}^{3+}$  ion (blue).

## VI. $^1\text{H}$ , $^{13}\text{C}$ NMR and HRMS data of compounds (1a-1u)

### 2'-((2-hydroxynaphthalen-1-yl)ethynyl)-[1,1'-biphenyl]-3,5-diol (**1a**)

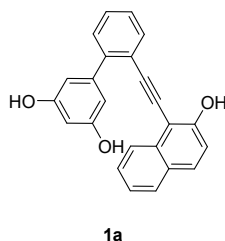

$^1\text{H}$  NMR (400 MHz,  $(\text{CD}_3)_2\text{CO}$ ):  $\delta$  8.44 (s, 3H), 7.87 (d,  $J = 8.3$  Hz, 1H), 7.83 (d,  $J = 7.2$  Hz, 1H), 7.78 (dd,  $J = 8.1, 4.2$  Hz, 2H), 7.49 – 7.38 (m, 4H), 7.32 (t,  $J = 7.4$  Hz, 1H), 7.19 (d,  $J = 8.9$  Hz, 1H), 6.71 (s, 2H), 6.55 (s, 1H).  $^{13}\text{C}$  NMR (100 MHz,  $(\text{CD}_3)_2\text{CO}$ ):  $\delta$  159.25, 157.60, 144.69, 143.87, 135.02, 133.35, 131.04, 129.89, 129.02, 128.90, 128.60, 128.08, 127.85, 125.85, 124.38, 122.71, 118.04, 108.60, 103.97, 102.60, 99.92, 86.96. **HRMS (ESI)**  $m/z$  Calcd for  $[\text{C}_{24}\text{H}_{16}\text{NaO}_3, \text{M}+\text{Na}]^+$ : 375.0992, Found: 375.0912.

### 3'-fluoro-2'-((2-hydroxynaphthalen-1-yl)ethynyl)-[1,1'-biphenyl]-3,5-diol (**1b**)

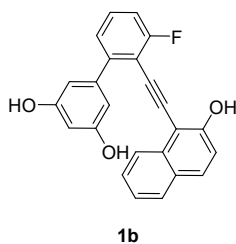

$^1\text{H}$  NMR (400 MHz,  $(\text{CD}_3)_2\text{CO}$ ):  $\delta$  8.41 (s, 3H), 7.98 (d,  $J = 8.4$  Hz, 1H), 7.81 (t,  $J = 8.1$  Hz, 2H), 7.54 – 7.44 (m, 2H), 7.35 (t,  $J = 7.3$  Hz, 1H), 7.27 (dd,  $J = 14.6, 8.2$  Hz, 2H), 7.22 (d,  $J = 8.9$  Hz, 1H), 6.74 (d,  $J = 2.1$  Hz, 2H), 6.53 (t,  $J = 2.0$  Hz, 1H).  $^{13}\text{C}$  NMR (100 MHz,  $(\text{CD}_3)_2\text{CO}$ ):  $\delta$  163.38 (d,  $J = 248.0$  Hz), 159.33, 157.91, 146.67, 142.45, 134.90, 131.50, 130.30 (d,  $J = 9.0$  Hz), 128.91, 128.77, 128.24, 125.75 (d,  $J = 3.0$  Hz), 125.62, 124.51, 117.91, 114.75, 114.54, 111.58 (d,  $J = 16.0$  Hz), 108.52, 103.71, 103.06, 92.65. **HRMS (ESI)**  $m/z$  Calcd for  $[\text{C}_{24}\text{H}_{15}\text{FNaO}_3, \text{M} + \text{Na}]^+$ : 393.0897, Found: 393.0845

### 2'-((2-hydroxynaphthalen-1-yl)ethynyl)-6'-methyl-[1,1'-biphenyl]-3,5-diol (**1c**)

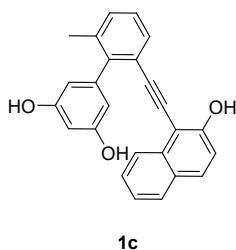

$^1\text{H}$  NMR (400 MHz,  $\text{DMSO}-d_6$ ):  $\delta$  10.17 (s, 1H), 9.34 (s, 2H), 7.77 – 7.70 (m, 2H), 7.51 (d,  $J = 6.2$  Hz, 1H), 7.30 (q,  $J = 7.4, 5.8$  Hz, 4H), 7.17 (t,  $J = 7.9$  Hz, 2H), 6.36 (s, 1H), 6.16 (s, 2H), 2.11 (s, 3H).  $^{13}\text{C}$  NMR (100 MHz,  $\text{DMSO}-d_6$ ):  $\delta$  158.79, 157.25, 143.90, 142.10, 135.87, 134.29, 130.13, 129.72, 129.32, 127.91, 127.45, 127.34, 127.26, 124.97, 123.43, 123.08, 117.88, 107.19, 102.82, 101.59, 98.14, 87.36, 20.28. **HRMS (ESI)**  $m/z$  Calcd for  $[\text{C}_{25}\text{H}_{18}\text{NaO}_3, \text{M} + \text{Na}]^+$ : 389.1148, Found: 389.1093.

### 2'-fluoro-6'-((2-hydroxynaphthalen-1-yl)ethynyl)-[1,1'-biphenyl]-3,5-diol (**1d**)

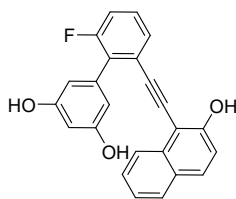

**1d**

$^1\text{H NMR}$  (400 MHz,  $\text{DMSO-}d_6$ ):  $\delta$  10.32 (s, 1H), 9.41 (s, 2H), 7.80 – 7.74 (m, 2H), 7.54 (d,  $J = 7.7$  Hz, 1H), 7.45 (q,  $J = 7.8$  Hz, 1H), 7.35 – 7.27 (m, 4H), 7.18 (d,  $J = 8.9$  Hz, 1H), 6.39 (s, 1H), 6.32 (s, 2H).  $^{13}\text{C NMR}$  (100 MHz,  $\text{DMSO-}d_6$ ):  $\delta$  159.21 (d,  $J = 242.0$  Hz), 158.69, 157.85, 135.67, 134.32, 131.26 (d,  $J = 18.0$  Hz), 130.73, 129.30 (d,  $J = 10.0$  Hz), 128.16 (d,  $J = 2.0$  Hz), 128.08, 127.51 (d,  $J = 4.0$  Hz), 125.23, 127.49, 124.74, 123.56, 117.94, 115.67 (d,  $J = 23.0$  Hz), 108.13, 102.39, 102.23, 96.50 (d,  $J = 4.0$  Hz), 88.75. **HRMS (ESI)**  $m/z$  Calcd for  $[\text{C}_{24}\text{H}_{15}\text{FNaO}_3, \text{M} + \text{Na}]^+$ : 393.0897, Found: 393.0852.

### 2'-chloro-6'-((2-hydroxynaphthalen-1-yl)ethynyl)-[1,1'-biphenyl]-3,5-diol (**1e**)

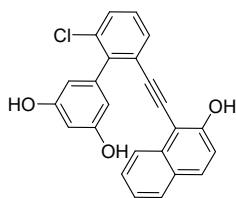

**1e**

$^1\text{H NMR}$  (400 MHz,  $\text{DMSO-}d_6$ ):  $\delta$  10.35 (s, 1H), 9.48 (s, 2H), 7.78 (dd,  $J = 8.3$ , 5.6 Hz, 2H), 7.73 (d,  $J = 7.7$  Hz, 1H), 7.56 (d,  $J = 8.0$  Hz, 1H), 7.47 – 7.38 (m, 2H), 7.33 (t,  $J = 7.4$  Hz, 1H), 7.28 – 7.20 (m, 2H), 6.49 (t,  $J = 2.0$  Hz, 1H), 6.31 (d,  $J = 2.1$  Hz, 2H).  $^{13}\text{C NMR}$  (100 MHz,  $\text{DMSO-}d_6$ ):  $\delta$  158.84, 157.82, 142.33, 140.03, 134.33, 132.85, 130.77, 130.68, 129.12, 129.03, 128.09, 127.57, 127.51, 125.48, 124.83, 123.61, 117.99, 107.56, 102.36, 102.29, 96.92, 88.99. **HRMS (ESI)**  $m/z$  Calcd for  $[\text{C}_{24}\text{H}_{15}\text{ClNaO}_3, \text{M} + \text{Na}]^+$ : 409.0602, Found: 409.0583.

### 2'-((2-hydroxynaphthalen-1-yl)ethynyl)-5'-methyl-[1,1'-biphenyl]-3,5-diol (**1f**)

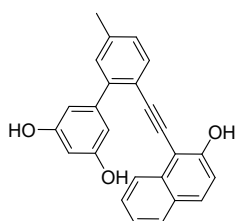

**1f**

$^1\text{H NMR}$  (400 MHz,  $(\text{CD}_3)_2\text{CO}$ ):  $\delta$  8.38 (s, 3H), 7.87 (d,  $J = 8.4$  Hz, 1H), 7.76 (d,  $J = 8.6$  Hz, 2H), 7.70 (d,  $J = 7.8$  Hz, 1H), 7.45 (t,  $J = 7.5$  Hz, 1H), 7.31 (t,  $J = 7.4$  Hz, 1H), 7.25 (s, 1H), 7.22 (d,  $J = 8.0$  Hz, 1H), 7.18 (d,  $J = 8.9$  Hz, 1H), 6.69 (d,  $J = 2.2$  Hz, 2H), 6.53 (t,  $J = 2.2$  Hz, 1H), 2.41 (s, 3H).  $^{13}\text{C NMR}$  (100 MHz,  $(\text{CD}_3)_2\text{CO}$ ):  $\delta$  159.25, 157.41, 144.67, 143.99, 139.15, 135.01, 133.31, 130.81, 130.60, 128.95, 128.62, 128.59, 128.03, 125.92, 124.35, 119.78, 118.01, 108.59, 104.22, 102.56, 100.21, 86.16, 21.28. **HRMS (ESI)**  $m/z$  Calcd for  $[\text{C}_{25}\text{H}_{18}\text{NaO}_3, \text{M} + \text{Na}]^+$ : 389.1148, Found: 389.1105.

### 5'-fluoro-2'-((2-hydroxynaphthalen-1-yl)ethynyl)-[1,1'-biphenyl]-3,5-diol (**1g**)

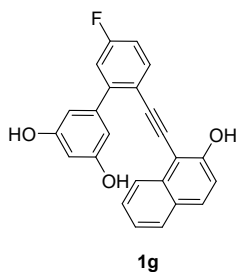

**<sup>1</sup>H NMR** (400 MHz, DMSO-*d*<sub>6</sub>): δ 10.28 (s, 1H), 9.48 (s, 2H), 7.80 (t, *J* = 9.3 Hz, 3H), 7.68 (d, *J* = 7.5 Hz, 1H), 7.40 (t, *J* = 7.2 Hz, 1H), 7.37 – 7.19 (m, 4H), 6.53 (s, 2H), 6.43 (s, 1H). **<sup>13</sup>C NMR** (100 MHz, DMSO-*d*<sub>6</sub>): δ 161.57 (d, *J* = 246.0 Hz), 158.63, 157.68, 146.18 (d, *J* = 8.0 Hz), 141.42, 134.85 (d, *J* = 8.0 Hz), 134.33, 130.35, 128.09, 127.56, 127.43, 124.87, 123.53, 118.58 (d, *J* = 3.0

Hz), 118.00, 116.18 (d, *J* = 22.0 Hz), 114.72 (d, *J* = 22.0 Hz), 107.43, 102.66, 102.29, 96.80, 87.44.

**HRMS (ESI)** *m/z* Calcd for [C<sub>24</sub>H<sub>15</sub>FNao<sub>3</sub>, M + Na]<sup>+</sup>: 393.0897, Found: 393.0847.

### 2'-((2-hydroxynaphthalen-1-yl)ethynyl)-4'-methyl-[1,1'-biphenyl]-3,5-diol (**1h**)

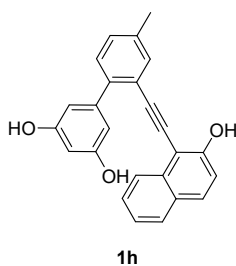

**<sup>1</sup>H NMR** (400 MHz, (CD<sub>3</sub>)<sub>2</sub>CO): δ 8.42 (s, 3H), 7.89 (d, *J* = 8.4 Hz, 1H), 7.77 (dd, *J* = 8.4, 2.9 Hz, 2H), 7.64 (s, 1H), 7.49 – 7.43 (m, 1H), 7.32 (dd, *J* = 7.3, 5.7 Hz, 2H), 7.27 – 7.22 (m, 1H), 7.19 (d, *J* = 8.9 Hz, 1H), 6.69 (d, *J* = 2.1 Hz, 2H), 6.53 (t, *J* = 2.1 Hz, 1H), 2.39 (s, 3H). **<sup>13</sup>C NMR** (100 MHz, (CD<sub>3</sub>)<sub>2</sub>CO): δ 159.24, 157.58, 143.83, 141.98, 137.49, 135.04, 133.71, 130.96, 129.88, 129.83,

128.93, 128.60, 128.07, 125.90, 124.37, 122.48, 118.03, 108.63, 104.07, 102.46, 100.20, 86.53, 20.73. **HRMS (ESI)** *m/z* Calcd for [C<sub>25</sub>H<sub>18</sub>NaO<sub>3</sub>, M + Na]<sup>+</sup>: 389.1148, Found: 389.1112.

### 4'-fluoro-2'-((2-hydroxynaphthalen-1-yl)ethynyl)-[1,1'-biphenyl]-3,5-diol (**1i**)

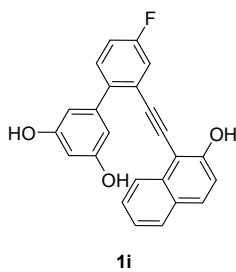

**<sup>1</sup>H NMR** (400 MHz, (CD<sub>3</sub>)<sub>2</sub>CO): δ 8.47 (s, 3H), 7.83 – 7.76 (m, 3H), 7.61 (dd, *J* = 9.7, 2.8 Hz, 1H), 7.47 – 7.42 (m, 2H), 7.33 (ddd, *J* = 8.1, 6.8, 1.2 Hz, 1H), 7.23 (td, *J* = 8.5, 2.8 Hz, 1H), 7.19 (d, *J* = 9.0 Hz, 1H), 6.65 (d, *J* = 2.2 Hz, 2H), 6.53 (t, *J* = 2.2 Hz, 1H). **<sup>13</sup>C NMR** (100 MHz, (CD<sub>3</sub>)<sub>2</sub>CO): δ 162.19 (d, *J* = 244.0 Hz), 159.34, 158.02, 142.88, 141.21, 135.06, 131.83 (d, *J* = 8.0 Hz),

131.53, 128.91, 128.65, 128.24, 125.81, 124.64 (d, *J* = 9.0 Hz), 124.47, 119.27 (d, *J* = 23.0 Hz), 118.14, 116.02, (d, *J* = 21.0 Hz), 108.73, 103.46, 102.74, 98.71, 88.06. **HRMS (ESI)** *m/z* Calcd for [C<sub>24</sub>H<sub>15</sub>FNao<sub>3</sub>, M + Na]<sup>+</sup>: 393.0897, Found: 393.0847.

### 4'-chloro-2'-((2-hydroxynaphthalen-1-yl)ethynyl)-[1,1'-biphenyl]-3,5-diol (1j)

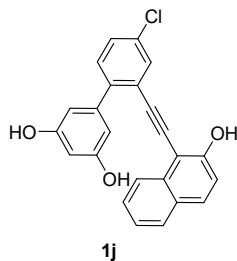

$^1\text{H NMR}$  (400 MHz,  $(\text{CD}_3)_2\text{CO}$ ):  $\delta$  8.59 (s, 3H), 7.91 (s, 1H), 7.84 (d,  $J = 8.3$  Hz, 1H), 7.81 – 7.74 (m, 2H), 7.45 (d,  $J = 12.8$  Hz, 3H), 7.32 (t,  $J = 7.4$  Hz, 1H), 7.20 (d,  $J = 8.9$  Hz, 1H), 6.74 (s, 2H), 6.62 (s, 1H).  $^{13}\text{C NMR}$  (100 MHz,  $(\text{CD}_3)_2\text{CO}$ ):  $\delta$  159.26, 157.95, 143.23, 142.57, 134.94, 133.03, 132.45, 131.51, 131.42, 128.83, 128.79, 128.60, 128.18, 125.69, 124.51, 124.41, 118.11, 108.55, 103.34, 102.87, 98.47, 88.32. **HRMS (ESI)**  $m/z$  Calcd for  $[\text{C}_{24}\text{H}_{15}\text{ClNaO}_3, \text{M} + \text{Na}]^+$ : 409.0602, Found: 409.0583.

### 2'-((2-hydroxynaphthalen-1-yl)ethynyl)-4'-nitro-[1,1'-biphenyl]-3,5-diol (1k)

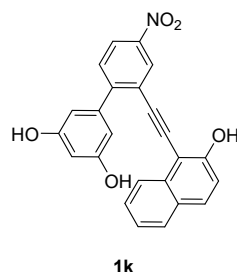

$^1\text{H NMR}$  (600 MHz,  $(\text{CD}_3)_2\text{CO}$ ):  $\delta$  8.85 (s, 1H), 8.68 (s, 1H), 8.54 (s, 2H), 8.27 (d,  $J = 8.3$  Hz, 1H), 7.84 (d,  $J = 8.8$  Hz, 1H), 7.80 (d,  $J = 7.9$  Hz, 1H), 7.74 (d,  $J = 8.2$  Hz, 1H), 7.70 (d,  $J = 8.4$  Hz, 1H), 7.44 (t,  $J = 7.5$  Hz, 1H), 7.34 (t,  $J = 7.4$  Hz, 1H), 7.21 (d,  $J = 8.8$  Hz, 1H), 6.73 (s, 2H), 6.61 (s, 1H).  $^{13}\text{C NMR}$  (150 MHz,  $(\text{CD}_3)_2\text{CO}$ ):  $\delta$  159.63, 158.52, 150.62, 147.81, 141.94, 135.15, 131.99, 131.34, 128.96, 128.74, 128.38, 127.88, 127.84, 125.72, 124.57, 124.49, 123.37, 123.34, 118.35, 108.45, 103.66, 103.11, 97.77, 89.52. **HRMS (ESI)**  $m/z$  Calcd for  $[\text{C}_{24}\text{H}_{15}\text{NNaO}_5, \text{M} + \text{Na}]^+$ : 420.0842, Found: 420.0782

### 2'-((2-hydroxynaphthalen-1-yl)ethynyl)-4'-(trifluoromethyl)-[1,1'-biphenyl]-3,5-diol (1l)

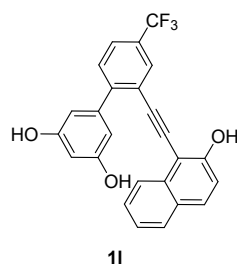

$^1\text{H NMR}$  (400 MHz,  $\text{DMSO}-d_6$ ):  $\delta$  10.34 (s, 1H), 9.53 (s, 2H), 8.11 (s, 1H), 7.81 (q,  $J = 8.1$  Hz, 3H), 7.63 (d,  $J = 8.0$  Hz, 2H), 7.38 (dt,  $J = 18.4, 6.7$  Hz, 2H), 7.23 (d,  $J = 8.9$  Hz, 1H), 6.60 – 6.51 (m, 2H), 6.45 (s, 1H).  $^{13}\text{C NMR}$  (100 MHz,  $\text{DMSO}-d_6$ ):  $\delta$  158.76, 158.15, 147.44, 141.21, 134.29, 131.03, 130.37, 129.02, 129.01, 128.26 (q,  $J = 31.0$  Hz), 128.15, 127.61, 127.56, 124.77, 124.10 (q,  $J =$

271.0 Hz), 123.66, 123.09, 120.56, 118.12, 107.33, 102.46, 102.01, 96.51, 89.28. **HRMS (ESI)**  $m/z$  Calcd for  $[\text{C}_{25}\text{H}_{15}\text{F}_3\text{NaO}_3, \text{M} + \text{Na}]^+$ : 443.0866, Found: 443.0811.

### 2'-((2-hydroxynaphthalen-1-yl)ethynyl)-4'-(trifluoromethoxy)-[1,1'-biphenyl]-3,5-diol (1m)

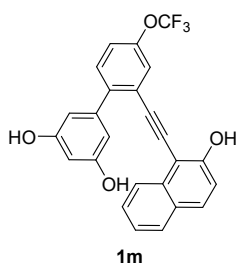

**<sup>1</sup>H NMR** (400 MHz, DMSO-*d*<sub>6</sub>): δ 10.33 (s, 1H), 9.47 (s, 2H), 7.81 (t, *J* = 7.8 Hz, 2H), 7.74 (d, *J* = 7.1 Hz, 1H), 7.61 (t, *J* = 9.4 Hz, 1H), 7.52 (dd, *J* = 8.2, 5.8 Hz, 1H), 7.45 (d, *J* = 8.4 Hz, 1H), 7.37 (dq, *J* = 14.6, 7.1 Hz, 2H), 7.22 (dd, *J* = 8.8, 5.7 Hz, 1H), 6.54 – 6.46 (m, 2H), 6.45 – 6.38 (m, 1H). **<sup>13</sup>C NMR** (100 MHz, DMSO-*d*<sub>6</sub>): δ 158.63, 158.62, 158.07, 147.29, 143.02, 141.18, 134.26, 131.21, 130.96, 128.10, 127.55, 127.51, 124.74, 124.33, 123.86, 123.84, 123.61, 120.99, 120.26, 118.04 (q, *J* = 255.0 Hz), 107.43, 102.14, 102.00, 96.44, 89.13. **HRMS (ESI)** *m/z* Calcd for [C<sub>25</sub>H<sub>15</sub>F<sub>3</sub>NaO<sub>4</sub>, M + Na]<sup>+</sup>: 459.0815, Found: 459.0769.

### 2'-((2-hydroxynaphthalen-1-yl)ethynyl)-4',5'-dimethyl-[1,1'-biphenyl]-3,5-diol (1n)

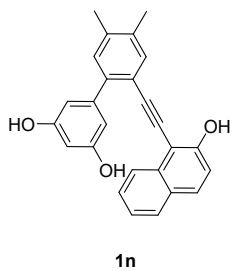

**<sup>1</sup>H NMR** (600 MHz, (CD<sub>3</sub>)<sub>2</sub>CO): δ 8.30 (s, 3H), 7.89 (d, *J* = 8.2 Hz, 1H), 7.76 (d, *J* = 8.4 Hz, 2H), 7.58 (s, 1H), 7.44 (t, *J* = 7.4 Hz, 1H), 7.31 (t, *J* = 7.3 Hz, 1H), 7.23 – 7.15 (m, 2H), 6.67 (s, 2H), 6.50 (s, 1H), 2.32 (d, *J* = 9.6 Hz, 6H). **<sup>13</sup>C NMR** (150 MHz, (CD<sub>3</sub>)<sub>2</sub>CO): δ 159.24, 157.39, 143.95, 142.43, 137.97, 136.27, 135.04, 134.23, 131.15, 130.75, 129.01, 128.60, 128.03, 125.99, 124.37, 119.92, 118.02, 108.65, 104.33, 102.43, 100.49, 85.79, 19.61, 19.10. **HRMS (ESI)** *m/z* Calcd for [C<sub>26</sub>H<sub>20</sub>NaO<sub>3</sub>, M + Na]<sup>+</sup>: 403.1305, Found: 403.1258.

### 4',5'-difluoro-2'-((2-hydroxynaphthalen-1-yl)ethynyl)-[1,1'-biphenyl]-3,5-diol (1o)

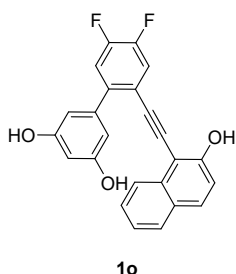

**<sup>1</sup>H NMR** (400 MHz, DMSO-*d*<sub>6</sub>): δ 10.29 (s, 1H), 9.47 (s, 2H), 7.89 – 7.72 (m, 3H), 7.60 (s, 1H), 7.53 – 7.46 (m, 1H), 7.35 (dt, *J* = 14.4, 7.5 Hz, 2H), 7.21 (d, *J* = 8.8 Hz, 1H), 6.48 (s, 2H), 6.41 (s, 1H). **<sup>13</sup>C NMR** (100 MHz, DMSO-*d*<sub>6</sub>): δ 158.61, 157.95, 149.00 (dd, *J* = 254.5, 13.0 Hz), 148.42 (dd, *J* = 245.5, 13.0 Hz), 141.55 (dd, *J* = 5.0, 3.0 Hz), 140.57, 134.25, 130.78, 128.11, 127.51, 124.74, 123.59, 121.40 (dd, *J* = 18.0, 3.0 Hz), 119.08, (dd, *J* = 9.0, 4.0 Hz), 118.39 (dd, *J* = 19.0, 3.0 Hz), 118.01, 107.50 (d, *J* = 5.0 Hz), 102.28 (d, *J* = 5.0 Hz), 102.07, 95.87, 88.22. **HRMS (ESI)** *m/z* Calcd for [C<sub>24</sub>H<sub>14</sub>F<sub>2</sub>NaO<sub>3</sub>, M+Na]<sup>+</sup>: 411.0803, Found: 411.0795.

**4'-chloro-2'-fluoro-6'-((2-hydroxynaphthalen-1-yl)ethynyl)-[1,1'-biphenyl]-3,5-diol (1p)**

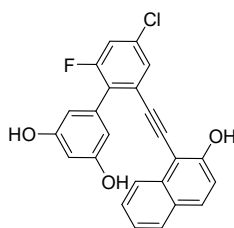

**1p**

**<sup>1</sup>H NMR** (400 MHz, DMSO-*d*<sub>6</sub>): δ 10.35 (s, 1H), 9.48 (s, 2H), 7.87 – 7.74 (m, 2H), 7.66 (s, 1H), 7.56 (d, *J* = 8.4 Hz, 1H), 7.33 (s, 3H), 7.18 (d, *J* = 8.4 Hz, 1H), 6.41 (s, 1H), 6.33 (s, 2H). **<sup>13</sup>C NMR** (100 MHz, (CD<sub>3</sub>)<sub>2</sub>CO): δ 160.25 (d, *J* = 246.0 Hz), 159.47, 158.23, 135.90, 134.99, 133.77 (d, *J* = 12.0 Hz), 131.92, 131.02 (d, *J* = 18.0 Hz), 128.81, 128.64, 128.33, 127.28 (d, *J* = 2.0 Hz), 125.62,

124.50, 118.17, 116.79, 116.51, 109.29, 103.50, 102.93, 97.30 (d, *J* = 3.0 Hz), 89.53. **HRMS (ESI)** *m/z* Calcd for [C<sub>24</sub>H<sub>14</sub>ClFNaO<sub>3</sub>, M+Na]<sup>+</sup>: 427.0508, Found: 427.0486.

**2'-((2-hydroxy-3-methoxynaphthalen-1-yl)ethynyl)-[1,1'-biphenyl]-3,5-diol (1q)**

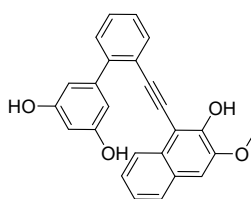

**1q**

**<sup>1</sup>H NMR** (400 MHz, DMSO-*d*<sub>6</sub>): δ 9.72 (s, 1H), 9.37 (s, 2H), 7.70 (d, *J* = 7.3 Hz, 2H), 7.56 (d, *J* = 8.1 Hz, 1H), 7.47 – 7.40 (m, 2H), 7.40 – 7.36 (m, 1H), 7.34 (s, 1H), 7.30 (t, *J* = 7.3 Hz, 1H), 7.25 (d, *J* = 7.8 Hz, 1H), 6.50 – 6.42 (m, 2H), 6.36 (s, 1H), 3.94 (s, 3H). **<sup>13</sup>C NMR** (100 MHz, DMSO-*d*<sub>6</sub>): δ 158.46, 149.46, 148.09, 143.90, 142.52, 132.61, 129.22, 129.10, 128.44, 127.92,

127.41, 126.66, 124.92, 124.67, 123.99, 121.79, 107.61, 107.59, 107.46, 107.39, 103.57, 101.82, 97.64, 87.38, 55.96. **HRMS (ESI)** *m/z* Calcd for [C<sub>25</sub>H<sub>18</sub>NaO<sub>4</sub>, M + Na]<sup>+</sup>: 405.1097, Found: 405.1023.

**2'-((2-hydroxy-6-phenylnaphthalen-1-yl)ethynyl)-[1,1'-biphenyl]-3,5-diol (1r)**

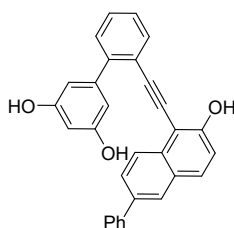

**1r**

**<sup>1</sup>H NMR** (400 MHz, (CD<sub>3</sub>)<sub>2</sub>CO): δ 8.51 (d, *J* = 26.8 Hz, 3H), 8.06 (s, 1H), 7.93 (d, *J* = 8.6 Hz, 1H), 7.86 (dd, *J* = 15.0, 8.0 Hz, 2H), 7.80 – 7.71 (m, 3H), 7.43 (ddt, *J* = 24.9, 14.7, 7.3 Hz, 6H), 7.23 (d, *J* = 8.9 Hz, 1H), 6.72 (s, 2H), 6.58 (s, 1H). **<sup>13</sup>C NMR** (100 MHz, (CD<sub>3</sub>)<sub>2</sub>CO): δ 159.32, 157.77, 144.84, 143.96, 141.45, 136.91, 134.37, 133.36, 131.42, 129.90, 129.61, 129.26, 129.05, 127.88,

127.62, 127.32, 126.66, 126.34, 122.79, 118.60, 108.69, 104.00, 102.63, 99.91, 87.02. **HRMS (ESI)** *m/z* Calcd for [C<sub>30</sub>H<sub>20</sub>NaO<sub>3</sub>, M + Na]<sup>+</sup>: 451.1305, Found: 451.1289.

### 5-((3',5'-dihydroxy-[1,1'-biphenyl]-2-yl)ethynyl)-6-hydroxy-2-naphthonitrile (**1s**)

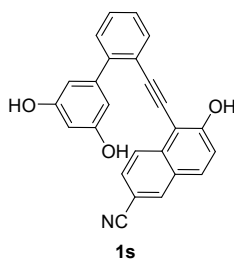

$^1\text{H NMR}$  (600 MHz,  $(\text{CD}_3)_2\text{CO}$ ):  $\delta$  9.18 (s, 1H), 8.41 (s, 2H), 8.32 (s, 1H), 7.95 (d,  $J = 8.9$  Hz, 1H), 7.86 (d,  $J = 8.6$  Hz, 1H), 7.81 (d,  $J = 7.4$  Hz, 1H), 7.57 (d,  $J = 8.6$  Hz, 1H), 7.49 – 7.46 (m, 1H), 7.44 (d,  $J = 7.6$  Hz, 2H), 7.36 (d,  $J = 8.9$  Hz, 1H), 6.64 (d,  $J = 1.9$  Hz, 2H), 6.57 (s, 1H).  $^{13}\text{C NMR}$  (100 MHz,  $(\text{CD}_3)_2\text{CO}$ ):  $\delta$  159.99, 159.33, 145.11, 143.99, 137.00, 134.65, 133.33, 131.57, 129.91, 129.33,

128.46, 127.98, 127.96, 127.29, 122.51, 120.19, 119.76, 108.71, 107.53, 104.75, 102.67, 100.50, 85.98. **HRMS (ESI)**  $m/z$  Calcd for  $[\text{C}_{25}\text{H}_{15}\text{NaO}_3, \text{M} + \text{Na}]^+$ : 400.0944, Found: 400.0876.

### 2'-((6-hydroxyquinolin-5-yl)ethynyl)-[1,1'-biphenyl]-3,5-diol (**1t**)

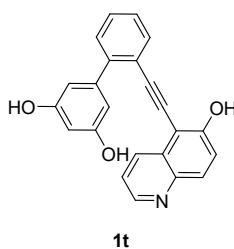

$^1\text{H NMR}$  (400 MHz,  $\text{DMSO}-d_6$ ):  $\delta$  10.70 (s, 1H), 9.49 (s, 2H), 8.75 (s, 1H), 7.94 (t,  $J = 8.6$  Hz, 2H), 7.76 (d,  $J = 6.5$  Hz, 1H), 7.47 (dd,  $J = 17.6, 9.5$  Hz, 4H), 7.37 (dd,  $J = 8.0, 3.6$  Hz, 1H), 6.51 (s, 2H), 6.43 (s, 1H).  $^{13}\text{C NMR}$  (100 MHz,  $\text{DMSO}-d_6$ ):  $\delta$  158.57, 157.65, 147.75, 143.99, 142.82, 142.59, 132.94, 132.59, 131.36, 129.61, 129.24, 128.68, 127.51, 122.29, 121.62, 121.52, 107.58,

107.51, 102.68, 101.86, 101.85, 97.99, 86.72. **HRMS (ESI)**  $m/z$  Calcd for  $[\text{C}_{23}\text{H}_{15}\text{NNaO}_3, \text{M} + \text{Na}]^+$ : 376.0944, Found: 376.0895.

### 1-((3',5'-dimethoxy-[1,1'-biphenyl]-2-yl)ethynyl)naphthalen-2-ol (**1u**)

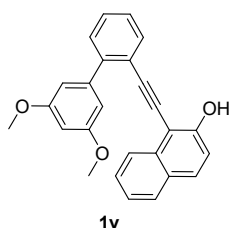

$^1\text{H NMR}$  (600 MHz,  $\text{CDCl}_3$ ):  $\delta$  7.97 (d,  $J = 8.3$  Hz, 1H), 7.73 (d,  $J = 7.1$  Hz, 1H), 7.69 (d,  $J = 8.1$  Hz, 1H), 7.65 (d,  $J = 8.9$  Hz, 1H), 7.46 (t,  $J = 7.5$  Hz, 1H), 7.38 (dq,  $J = 21.1, 7.0$  Hz, 3H), 7.31 (t,  $J = 7.4$  Hz, 1H), 7.11 (d,  $J = 8.9$  Hz, 1H), 6.77 (d,  $J = 1.8$  Hz, 2H), 6.58 (s, 1H), 5.89 (s, 1H), 3.77 (s, 6H).  $^{13}\text{C NMR}$  (150 MHz,  $\text{CDCl}_3$ ):  $\delta$  160.83, 156.20, 143.55, 142.98, 133.37, 132.27, 130.55, 129.32,

128.55, 128.28, 128.11, 127.42, 127.21, 124.79, 123.93, 121.42, 116.41, 107.06, 102.81, 100.93, 100.04, 85.20, 55.35. **HRMS (ESI)**  $m/z$  Calcd for  $[\text{C}_{26}\text{H}_{20}\text{NaO}_3, \text{M} + \text{Na}]^+$ : 403.1305, Found: 403.1285.



## VII. $^1\text{H}$ , $^{13}\text{C}$ NMR, HRMS data and HPLC traces of compounds (2a-2u)

### 10-(2-hydroxynaphthalen-1-yl)phenanthrene-1,3-diol (2a)

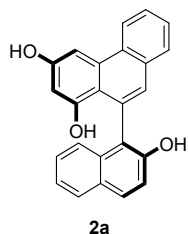

$^1\text{H}$  NMR (400 MHz,  $\text{CDCl}_3$ ):  $\delta$  8.35 (d,  $J = 6.0$  Hz, 1H), 7.80 (d,  $J = 8.6$  Hz, 1H), 7.72 (d,  $J = 7.4$  Hz, 1H), 7.66 – 7.58 (m, 1H), 7.55 (s, 1H), 7.46 (s, 2H), 7.30 (s, 1H), 7.18 (dd,  $J = 22.9, 9.7$  Hz, 4H), 6.31 (s, 1H), 6.03 (s, 1H), 5.83 (s, 1H), 5.58 (s, 1H).

$^{13}\text{C}$  NMR (100 MHz,  $\text{CDCl}_3$ ):  $\delta$  155.38, 151.27, 134.52, 133.33, 131.52, 131.37,

129.93, 128.87, 128.79, 128.39, 128.16, 127.59, 127.40, 127.28, 125.53, 124.60, 124.28, 123.39, 118.60, 117.58, 114.66, 103.39, 100.78. **HRMS (ESI)**  $m/z$  Calcd for  $[\text{C}_{24}\text{H}_{16}\text{NaO}_3, \text{M} + \text{Na}]^+$ :

375.0992, Found: 375.0949. **HPLC analysis:** Chiralcel OD-H (Hexane/*i*-PrOH) = 80:20, flow rate = 1.0 mL/min, wave length = 254 nm,  $t_R = 5.997$  min (major),  $t_R = 8.107$  min (minor). **Optical**

**Rotation:**  $[\alpha]_D^{20} = -54.5$  ( $c = 1.0$ ,  $(\text{CH}_3)_2\text{CO}$ ); **Physical properties:** white solid; **Yield:** 98%, 35 mg.

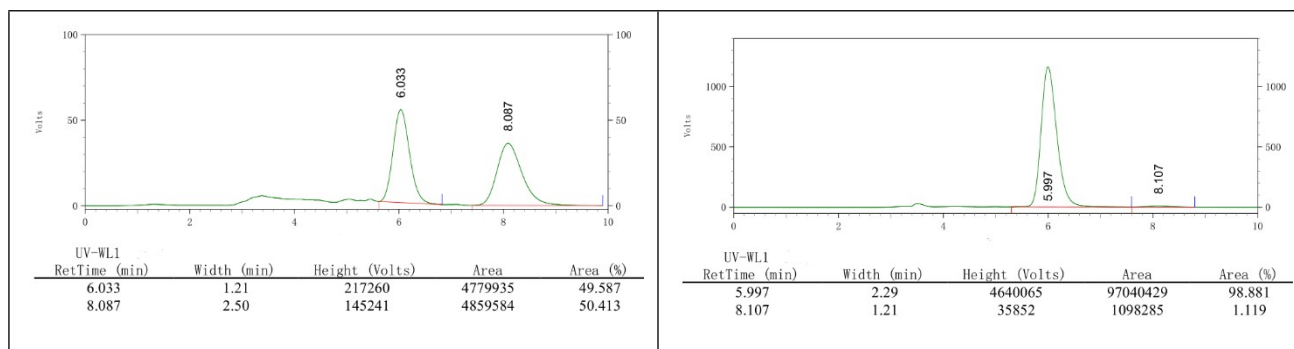

### 8-fluoro-10-(2-hydroxynaphthalen-1-yl)phenanthrene-1,3-diol (2b)

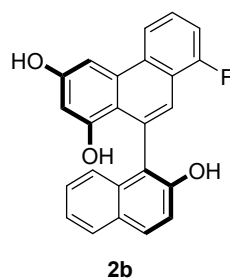

$^1\text{H}$  NMR (400 MHz,  $\text{DMSO}-d_6$ ):  $\delta$  9.80 (s, 1H), 9.32 (s, 1H), 9.14 (s, 1H), 8.44 (d,  $J = 8.5$  Hz, 1H), 7.77 (dd,  $J = 16.3, 8.1$  Hz, 2H), 7.66 (d,  $J = 1.7$  Hz, 1H), 7.61 (q,  $J = 8.0$  Hz, 1H), 7.44 – 7.38 (m, 1H), 7.29 (s, 1H), 7.25 (d,  $J = 8.8$  Hz, 1H), 7.18 (dt,  $J = 14.3, 6.3$  Hz, 2H), 7.09 (d,  $J = 7.9$  Hz, 1H), 6.44 (d,  $J = 2.2$  Hz, 1H).

$^{13}\text{C}$  NMR (100 MHz,  $\text{DMSO}-d_6$ ):  $\delta$  158.43 (d,  $J = 215.0$  Hz), 157.30,

157.05, 150.96, 134.46, 133.37, 133.35, 132.93, 130.97 (d,  $J = 5.0$  Hz), 127.60 (d,  $J = 5.0$  Hz), 127.28, 126.04 (d,  $J = 9.0$  Hz), 125.57, 125.20, 124.70, 121.99, 121.25 (d,  $J = 15.0$  Hz), 119.50 (d,  $J = 1.0$  Hz), 118.30, 116.27 (d,  $J = 6.0$  Hz), 116.19, 111.13 (d,  $J = 20.0$  Hz), 102.79, 98.81. **HRMS**

**(ESI)**  $m/z$  Calcd for  $[\text{C}_{24}\text{H}_{15}\text{FNaO}_3, \text{M} + \text{Na}]^+$ : 393.0897, Found: 393.0812. **HPLC analysis:** Chiralcel OD-H (Hexane/*i*-PrOH) = 80:20, flow rate = 1.0 mL/min, wave length = 254 nm,  $t_R =$

8.448 min (major),  $t_R = 13.071$  min (minor). **Optical Rotation:**  $[\alpha]_D^{20} = -36.5$  ( $c = 1.0$ ,  $(\text{CH}_3)_2\text{CO}$ );

**Physical properties:** white solid; **Yield:** 97%, 36 mg.

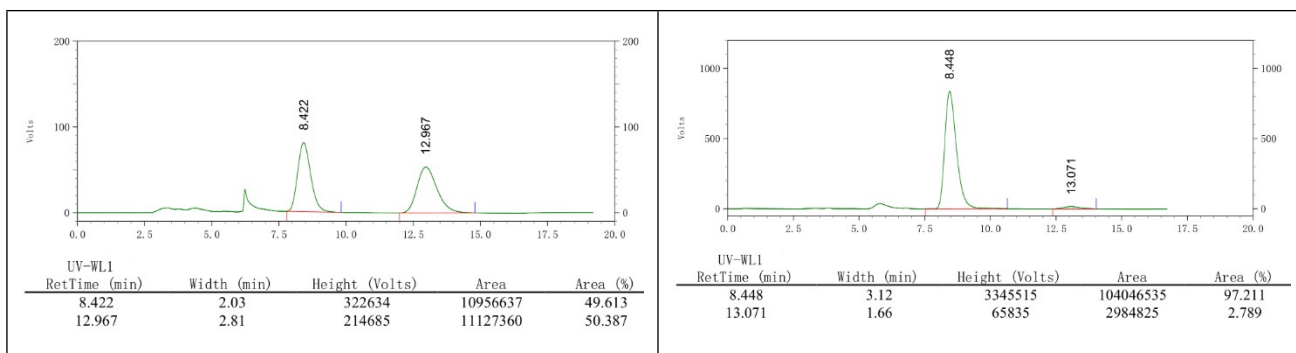

### 10-(2-hydroxynaphthalen-1-yl)-5-methylphenanthrene-1,3-diol (**2c**)

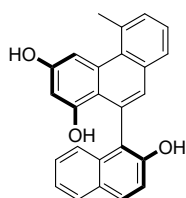

**2c**

**$^1\text{H}$  NMR** (400 MHz,  $\text{CDCl}_3$ ):  $\delta$  7.77 (dt,  $J = 17.6, 8.3$  Hz, 3H), 7.49 (s, 1H), 7.37 (s, 2H), 7.31 – 7.12 (m, 5H), 6.33 (s, 1H), 5.85 (s, 3H), 2.93 (s, 3H).  **$^{13}\text{C}$  NMR** (100 MHz,  $\text{CDCl}_3$ ):  $\delta$  154.92, 154.11, 151.23, 135.72, 135.58, 133.30, 133.15, 131.99, 131.28, 130.38, 129.90, 128.88, 128.16, 127.56, 127.07, 126.70, 124.98, 124.60, 124.25, 118.64, 117.59, 115.50, 106.55, 102.73, 27.18. **HRMS (ESI)**  $m/z$  Calcd for  $[\text{C}_{25}\text{H}_{18}\text{NaO}_3, \text{M} + \text{Na}]^+$ : 389.1148, Found: 389.1112. **HPLC analysis:** Chiralcel OJ-H (Hexane/*i*-PrOH) = 80:20, flow rate = 1.0 mL/min, wave length = 254 nm,  $t_R = 19.203$  min (minor),  $t_R =$

24.521 min (major). **Optical Rotation:**  $[\alpha]_D^{20} = -14.6$  ( $c = 1.0$ ,  $(\text{CH}_3)_2\text{CO}$ ); **Physical properties:** white solid; **Yield:** 98%, 35.8 mg.

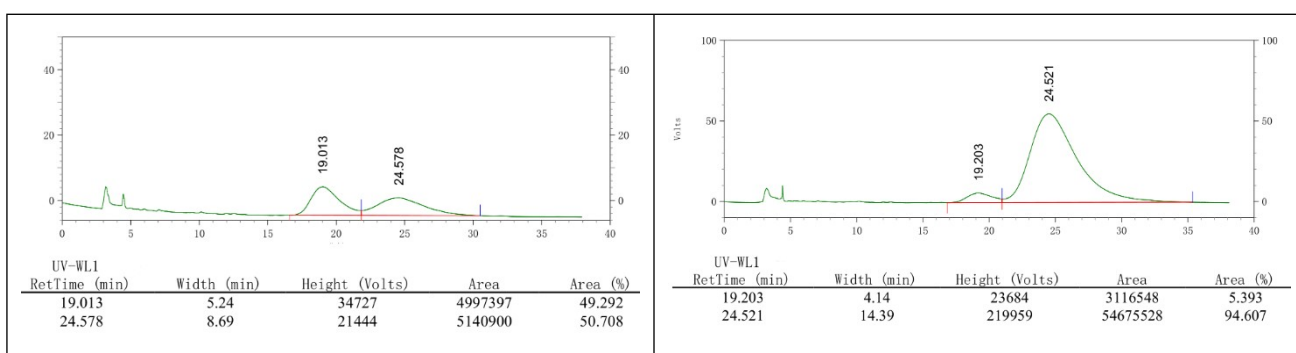

### 5-fluoro-10-(2-hydroxynaphthalen-1-yl)phenanthrene-1,3-diol (2d)

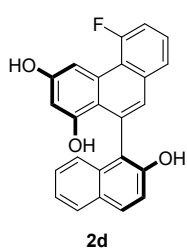

**<sup>1</sup>H NMR** (400 MHz, (CD<sub>3</sub>)<sub>2</sub>CO): δ 8.73 (s, 1H), 8.32 (dd, *J* = 11.7, 2.2 Hz, 1H), 7.96 (s, 1H), 7.91 (dd, *J* = 8.7, 6.1 Hz, 1H), 7.82 (dd, *J* = 8.2, 6.2 Hz, 2H), 7.78 – 7.73 (m, 2H), 7.42 (td, *J* = 8.6, 2.4 Hz, 1H), 7.36 (s, 1H), 7.28 (d, *J* = 8.9 Hz, 1H), 7.24 (dt, *J* = 8.0, 4.1 Hz, 1H), 7.19 (d, *J* = 3.4 Hz, 2H), 6.59 (d, *J* = 2.2 Hz, 1H). **<sup>13</sup>C**

**NMR** (100 MHz, (CD<sub>3</sub>)<sub>2</sub>CO): δ 161.94 (d, *J* = 251.0 Hz), 157.81, 156.93, 152.02,

136.06 (d, *J* = 4.0 Hz), 135.22, 132.87 (d, *J* = 5.0 Hz), 131.97, 129.26, 129.12, 128.40, 127.85 (d, *J* = 11.0 Hz), 127.67, 126.66, 125.50, 125.20, 123.93, 123.30, 119.49 (d, *J* = 8.0 Hz), 118.96, 117.10, 113.52 (d, *J* = 26.0 Hz), 105.06 (d, *J* = 27.0 Hz), 103.48. **HRMS (ESI)** *m/z* Calcd for [C<sub>24</sub>H<sub>15</sub>FNao<sub>3</sub>, M + Na]<sup>+</sup>: 393.0897, Found: 393.0814. **HPLC analysis:** Chiralcel OD-H (Hexane/*i*-PrOH) = 80:20, flow rate = 1.0 mL/min, wave length = 254 nm, *t<sub>R</sub>* = 9.399 min (major), *t<sub>R</sub>* = 11.418 min (minor).

**Optical Rotation:** [α]<sub>D</sub><sup>20</sup> = -51.3 (*c* = 1.0, (CH<sub>3</sub>)<sub>2</sub>CO); **Physical properties:** white solid; **Yield:** 94%, 34.7 mg.

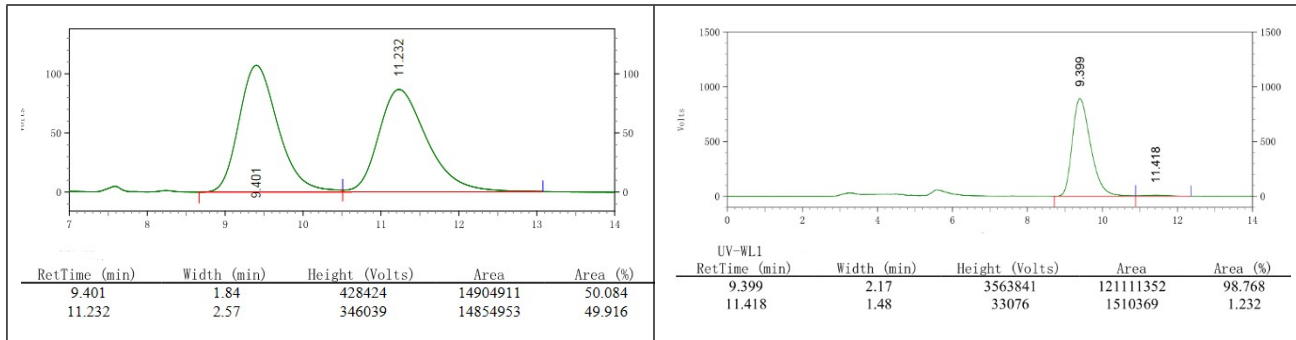

### 5-chloro-10-(2-hydroxynaphthalen-1-yl)phenanthrene-1,3-diol (2e)

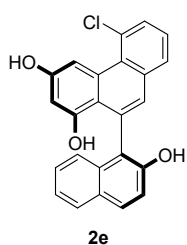

**<sup>1</sup>H NMR** (400 MHz, (CD<sub>3</sub>)<sub>2</sub>CO): δ 8.99 (d, *J* = 2.3 Hz, 1H), 8.81 (s, 1H), 7.98 (s, 1H), 7.89 (s, 1H), 7.86 – 7.79 (m, 3H), 7.73 (dd, *J* = 7.6, 1.4 Hz, 1H), 7.52 (t, *J* = 7.7 Hz, 1H), 7.33 (s, 1H), 7.27 (d, *J* = 8.8 Hz, 1H), 7.26 – 7.22 (m, 1H), 7.21 – 7.17 (m, 2H), 6.62 (d, *J* = 2.4 Hz, 1H). **<sup>13</sup>C NMR** (100 MHz, (CD<sub>3</sub>)<sub>2</sub>CO): δ 156.85,

156.64, 151.99, 136.39, 135.23, 134.07, 131.87, 131.66, 130.97, 129.14, 128.86,

128.39, 128.17, 127.48, 127.39, 126.62, 125.53, 124.06, 123.26, 118.99, 117.83, 105.34, 103.56.

**HRMS (ESI)** *m/z* Calcd for [C<sub>24</sub>H<sub>15</sub>ClNaO<sub>3</sub>, M + Na]<sup>+</sup>: 409.0602, Found: 409.0582. **HPLC**

**analysis:** Chiralcel OJ-H (Hexane/*i*-PrOH) = 80:20, flow rate = 1.0 mL/min, wave length = 254 nm,  $t_R = 25.090$  min (minor),  $t_R = 34.888$  min (major). **Optical Rotation:**  $[\alpha]_D^{20} = -26.6$  ( $c = 1.0$ ,  $(\text{CH}_3)_2\text{CO}$ ); **Physical properties:** white solid; **Yield:** 96%, 37.0 mg.

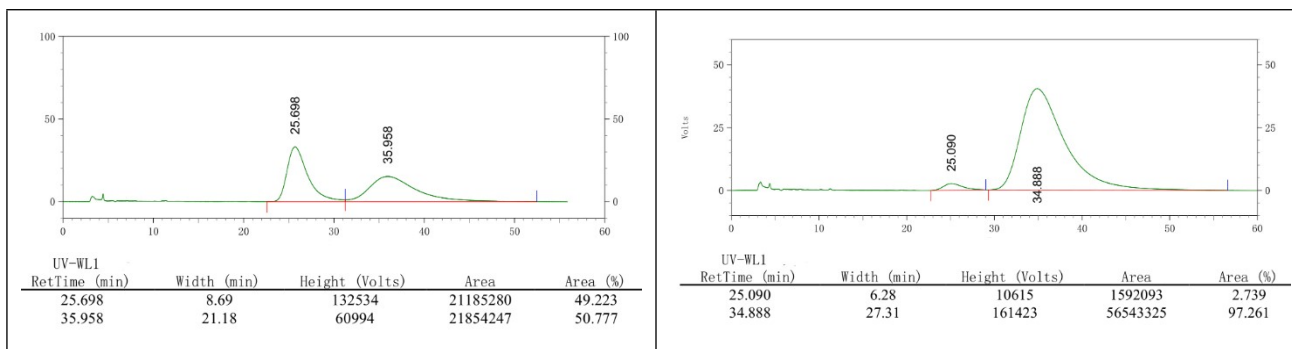

### 10-(2-hydroxynaphthalen-1-yl)-6-methylphenanthrene-1,3-diol (**2f**)

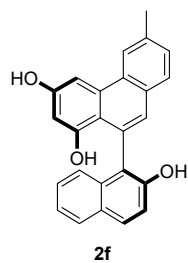

**$^1\text{H}$  NMR** (600 MHz,  $(\text{CD}_3)_2\text{CO}$ ):  $\delta$  8.56 (s, 1H), 8.45 (s, 1H), 7.90 (s, 1H), 7.83 (t,  $J = 9.4$  Hz, 3H), 7.74 (d,  $J = 8.0$  Hz, 1H), 7.54 (s, 1H), 7.44 (d,  $J = 7.9$  Hz, 1H), 7.28 (d,  $J = 8.7$  Hz, 2H), 7.24 (dt,  $J = 8.0, 3.9$  Hz, 1H), 7.19 (d,  $J = 3.6$  Hz, 2H), 6.53 (d,  $J = 2.0$  Hz, 1H), 2.61 (s, 3H).  **$^{13}\text{C}$  NMR** (150 MHz,  $(\text{CD}_3)_2\text{CO}$ ):  $\delta$  157.51, 157.20, 152.39, 136.63, 135.51, 135.00, 131.12, 130.51, 129.41, 129.20, 129.13, 128.96,

128.42, 127.87, 126.68, 125.65, 123.76, 123.57, 123.35, 119.01, 116.79, 103.12, 100.03, 21.98.

**HRMS (ESI)**  $m/z$  Calcd for  $[\text{C}_{25}\text{H}_{18}\text{NaO}_3, \text{M} + \text{Na}]^+$ : 389.1148, Found: 389.1011. **HPLC analysis:**

Chiralcel OD-H (Hexane/*i*-PrOH) = 80:20, flow rate = 1.0 mL/min, wave length = 254 nm,  $t_R = 10.482$  min (major),  $t_R = 13.911$  min (minor). **Optical Rotation:**  $[\alpha]_D^{20} = -36.2$  ( $c = 1.0$ ,  $(\text{CH}_3)_2\text{CO}$ );

**Physical properties:** white solid; **Yield:** 97%, 35.5 mg.

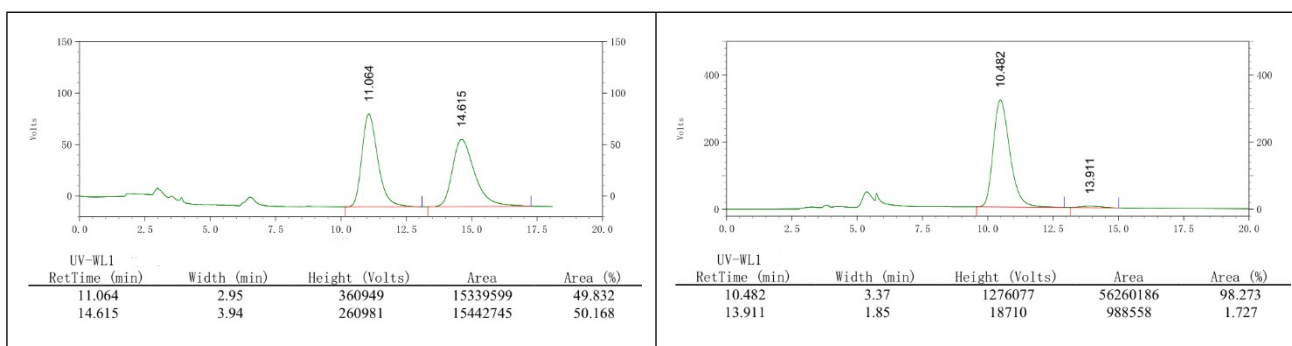

### 6-fluoro-10-(2-hydroxynaphthalen-1-yl)phenanthrene-1,3-diol (2g)

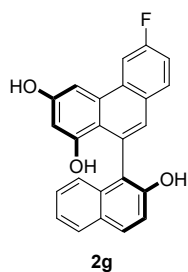

$^1\text{H NMR}$  (400 MHz,  $(\text{CD}_3)_2\text{CO}$ ):  $\delta$  8.77 (s, 1H), 8.36 – 8.28 (m, 1H), 7.99 (s, 1H), 7.90 – 7.78 (m, 3H), 7.67 (d,  $J = 7.8$  Hz, 1H), 7.54 (td,  $J = 7.8, 4.9$  Hz, 1H), 7.41 – 7.32 (m, 2H), 7.29 (d,  $J = 8.9$  Hz, 1H), 7.26 – 7.14 (m, 3H), 6.64 (s, 1H).  $^{13}\text{C NMR}$  (100 MHz,  $(\text{CD}_3)_2\text{CO}$ ):  $\delta$  162.07 (d,  $J = 242.0$  Hz), 157.71, 157.34, 152.29, 135.43, 134.61, (d,  $J = 4.0$  Hz), 131.79 (d,  $J = 8.0$  Hz), 131.43 (d,  $J = 9.0$  Hz), 130.02, 129.88 (d,  $J = 2.0$  Hz), 129.35, 129.15, 128.41, 127.31, 126.67, 125.56, 123.72, 123.31, 118.98, 116.96, 116.37 (d,  $J = 24.0$  Hz), 108.69 (d,  $J = 23.0$  Hz), 103.78, 100.27. **HRMS (ESI)**  $m/z$  Calcd for  $[\text{C}_{24}\text{H}_{15}\text{FNaO}_3, \text{M} + \text{Na}]^+$ : 393.0897, Found: 393.0841. **HPLC analysis:** Chiralcel OD-H (Hexane/*i*-PrOH) = 80:20, flow rate = 1.0 mL/min, wave length = 254 nm,  $t_R = 10.037$  min (major),  $t_R = 11.547$  min (minor). **Optical Rotation:**  $[\alpha]_D^{20} = -47.5$  ( $c = 1.0, (\text{CH}_3)_2\text{CO}$ ); **Physical properties:** white solid; **Yield:** 98%, 36.2 mg.

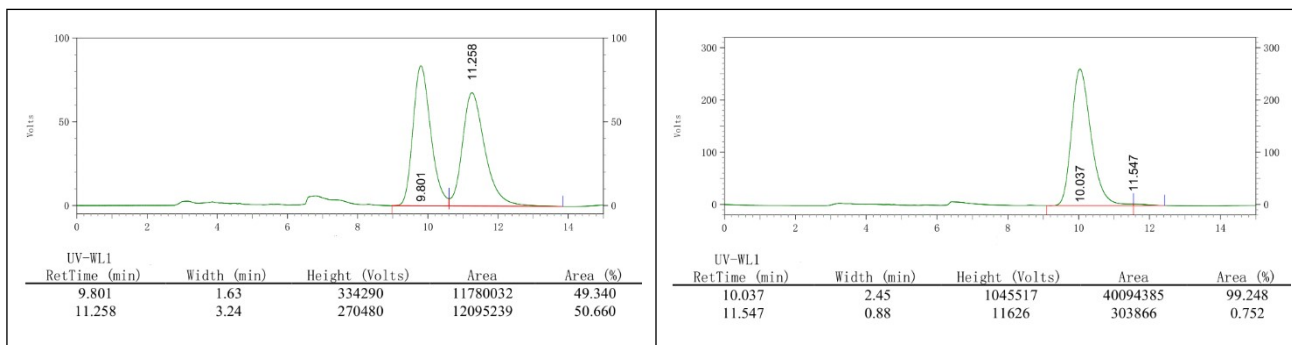

### 10-(2-hydroxynaphthalen-1-yl)-7-methylphenanthrene-1,3-diol (2h)

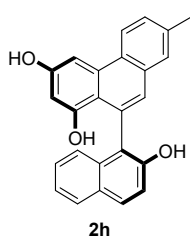

$^1\text{H NMR}$  (400 MHz,  $\text{DMSO}-d_6$ ):  $\delta$  9.57 (s, 1H), 9.04 (d,  $J = 12.4$  Hz, 2H), 8.45 (d,  $J = 8.6$  Hz, 1H), 7.77 (d,  $J = 7.7$  Hz, 1H), 7.72 (d,  $J = 8.8$  Hz, 1H), 7.62 – 7.56 (m, 2H), 7.43 (d,  $J = 8.5$  Hz, 1H), 7.22 (d,  $J = 8.8$  Hz, 1H), 7.20 – 7.11 (m, 2H), 7.11 – 7.05 (m, 2H), 6.32 (d,  $J = 1.8$  Hz, 1H), 2.48 (s, 3H).  $^{13}\text{C NMR}$  (100 MHz,  $(\text{CD}_3)_2\text{CO}$ ):  $\delta$  157.68, 157.26, 152.32, 137.14, 135.44, 135.28, 133.27, 130.30, 129.33, 129.14, 128.67, 128.42, 128.39, 128.32, 127.69, 126.62, 125.63, 123.88, 123.85, 123.29, 119.01, 116.32, 102.82, 99.74, 21.23. **HRMS (ESI)**  $m/z$  Calcd for  $[\text{C}_{25}\text{H}_{18}\text{NaO}_3, \text{M} + \text{Na}]^+$ : 389.1148, Found: 389.1112. **HPLC analysis:** Chiralcel OD-H (Hexane/*i*-PrOH) = 80:20, flow rate =

1.0 mL/min, wave length = 254 nm,  $t_R = 11.623$  min (major),  $t_R = 17.304$  min (minor). **Optical**

**Rotation:**  $[\alpha]_D^{20} = -72.7$  ( $c = 1.0$ ,  $(\text{CH}_3)_2\text{CO}$ ); **Physical properties:** white solid; **Yield:** 95%, 34.7 mg.

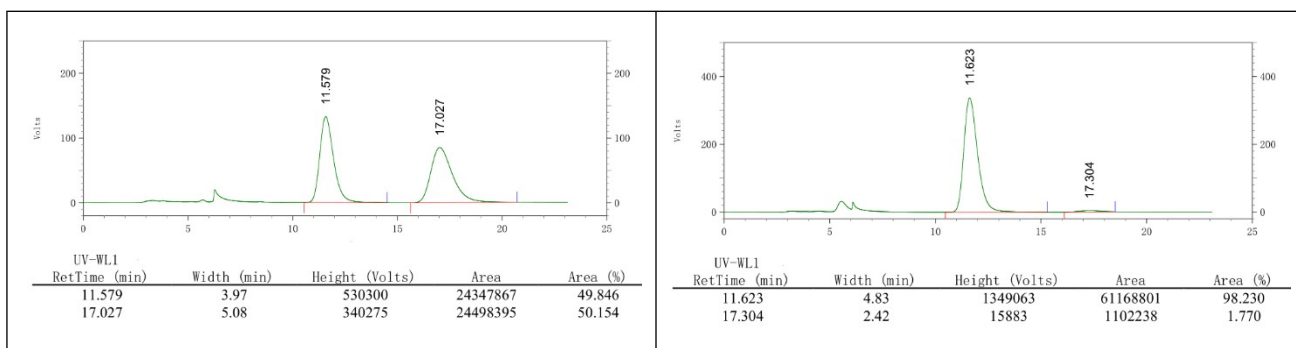

### 7-fluoro-10-(2-hydroxynaphthalen-1-yl)phenanthrene-1,3-diol (**2i**)

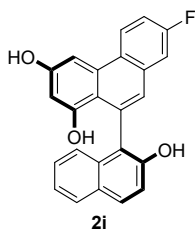

**<sup>1</sup>H NMR** (400 MHz,  $(\text{CD}_3)_2\text{CO}$ ):  $\delta$  8.70 (dd,  $J = 9.2, 5.4$  Hz, 2H), 7.99 (s, 1H), 7.83 (dd,  $J = 8.2, 4.7$  Hz, 2H), 7.81 – 7.74 (m, 2H), 7.58 (dd,  $J = 9.7, 2.6$  Hz, 1H), 7.43 (td,  $J = 8.9, 2.7$  Hz, 1H), 7.33 (s, 1H), 7.30 – 7.22 (m, 2H), 7.19 (dt,  $J = 5.7, 3.5$  Hz, 2H), 6.55 (d,  $J = 2.1$  Hz, 1H). **<sup>13</sup>C NMR** (100 MHz,  $(\text{CD}_3)_2\text{CO}$ ):  $\delta$  162.20

(d,  $J = 243.0$  Hz), 158.01, 157.46, 152.16, 135.32, 135.10, 134.68 (d,  $J = 9.0$  Hz), 132.29, 129.33, 129.14, 128.41, 127.14, 127.06 (d,  $J = 4.0$  Hz), 126.80 (d,  $J = 9.0$  Hz), 126.67, 125.54, 123.81, 123.30, 118.99, 116.41, 115.53 (d,  $J = 23.0$  Hz), 112.50 (d,  $J = 21.0$  Hz), 103.00, 99.88. **HRMS (ESI)**  $m/z$  Calcd for  $[\text{C}_{24}\text{H}_{15}\text{FNaO}_3, \text{M} + \text{Na}]^+$ : 393.0897, Found: 393.0831. **HPLC analysis:**

Chiralcel OD-H (Hexane/*i*-PrOH) = 80:20, flow rate = 1.0 mL/min, wave length = 254 nm,  $t_R = 10.061$  min (major),  $t_R = 15.955$  min (minor). **Optical Rotation:**  $[\alpha]_D^{20} = -53.6$  ( $c = 1.0$ ,  $(\text{CH}_3)_2\text{CO}$ );

**Physical properties:** white solid; **Yield:** 96%, 35.5 mg.

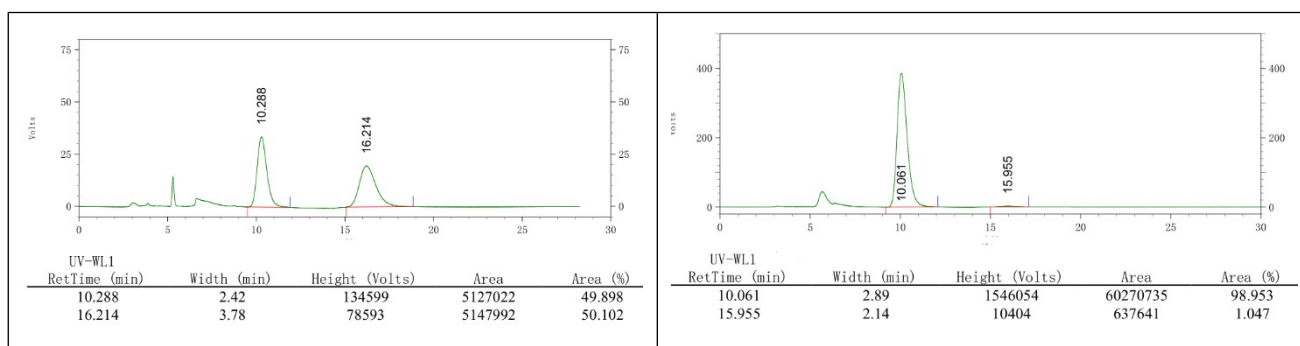

### 7-chloro-10-(2-hydroxynaphthalen-1-yl)phenanthrene-1,3-diol (2j)

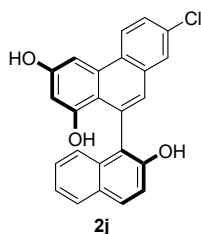

**<sup>1</sup>H NMR** (400 MHz, DMSO-*d*<sub>6</sub>): δ 9.66 (s, 1H), 9.16 (s, 1H), 9.02 (s, 1H), 8.56 (d, *J* = 8.9 Hz, 1H), 7.92 (s, 1H), 7.73 (dd, *J* = 20.0, 8.2 Hz, 2H), 7.57 (s, 2H), 7.15 (dq, *J* = 14.8, 7.8, 6.4 Hz, 4H), 7.04 (d, *J* = 8.0 Hz, 1H), 6.36 (s, 1H). **<sup>13</sup>C NMR** (100 MHz, (CD<sub>3</sub>)<sub>2</sub>CO): δ 158.03, 157.44, 152.12, 135.28, 134.84, 134.36, 132.76,

132.44, 129.29, 129.10, 128.80, 128.39, 127.59, 126.98, 126.65, 126.13, 125.51, 123.80, 123.28, 118.96, 116.77, 103.43, 99.94. **HRMS (ESI)** *m/z* Calcd for [C<sub>24</sub>H<sub>15</sub>ClNaO<sub>3</sub>, M + Na]<sup>+</sup>: 409.0602 Found: 409.0583. **HPLC analysis:** Chiralcel OD-H (Hexane/*i*-PrOH) = 80:20, flow rate = 1.0 mL/min, wave length = 254 nm, *t*<sub>R</sub> = 10.193 min (major), *t*<sub>R</sub> = 16.015 min (minor). **Optical**

**Rotation:** [α]<sub>D</sub><sup>20</sup> = -117.7 (*c* = 1.0, CH<sub>3</sub>OH); **Physical properties:** white solid; **Yield:** 98%, 37.8 mg.

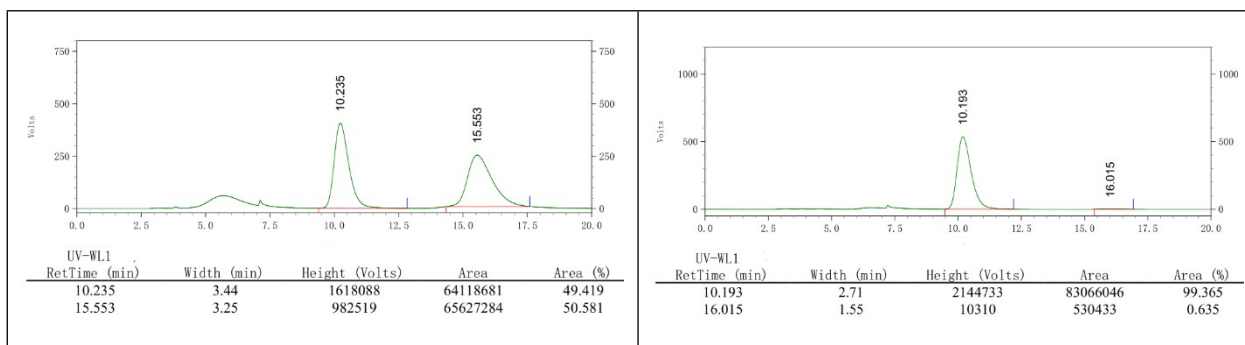

### 10-(2-hydroxynaphthalen-1-yl)-7-nitrophenanthrene-1,3-diol (2k)

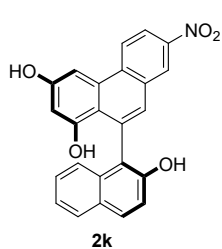

**<sup>1</sup>H NMR** (400 MHz, (CD<sub>3</sub>)<sub>2</sub>CO): δ 8.95 – 8.87 (m, 2H), 8.81 (d, *J* = 2.0 Hz, 1H), 8.39 (dd, *J* = 9.2, 2.1 Hz, 1H), 8.09 (d, *J* = 16.4 Hz, 2H), 7.93 – 7.89 (m, 1H), 7.84 (dd, *J* = 8.1, 3.2 Hz, 2H), 7.59 (s, 1H), 7.29 (d, *J* = 9.0 Hz, 1H), 7.27 – 7.23 (m, 1H), 7.21 (d, *J* = 3.4 Hz, 2H), 6.68 (d, *J* = 1.8 Hz, 1H). **<sup>13</sup>C NMR** (100 MHz, (CD<sub>3</sub>)<sub>2</sub>CO): δ 158.35, 157.64, 152.10, 146.94, 135.24, 134.33, 134.13, 133.86,

132.79, 129.32, 129.13, 128.44, 127.67, 126.68, 125.93, 125.45, 124.42, 123.74, 123.28, 120.09, 118.96, 118.18, 104.82, 100.94. **HRMS (ESI)** *m/z* Calcd for [C<sub>24</sub>H<sub>15</sub>NNaO<sub>5</sub>, M + Na]<sup>+</sup>: 420.0842, Found: 420.0811. **HPLC analysis:** Chiralcel OD-H (Hexane/*i*-PrOH) = 70:30, flow rate = 1.0 mL/min, wave length = 254 nm, *t*<sub>R</sub> = 8.594 min (major), *t*<sub>R</sub> = 11.589 min (minor). **Optical Rotation:**

[α]<sub>D</sub><sup>20</sup> = -44.8 (*c* = 1.0, (CH<sub>3</sub>)<sub>2</sub>CO); **Physical properties:** white solid; **Yield:** 94%, 37.3 mg.

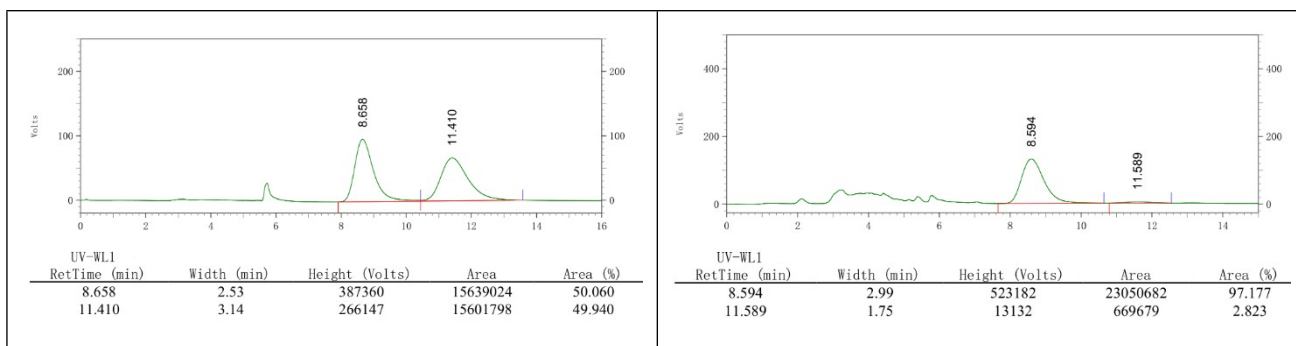

### 10-(2-hydroxynaphthalen-1-yl)-7-(trifluoromethyl)phenanthrene-1,3-diol (**2l**)

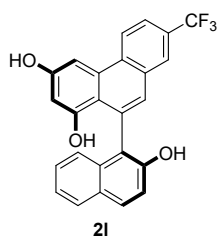

**<sup>1</sup>H NMR** (600 MHz, (CD<sub>3</sub>)<sub>2</sub>CO): δ 8.86 (d, *J* = 8.8 Hz, 1H), 8.80 (s, 1H), 8.27 (s, 1H), 7.98 (s, 1H), 7.92 – 7.87 (m, 3H), 7.84 (t, *J* = 8.0 Hz, 2H), 7.51 (s, 1H), 7.29 (d, *J* = 8.9 Hz, 1H), 7.25 (ddd, *J* = 8.1, 4.7, 3.2 Hz, 1H), 7.21 (d, *J* = 3.7 Hz, 2H), 6.64 (d, *J* = 2.2 Hz, 1H). **<sup>13</sup>C NMR** (100 MHz, CDCl<sub>3</sub>): δ 155.67, 155.41, 151.09, 133.74, 133.21, 131.78, 131.57, 130.90, 129.06 (q, *J* = 16.0 Hz), 128.93, 128.25,

127.74, 127.65, 125.71, 125.67, 125.64, 125.63, 124.43, 124.30, 124.06 (q, *J* = 272.0 Hz), 122.80, 118.33, 117.60, 115.36, 104.31 (d, *J* = 8.0 Hz), 101.26. **HRMS (ESI)** *m/z* Calcd for [C<sub>25</sub>H<sub>15</sub>F<sub>3</sub>NaO<sub>3</sub>, M + Na]<sup>+</sup>: 443.0866, Found: 443.0814. **HPLC analysis:** Chiralcel OD-H (Hexane/*i*-PrOH) = 80:20, flow rate = 1.0 mL/min, wave length = 254 nm, *t*<sub>R</sub> = 6.469 min (major), *t*<sub>R</sub> = 8.013 (minor). **Optical**

**Rotation:** [α]<sub>D</sub><sup>20</sup> = -58.2 (*c* = 1.0, (CH<sub>3</sub>)<sub>2</sub>CO); **Physical properties:** white solid; **Yield:** 94%, 39.4 mg.

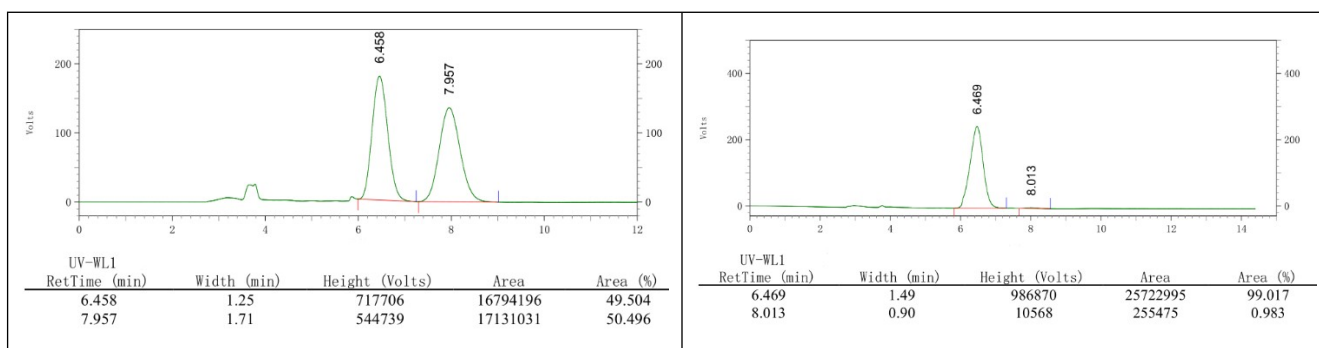

### 10-(2-hydroxynaphthalen-1-yl)-7-(trifluoromethoxy)phenanthrene-1,3-diol (**2m**)

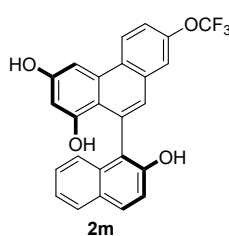

**<sup>1</sup>H NMR** (400 MHz, CDCl<sub>3</sub>): δ 8.36 (d, *J* = 9.1 Hz, 1H), 7.83 (d, *J* = 8.9 Hz, 1H), 7.75 (d, *J* = 8.0 Hz, 1H), 7.48 (d, *J* = 16.7 Hz, 2H), 7.29 (q, *J* = 9.9, 9.2 Hz, 3H), 7.21 (t, *J* = 7.4 Hz, 2H), 7.14 (d, *J* = 8.5 Hz, 1H), 6.31 (s, 1H), 6.06 (s, 1H), 5.80 (s, 1H), 5.52 (s, 1H). **<sup>13</sup>C NMR** (100 MHz, CDCl<sub>3</sub>): δ 155.75, 155.57, 151.24, 148.08, 134.05, 133.17, 132.45, 131.66, 128.92, 128.27, 127.91, 127.78,



127.51, 125.63, 124.44, 120.5 (q,  $J = 256.0$  Hz), 120.40, 118.64, 118.06, 117.63, 114.66, 103.67, 100.83. **HRMS (ESI)**  $m/z$  Calcd for  $[C_{25}H_{15}F_3NaO_4, M + Na]^+$ : 459.0815, Found: 459.0796. **HPLC analysis**: Chiralcel OD-H (Hexane/*i*-PrOH) = 80:20, flow rate = 1.0 mL/min, wave length = 254 nm,  $t_R = 6.056$  min (major),  $t_R = 7.913$  (minor). **Optical Rotation**:  $[\alpha]_D^{20} = -61.7$  ( $c = 1.0$ ,  $(CH_3)_2CO$ ); **Physical properties**: white solid; **Yield**: 96%, 41.8 mg.

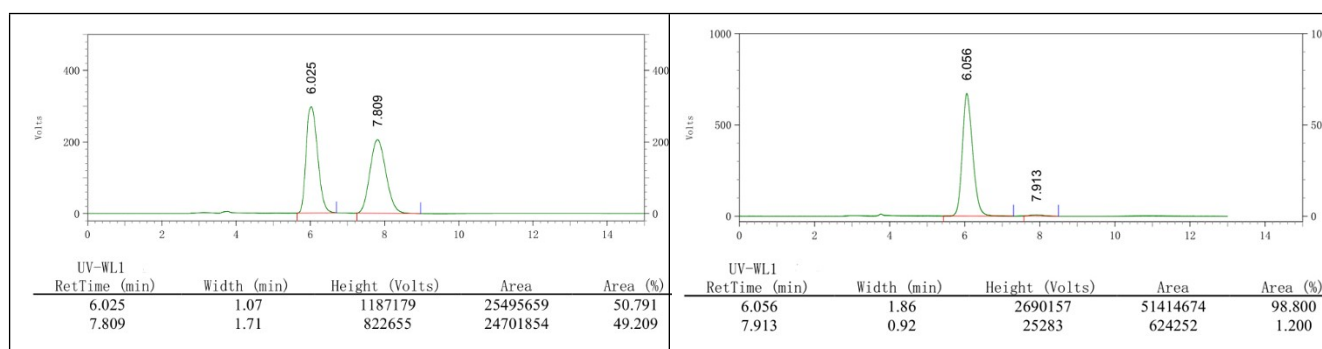

### 10-(2-hydroxynaphthalen-1-yl)-6,7-dimethylphenanthrene-1,3-diol (2n)

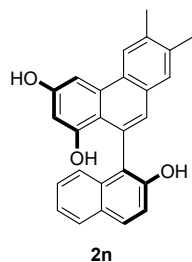

**$^1H$  NMR** (400 MHz,  $(CD_3)_2CO$ ):  $\delta$  8.57 (s, 1H), 8.41 (s, 1H), 7.90 (s, 1H), 7.82 (dd,  $J = 14.6, 8.3$  Hz, 3H), 7.59 (s, 1H), 7.52 (s, 1H), 7.31 – 7.22 (m, 3H), 7.19 (d,  $J = 3.4$  Hz, 2H), 6.50 (s, 1H), 2.54 (s, 3H), 2.44 (s, 3H).  **$^{13}C$  NMR** (100 MHz,  $(CD_3)_2CO$ ):  $\delta$  157.46, 157.17, 152.36, 136.82, 136.22, 135.52, 135.01, 131.72, 129.36, 129.18, 129.05, 129.00, 128.87, 128.40, 127.55, 126.64, 125.67, 124.14,

123.85, 123.32, 119.00, 116.37, 102.71, 99.78, 20.46, 19.72. **HRMS (ESI)**  $m/z$  Calcd for  $[C_{26}H_{20}NaO_3, M + Na]^+$ : 403.1305, Found: 403.1283. **HPLC analysis**: Chiralcel OD-H (Hexane/*i*-PrOH) = 80:20, flow rate = 1.0 mL/min, wave length = 254 nm,  $t_R = 12.634$  min (major),  $t_R = 18.841$  min (minor). **Optical Rotation**:  $[\alpha]_D^{20} = -52.1$  ( $c = 1.0$ ,  $(CH_3)_2CO$ ); **Physical properties**: white solid; **Yield**: 97%, 36.8 mg.

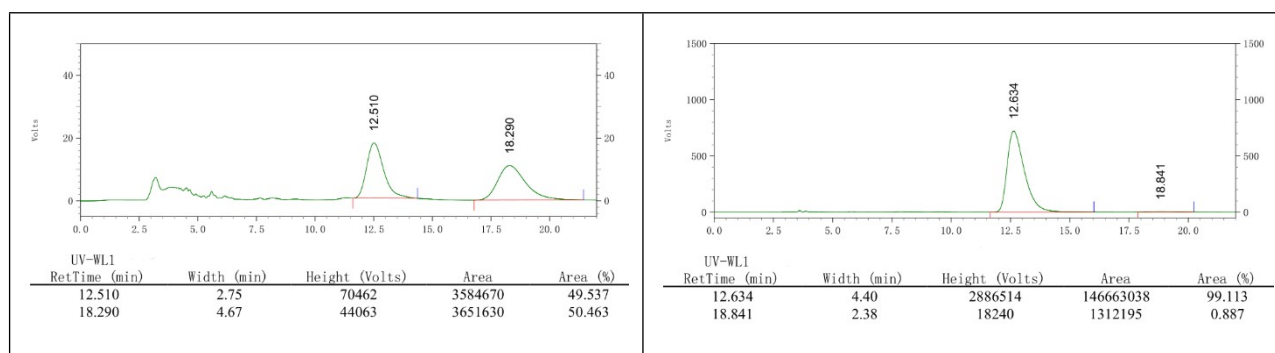

### 6,7-difluoro-10-(2-hydroxynaphthalen-1-yl)phenanthrene-1,3-diol (**2o**)

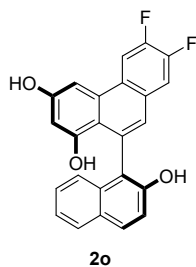

**<sup>1</sup>H NMR** (400 MHz, CDCl<sub>3</sub>): δ 7.93 (s, 1H), 7.74 (dd, *J* = 26.9, 6.8 Hz, 2H), 7.20 (q, *J* = 24.0, 23.6 Hz, 7H), 6.24 (s, 2H), 6.06 (s, 1H), 5.75 (s, 1H). **<sup>13</sup>C NMR** (100 MHz, CDCl<sub>3</sub>): δ 155.37, 155.25, 151.27, 150.135 (dd, *J* = 247.0, 20.0 Hz), 150.05 (dd, *J* = 246.0, 16.0 Hz), 133.45 (d, *J* = 2.0 Hz), 133.24, 131.43, 128.88, 128.59 (d, *J* = 6.0 Hz), 128.19, 127.65, 127.09, 126.81, 126.75, 126.67, 124.39 (d, *J* = 4.0 Hz),

118.49, 117.54, 114.67, 114.49, 111.08 (d, *J* = 8.0 Hz), 103.57, 100.81. **HRMS (ESI)** *m/z* Calcd for [C<sub>24</sub>H<sub>14</sub>F<sub>2</sub>NaO<sub>3</sub>, M + Na]<sup>+</sup>: 411.0803, Found: 411.0789. **HPLC analysis:** Chiralcel OD-H (Hexane/*i*-PrOH) = 80:20, flow rate = 1.0 mL/min, wave length = 254 nm, *t<sub>R</sub>* = 9.499 min (major),

*t<sub>R</sub>* = 11.650 min (minor). **Optical Rotation:** [α]<sub>D</sub><sup>20</sup> = -50.1 (*c* = 1.0, (CH<sub>3</sub>)<sub>2</sub>CO); **Physical properties:** white solid; **Yield:** 95%, 36.8 mg.

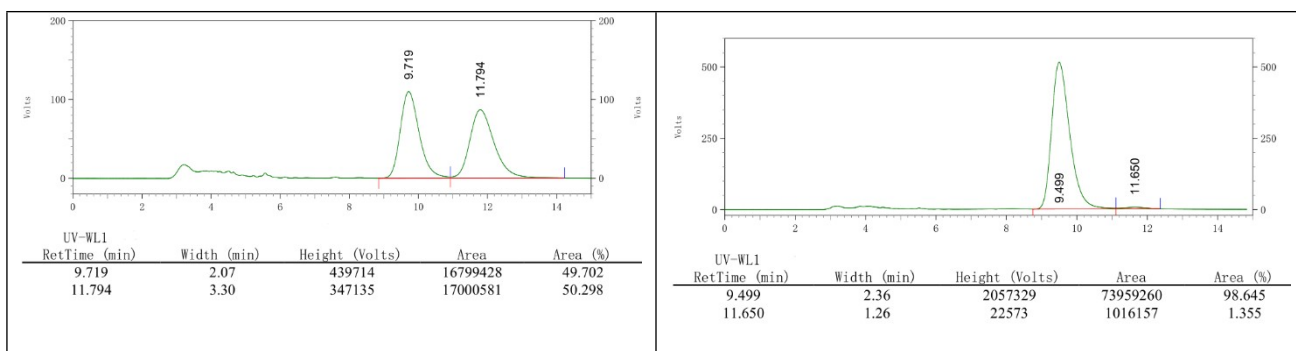

### 7-chloro-5-fluoro-10-(2-hydroxynaphthalen-1-yl)phenanthrene-1,3-diol (**2p**)

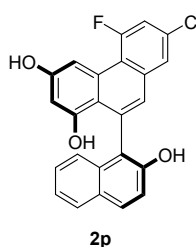

**<sup>1</sup>H NMR** (400 MHz, (CD<sub>3</sub>)<sub>2</sub>CO): δ 8.81 (s, 1H), 8.21 – 8.16 (m, 1H), 8.01 (d, *J* = 14.0 Hz, 2H), 7.86 – 7.77 (m, 3H), 7.46 (dd, *J* = 14.4, 1.9 Hz, 1H), 7.34 (d, *J* = 1.7 Hz, 1H), 7.22 (dt, *J* = 24.5, 8.7 Hz, 4H), 6.64 – 6.60 (m, 1H). **<sup>13</sup>C NMR** (100 MHz, (CD<sub>3</sub>)<sub>2</sub>CO): δ 161.95 (d, *J* = 255.0 Hz), 158.26, 157.20, 151.92, 136.77 (d, *J* = 5.0 Hz), 135.15, 134.03, 132.50 (d, *J* = 5.0 Hz), 131.92 (d, *J* = 12.0 Hz), 129.20,

129.12, 128.41, 126.65, 126.56 (d, *J* = 3.0 Hz), 125.46, 124.15 (d, *J* = 3.0 Hz), 123.97, 123.27, 118.95, 118.13 (d, *J* = 7.0 Hz), 117.23, 114.11 (d, *J* = 30.0 Hz), 104.72 (d, *J* = 26.0 Hz), 103.72. **HRMS (ESI)** *m/z* Calcd for [C<sub>24</sub>H<sub>14</sub>ClFNaO<sub>3</sub>, M + Na]<sup>+</sup>: 427.0508, Found: 427.0496. **HPLC analysis:** Chiralcel OD-H (Hexane/*i*-PrOH) = 80:20, flow rate = 1.0 mL/min, wave length = 254 nm,

$t_R = 8.936$  min (major),  $t_R = 10.234$  min (minor). **Optical Rotation:**  $[\alpha]_D^{20} = -81.0$  ( $c = 1.0$ ,  $(\text{CH}_3)_2\text{CO}$ ); **Physical properties:** white solid; **Yield:** 98%, 39.6 mg.

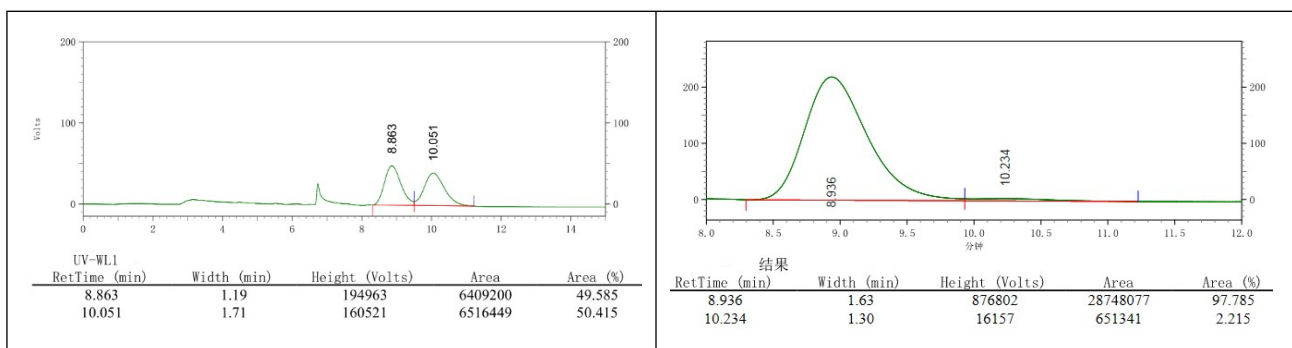

### 10-(2-hydroxy-3-methoxynaphthalen-1-yl)phenanthrene-1,3-diol (2q)

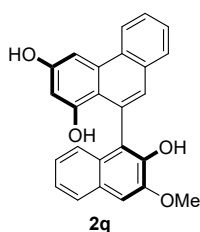

**$^1\text{H}$  NMR** (400 MHz,  $(\text{CD}_3)_2\text{CO}$ ):  $\delta$  8.73 – 8.62 (m, 2H), 7.84 (t,  $J = 6.5$  Hz, 2H), 7.74 (t,  $J = 10.3$  Hz, 2H), 7.61 (ddt,  $J = 17.9, 7.1, 2.7$  Hz, 3H), 7.36 (s, 1H), 7.32 (d,  $J = 3.8$  Hz, 1H), 7.21 (dt,  $J = 13.7, 6.0$  Hz, 2H), 7.09 (ddt,  $J = 8.1, 6.7, 1.3$  Hz, 1H), 6.57 (d,  $J = 4.3$  Hz, 1H), 4.02 (s, 3H).  **$^{13}\text{C}$  NMR** (100 MHz,  $(\text{CD}_3)_2\text{CO}$ ):  $\delta$  157.53, 157.24, 148.89, 144.27, 135.08, 133.10, 130.93, 130.70, 130.22, 129.42, 128.88, 127.49, 127.27, 126.80, 125.52, 124.43, 124.39, 123.89, 116.68, 106.00, 103.18, 103.14, 99.93, 56.00. **HRMS (ESI)**  $m/z$  Calcd for  $[\text{C}_{25}\text{H}_{18}\text{NaO}_4, \text{M} + \text{Na}]^+$ : 405.1097, Found: 405.1010. **HPLC analysis:** Chiralcel AS-H (Hexane/*i*-PrOH) = 70:30, flow rate = 1.0 mL/min, wave length = 254 nm,  $t_R = 22.522$  min (minor),  $t_R = 25.203$  min (major). **Optical Rotation:**  $[\alpha]_D^{20} = -79.9$  ( $c = 1.0$ ,  $(\text{CH}_3)_2\text{CO}$ ); **Physical properties:** white solid; **Yield:** 98%, 37.4 mg.

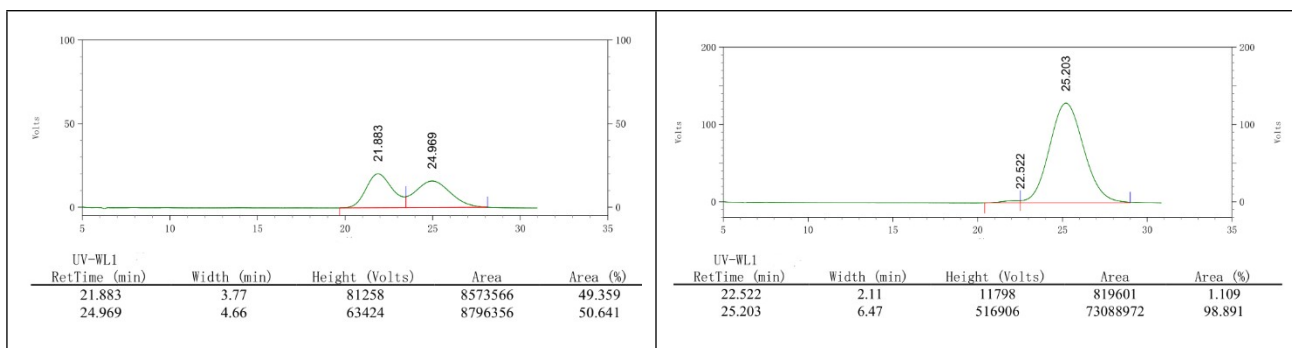

### 10-(2-hydroxy-6-phenylnaphthalen-1-yl)phenanthrene-1,3-diol (2r)

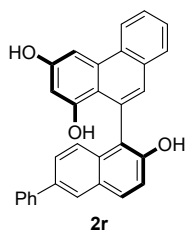

**$^1\text{H}$  NMR** (400 MHz,  $\text{CDCl}_3$ ):  $\delta$  8.41 (d,  $J = 8.0$  Hz, 1H), 7.94 (s, 1H), 7.88 (d,  $J = 8.9$  Hz, 1H), 7.66 (d,  $J = 7.4$  Hz, 1H), 7.62 (s, 1H), 7.55 – 7.41 (m, 5H), 7.34 (t,  $J =$

7.2 Hz, 3H), 7.24 (t,  $J = 8.8$  Hz, 3H), 6.37 (s, 1H), 6.05 (s, 1H), 5.57 (s, 2H).  $^{13}\text{C}$  NMR (100 MHz,  $\text{CDCl}_3$ ):  $\delta$  155.51, 151.41, 140.60, 137.07, 134.59, 132.48, 131.66, 131.55, 129.99, 129.16, 128.84, 128.81, 128.46, 127.48, 127.37, 127.27, 127.19, 126.08, 125.42, 125.15, 123.41, 118.48, 118.04, 114.66, 103.46, 100.78. **HRMS (ESI)**  $m/z$  Calcd for  $[\text{C}_{30}\text{H}_{20}\text{NaO}_3, \text{M} + \text{Na}]^+$ : 451.1305, Found: 451.1278. **HPLC analysis:** Chiralcel OD-H (Hexane/*i*-PrOH) = 80:20, flow rate = 1.0 mL/min, wave length = 254 nm,  $t_R = 12.239$  min (major),  $t_R = 19.128$  (minor). **Optical Rotation:**  $[\alpha]_D^{20} = -37.4$  ( $c = 1.0$ ,  $(\text{CH}_3)_2\text{CO}$ ); **Physical properties:** white solid; **Yield:** 97%, 41.5 mg.

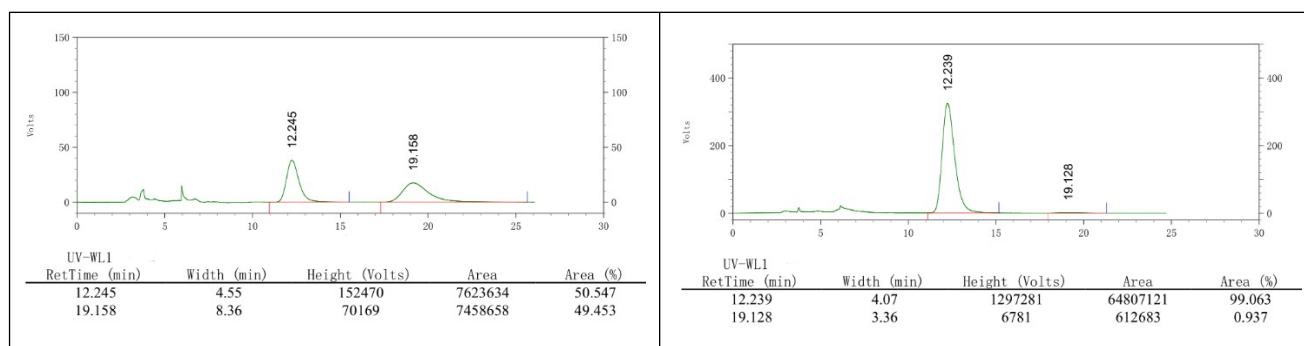

### 5-(6,8-dihydroxyphenanthren-9-yl)-6-hydroxy-2-naphthonitrile (2s)

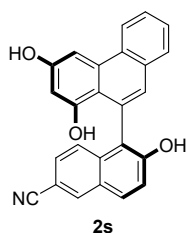

$^1\text{H}$  NMR (600 MHz,  $(\text{CD}_3)_2\text{CO}$ ):  $\delta$  8.67 (s, 1H), 8.64 (d,  $J = 8.3$  Hz, 1H), 8.33 (d,  $J = 6.2$  Hz, 2H), 8.22 (s, 1H), 7.95 (d,  $J = 8.9$  Hz, 1H), 7.86 (d,  $J = 7.7$  Hz, 1H), 7.82 (d,  $J = 2.2$  Hz, 1H), 7.68 – 7.64 (m, 1H), 7.63 – 7.59 (m, 1H), 7.41 – 7.37 (m, 2H), 7.35 (s, 2H), 6.57 (d,  $J = 2.2$  Hz, 1H).  $^{13}\text{C}$  NMR (150 MHz,  $\text{CDCl}_3$ ):  $\delta$  155.77, 155.28, 153.76, 135.30, 134.85, 134.14, 131.50, 131.32, 130.12, 129.14, 128.59, 127.95, 127.77, 127.75, 127.69, 125.98, 124.46, 123.45, 120.25, 119.55, 119.19, 114.55, 107.40, 103.61, 100.98. **HRMS (ESI)**  $m/z$  Calcd for  $[\text{C}_{25}\text{H}_{15}\text{NaO}_3, \text{M} + \text{Na}]^+$ : 400.0944 Found: 400.0853.

**HPLC analysis:** Chiralcel OD-H (Hexane/*i*-PrOH) = 75:15, flow rate = 1.0 mL/min, wave length = 254 nm,  $t_R = 10.389$  min (major),  $t_R = 17.421$  (minor). **Optical Rotation:**  $[\alpha]_D^{20} = -3.0$  ( $c = 1.0$ ,  $(\text{CH}_3)_2\text{CO}$ ); **Physical properties:** white solid; **Yield:** 98%, 36.9 mg.

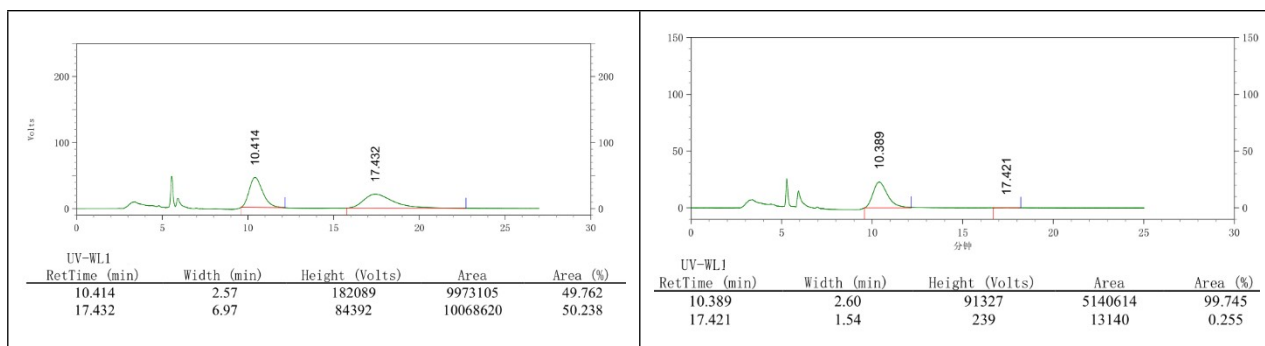

### 10-(6-hydroxyquinolin-5-yl)phenanthrene-1,3-diol (2t)

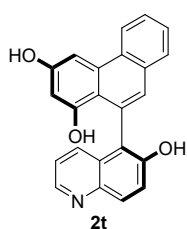

**<sup>1</sup>H NMR** (600 MHz, DMSO-*d*<sub>6</sub>) δ 9.64 (s, 1H), 9.32 (s, 1H), 9.19 (s, 1H), 8.58 – 8.52 (m, 2H), 7.84 (d, *J* = 9.1 Hz, 1H), 7.80 (d, *J* = 7.6 Hz, 1H), 7.61 (d, *J* = 1.9 Hz, 1H), 7.59 (t, *J* = 7.4 Hz, 1H), 7.54 (t, *J* = 7.3 Hz, 1H), 7.46 (d, *J* = 8.5 Hz, 1H), 7.43 (d, *J* = 9.1 Hz, 1H), 7.20 (s, 1H), 7.15 (dd, *J* = 8.6, 4.0 Hz, 1H), 6.36 (d, *J* = 1.9 Hz, 1H). **<sup>13</sup>C NMR** (150 MHz, DMSO-*d*<sub>6</sub>): δ 156.83, 156.56, 151.12, 146.25, 142.80, 133.85, 132.83, 131.91, 130.38, 129.40, 128.99, 128.11, 127.95, 126.77, 126.14, 125.69, 125.31, 123.15, 121.43, 120.73, 115.79, 102.24, 98.41. **HRMS (ESI)** *m/z* Calcd for [C<sub>23</sub>H<sub>15</sub>NNaO<sub>3</sub>, M + Na]<sup>+</sup>: 376.0944, Found: 376.0912. **HPLC analysis:** Chiralcel OD-H (Hexane/*i*-PrOH) = 70:30, flow rate = 1.0 mL/min, wave length = 254 nm, *t*<sub>R</sub> = 5.603 min (major), *t*<sub>R</sub> = 6.413 (minor). **Optical Rotation:** [α]<sub>D</sub><sup>20</sup> = -23.2 (*c* = 1.0, (CH<sub>3</sub>)<sub>2</sub>CO); **Physical properties:** white solid; **Yield:** 95%, 33.5 mg.

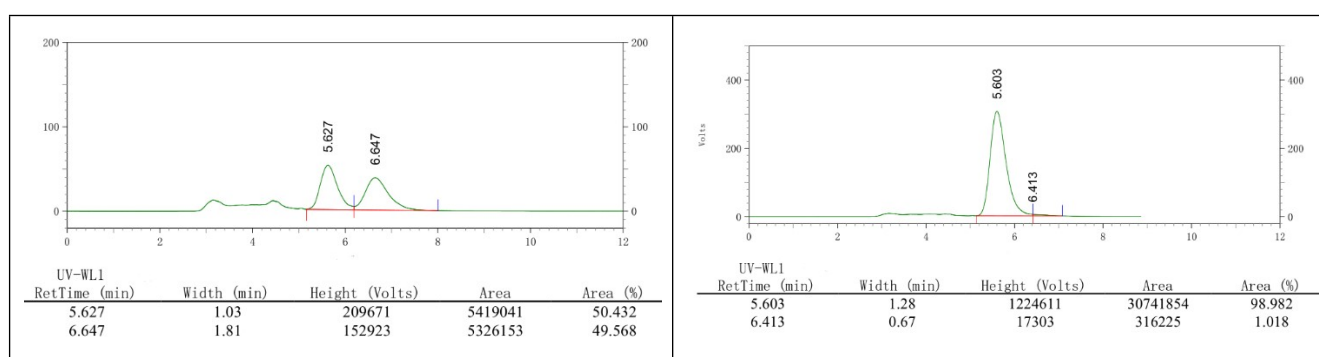

### 10-(2-hydroxynaphthalen-1-yl)-3-methoxyphenanthren-1-ol (2u)

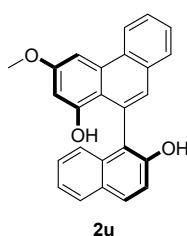

**<sup>1</sup>H NMR** (600 MHz, CDCl<sub>3</sub>): δ 8.66 (d, *J* = 8.4 Hz, 1H), 7.95 (d, *J* = 9.0 Hz, 1H), 7.87 – 7.84 (m, 2H), 7.79 (d, *J* = 7.7 Hz, 1H), 7.70 (t, *J* = 7.2 Hz, 1H), 7.62 (t, *J* = 7.4 Hz, 1H), 7.45 (s, 1H), 7.39 – 7.34 (m, 2H), 7.33 – 7.27 (m, 2H), 6.63 (d, *J* = 2.4

Hz, 1H), 6.03 (s, 1H), 5.41 (s, 1H), 3.96 (s, 3H).  $^{13}\text{C}$  NMR (150 MHz,  $\text{CDCl}_3$ ):  $\delta$  159.58, 155.69, 151.62, 134.34, 133.36, 131.63, 131.51, 130.31, 128.94, 128.88, 128.54, 128.22, 127.69, 127.41, 127.38, 125.44, 124.59, 124.33, 123.39, 118.22, 117.66, 114.78, 102.59, 98.70, 55.45. **HRMS (ESI)**  $m/z$  Calcd for  $[\text{C}_{25}\text{H}_{18}\text{NaO}_3, \text{M} + \text{Na}]^+$ : 389.1148, Found: 389.1135. **HPLC analysis:** Chiralcel OD-H (Hexane/*i*-PrOH) = 80:20, flow rate = 1.0 mL/min, wave length = 254 nm,  $t_R$  = 11.262 min (major),  $t_R$  = 15.782 (minor). **Optical Rotation:**  $[\alpha]_D^{20} = -38.2$  ( $c = 1.0$ ,  $(\text{CH}_3)_2\text{CO}$ ); **Physical properties:** white solid; **Yield:** 70 %, 25.6 mg.

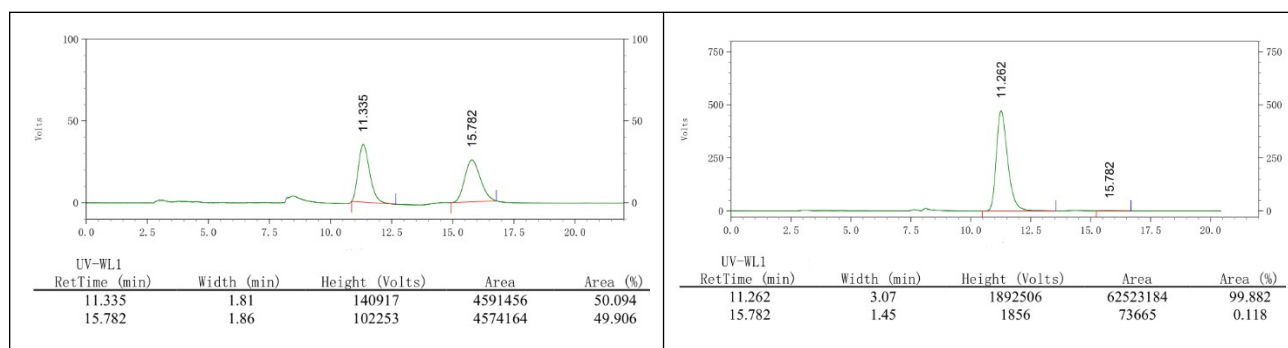

### 1-(6,8-dimethoxyphenanthren-9-yl)naphthalen-2-ol (2v)

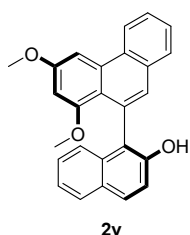

$^1\text{H}$  NMR (600 MHz,  $\text{CDCl}_3$ ):  $\delta$  8.65 (d,  $J = 8.4$  Hz, 1H), 7.83 – 7.75 (m, 4H), 7.68 (t,  $J = 7.5$  Hz, 1H), 7.60 (t,  $J = 7.3$  Hz, 1H), 7.55 (s, 1H), 7.29 (d,  $J = 8.9$  Hz, 1H), 7.25 (t,  $J = 7.0$  Hz, 1H), 7.15 (q,  $J = 8.5$  Hz, 2H), 6.51 (s, 1H), 5.08 (s, 1H), 3.97 (s, 3H), 3.09 (s, 3H).  $^{13}\text{C}$  NMR (150 MHz,  $\text{CDCl}_3$ ):  $\delta$  159.24, 158.77, 149.02, 134.18, 133.99, 132.08, 129.84, 129.04, 128.59, 128.40, 127.96, 127.89, 127.65, 127.23, 126.90, 125.76, 124.89, 124.72, 123.17, 122.72, 117.89, 117.01, 99.40, 96.61, 55.79, 55.38. **HRMS (ESI)**  $m/z$  Calcd for  $[\text{C}_{26}\text{H}_{20}\text{NaO}_3, \text{M} + \text{Na}]^+$ : 403.1305, Found: 403.1295. **HPLC analysis:** Chiralcel OD-H (Hexane/*i*-PrOH) = 80:20, flow rate = 1.0 mL/min, wave length = 254 nm,  $t_R$  = 8.387 min (minor),  $t_R$  = 13.878 (major). **Optical Rotation:**  $[\alpha]_D^{20} = -52.0$  ( $c = 1.0$ ,  $(\text{CH}_3)_2\text{CO}$ ); **Physical properties:** white solid; **Yield:** 85 %, 32.3 mg.

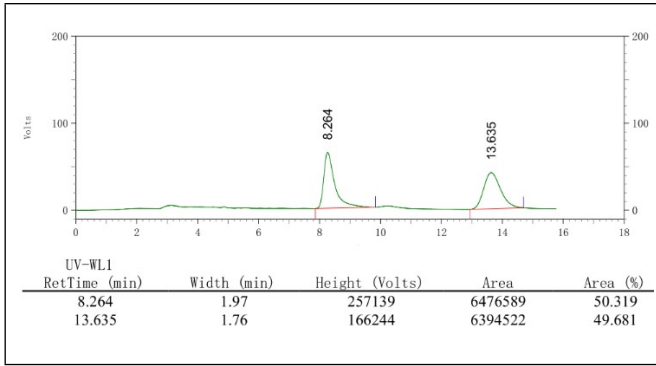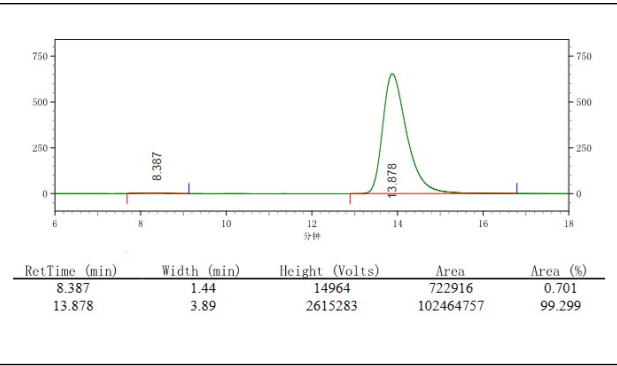

## VIII. General information

$^1\text{H}$  and  $^{13}\text{C}$  NMR spectra were recorded on Agilent 400MR DD2 (400 MHz) spectrometer and Agilent 600MR DD2 (600 MHz) spectrometer. Chemical shifts were reported in parts per million (ppm), and tetramethylsilane or the residual solvent peak was used as an internal reference:  $^1\text{H}$  (tetramethylsilane  $\delta$  0.00),  $^{13}\text{C}$  (chloroform  $\delta$  77.00, acetone  $\delta$  29.70, DMSO  $\delta$  39.60). Data are reported as follows: chemical shift, multiplicity (s = singlet, d = doublet, t = triplet, q = quartet, m = multiplet, br = broad), coupling constants (Hz) and integration. Enantiomeric excesses (*ee*) were determined by HPLC analysis on Hitachi Chromaster using DAICEL CHIRALCEL AD-H, 4.6mm  $\Phi \times 250\text{mmL}$ , DAICEL CHIRALCEL OD-H, 4.6mm  $\Phi \times 250\text{mmL}$  and DAICEL CHIRALCEL OJ-H, 4.6mm  $\Phi \times 250\text{mmL}$ . High resolution mass spectra (HRMS) were performed on Bruker Solarix 7.0 T. X-ray crystallography analysis of single crystal was performed on an Agilent SuperNova-CCD X-Ray diffractometer. Optical rotations were measured on a Rudolph Autopol I polarimeter and are reported as follows:  $[\alpha]_D^{20}$  (*c* in g per 100 mL solvent). All fluorescence spectra were measured using a Hitachi F-7000 FL spectrophotometer. Unless otherwise stated, all reagents were purchased from commercial suppliers and used without further purification.

## IX. Scale-up experiment and transformation.

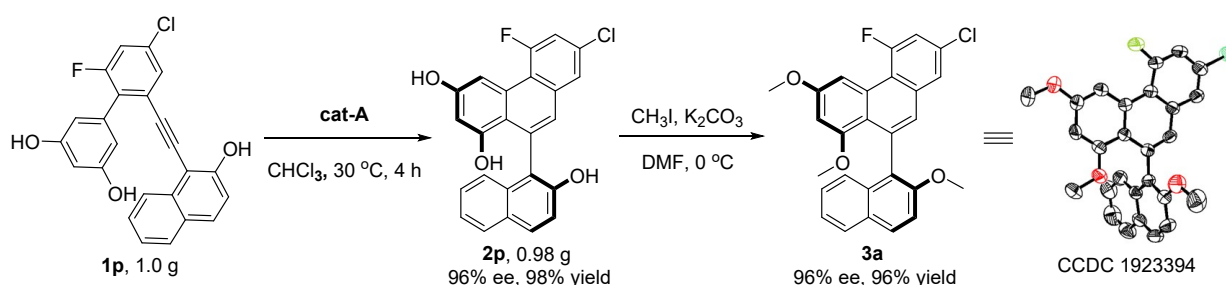

**General procedure for scale-up experiment:** To a solution of **1p** (1.0 g, 2.47 mmol) and **cat-A** (10 mol %) in  $\text{CHCl}_3$  (50.0 mL). The mixture was stirred at  $30\text{ }^\circ\text{C}$  for 4 h. Then the reaction mixture was concentrated under the reduced pressure and purified by silica gel chromatography (PE: Acetone = 2:1) to afford the product **2p** (0.98 g, 98% yield, 96% ee) as white solid.

**General procedure for synthesis 3a:** To an oven-dried round-bottom flask equipped with a stirring bar was added  $\text{K}_2\text{CO}_3$  (0.4 mmol, 55.2 mg) under nitrogen atmosphere. The flask was cooled to  $0\text{ }^\circ\text{C}$ , and anhydrous  $\text{DMF}$  (2.5 mL) was added. **2p** (0.1 mmol, 40.4 mg) was added slowly during stirring



at 0 °C. The resulting clear solution was stirred during the rapid addition of iodomethane (0.4 mmol, 24.9  $\mu$ L). The reaction mixture was allowed to stir at room temperature for 3 h. The reaction was quenched with water and extracted with EtOAc. The combined organic phase was washed with 10% NaOH, water, and brine, then dried over MgSO<sub>4</sub> and concentrated. The crude product was purified by column chromatography (PE:EA = 25:1) to give product **3a** as white solid.

### 7-chloro-5-fluoro-1,3-dimethoxy-10-(2-methoxynaphthalen-1-yl)phenanthrene (**3a**)

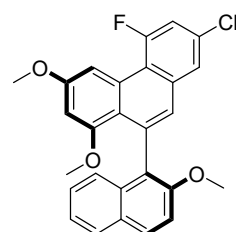

<sup>1</sup>H NMR (400 MHz, CDCl<sub>3</sub>):  $\delta$  8.34 – 8.26 (m, 1H), 7.88 (dd,  $J$  = 13.8, 8.7 Hz, 2H), 7.60 (s, 1H), 7.43 – 7.28 (m, 4H), 7.23 (d,  $J$  = 5.8 Hz, 2H), 6.60 (s, 1H), 4.02 (s, 3H), 3.79 (s, 3H), 3.13 (s, 3H). <sup>13</sup>C NMR (100 MHz, CDCl<sub>3</sub>):  $\delta$  161.2 (d,  $J$  = 256.0 Hz), 159.10, 158.30, 152.78, 135.39 (d,  $J$  = 4.0 Hz), 133.49 (d,  $J$  = 4.0 Hz), 131.56 (d,  $J$  = 13.0 Hz), 131.40 (d,  $J$  = 6.0 Hz), 128.58 (d,  $J$  = 9.0 Hz), 127.77, 127.60, 126.37, 125.81, 125.23, 123.50 (d,  $J$  =

4.0 Hz), 123.14, 119.00, 117.44, (d,  $J$  = 7.0 Hz), 113.76, 113.72, 113.46, 101.34, 101.06, 99.98, 56.84, 55.74, 55.31. **HRMS (ESI)**  $m/z$  Calcd for [C<sub>27</sub>H<sub>20</sub>ClFNaO<sub>3</sub>, M+ Na]<sup>+</sup>: 469.0977, Found: 469.0975. **HPLC analysis:** Chiralcel OD-H (Hexane/*i*-PrOH) = 80:20, flow rate = 1.0 mL/min, wave length = 254 nm,  $t_R$  = 4.735 min (minor),

$t_R$  = 5.272 min (major). **Optical Rotation:**  $[\alpha]_D^{20}$  = -101.3 ( $c$  = 1.0, (CH<sub>3</sub>)<sub>2</sub>CO); **Physical properties:** white solid;

**Yield:** 96%, 42.8 mg.

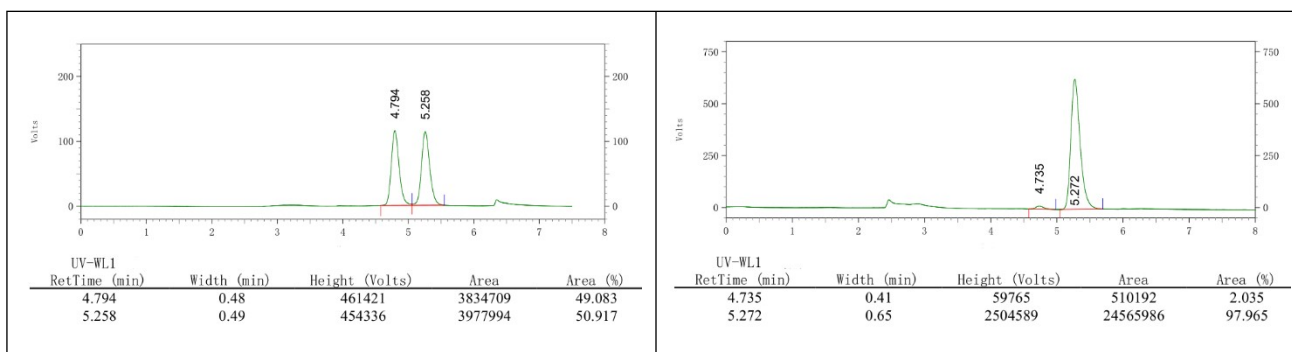

## X. Nonsymmetric axial chiral biaryltriols were used in asymmetric synthesis.

### a) **2p** applied as chiral ligand for enantioselective preparation of chiral *sec*-alcohols.

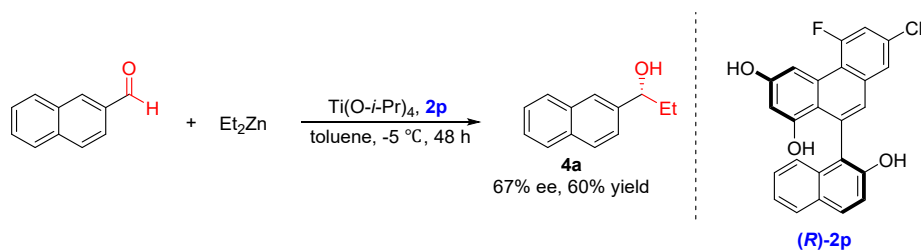

Titanium tetraisopropoxide (0.6 mmol) was added to a solution of **2p** (0.2 mmol) in toluene (1 mL) at -5 °C under argon and the mixture was stirred for 1 h followed by addition of diethylzinc (0.6 mL, 1.0 mol/L solution in hexane). After 2 h, 2-naphthylaldehyde (0.2 mmol) in toluene (1 mL) was added and the mixture was stirred at -5 °C. When TLC analysis indicated the completion of reaction (about 48 h), the reaction was quenched with 2 mL of saturated NH<sub>4</sub>Cl solution, the organic layer was separated and the water layer was extracted with EA. The organic layer and extraction were combined. The combined solution was dried over anhydrous Na<sub>2</sub>SO<sub>4</sub> and concentrated under reduced pressure and the residue was purified by column chromatography on silica gel to obtain the addition product. The absolute configuration was determined by comparison with the references.<sup>2</sup>

### 1-(naphthalen-2-yl)propan-1-ol (**4a**)

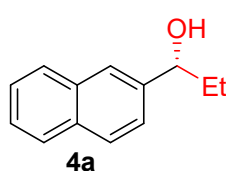

<sup>1</sup>H NMR (400 MHz, CDCl<sub>3</sub>): δ 7.75 (dt, *J* = 12.3, 6.7 Hz, 3H), 7.65 (s, 1H), 7.45 – 7.35 (m, 3H), 4.60 (t, *J* = 6.5 Hz, 1H), 2.66 (s, 1H), 1.77 (ddh, *J* = 20.9, 13.9, 7.2 Hz, 2H), 0.85 (t, *J* = 7.4 Hz, 3H). <sup>13</sup>C NMR (100 MHz, CDCl<sub>3</sub>): δ 141.83, 133.10, 132.80, 128.01, 127.80, 127.54, 125.92, 125.58, 124.60, 124.06,

75.84, 31.57, 10.03. **HRMS (ESI)** *m/z* Calcd for [C<sub>13</sub>H<sub>14</sub>NaO, M + Na]<sup>+</sup>: 209.0937, Found: 209.0934. **HPLC analysis:** Chiralcel OD-H (Hexane/*i*-PrOH = 90:10, flow rate = 1.0 mL/min, wave length = 254 nm), *t<sub>R</sub>* = 10.618 min (minor), *t<sub>R</sub>* = 11.242 min (major). **Optical Rotation:** [α]<sub>D</sub><sup>20</sup> = 14.5° (*c* = 1.0, CH<sub>3</sub>OH); **Physical properties:** white solid; **Yield:** 60 %, 22.3 mg.

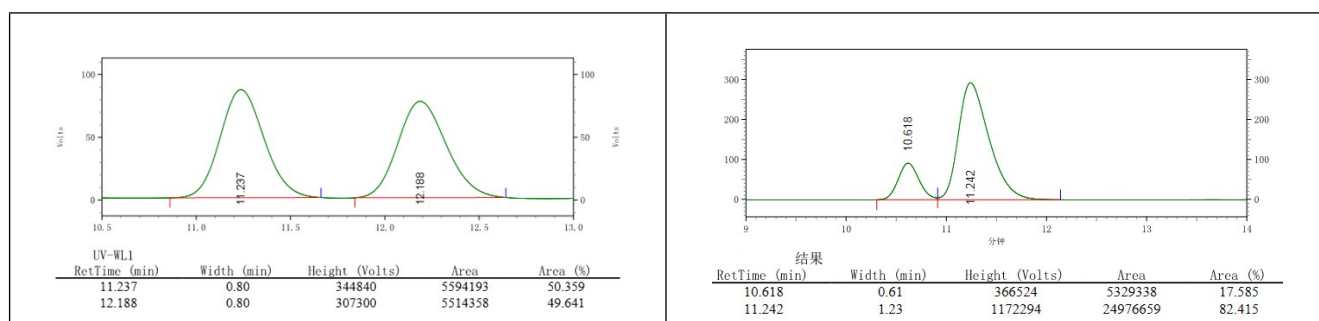

## b) **2p** as a new catalyst for asymmetric Petasis reaction.

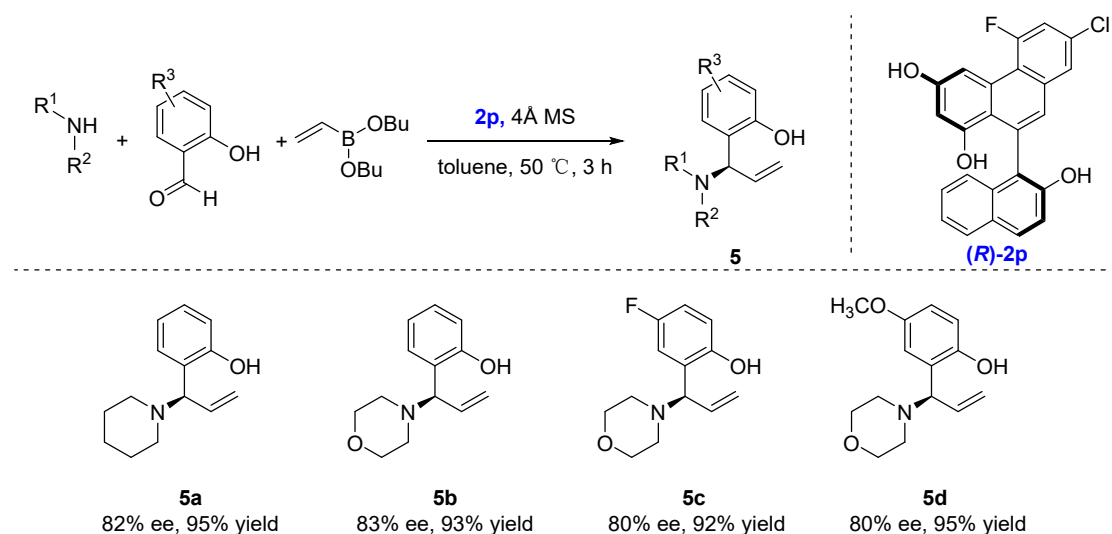

### Representative Procedure for Catalytic Asymmetric Petasis Reactions:<sup>3</sup>

**Preparation of 2-(1-(Piperidin-1-yl)allyl)phenol (5):** To a magnetically stirred mixture of 2-hydroxybenzaldehyde (1.2 equiv, 0.1 mmol), **2p** (8.0 mg, 0.02 mmol, 0.02 equiv), 4Å molecular sieves (80 mg), and dibutyl vinylboronate (0.12 mmol, 1.2 equiv) in toluene (1 mL) was added piperidine (0.12 mmol, 1.2 equiv). The mixture was stirred at 50 °C for 3 h and then filtered through a celite bed. The combined filtrates were washed with dilute brine (three times), dried over anhydrous Na<sub>2</sub>SO<sub>4</sub>, filtered, and concentrated on a rotary evaporator. The residue was isolated by flash chromatography, and the fractions containing product **5** were combined and concentrated on a rotary evaporator to give **5** as colorless oil.

## 2-(1-(piperidin-1-yl)allyl)phenol (5a)

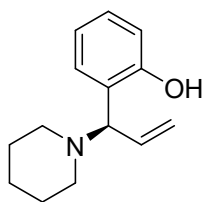

$^1\text{H NMR}$  (600 MHz,  $\text{CDCl}_3$ ):  $\delta$  11.87 (br, 1H), 7.13 (t,  $J = 7.6$  Hz, 1H), 6.94 (d,  $J = 7.4$  Hz, 1H), 6.83 – 6.72 (m, 2H), 6.00 (dt,  $J = 16.9, 9.9$  Hz, 1H), 5.28 – 5.19 (m, 2H), 3.95 (d,  $J = 9.6$  Hz, 1H), 2.53 (s, 4H), 1.68 – 1.58 (m, 4H), 1.47 (s, 2H).  $^{13}\text{C NMR}$  (150 MHz,  $\text{CDCl}_3$ ):  $\delta$  157.29, 134.84, 128.49, 128.11, 124.65, 118.98, 118.62, 116.34, 74.04, 26.00, 24.16. **HRMS (ESI)**  $m/z$  Calcd for  $[\text{C}_{14}\text{H}_{19}\text{NNaO}, \text{M} + \text{Na}]^+$ : 240.1359, Found: 240.1356. **HPLC analysis**: Chiralcel OD-H (Hexane/*i*-PrOH) = 98:2, flow rate = 1.0 mL/min, wave length = 280 nm,  $t_R = 4.037$  min (minor),  $t_R = 4.317$  min (major). **Optical Rotation**:  $[\alpha]_D^{20} = -32.9$  ( $c = 1.0, \text{CH}_3\text{OH}$ ); **Physical properties**: colorless oil; **Yield**: 95 %, 21 mg.

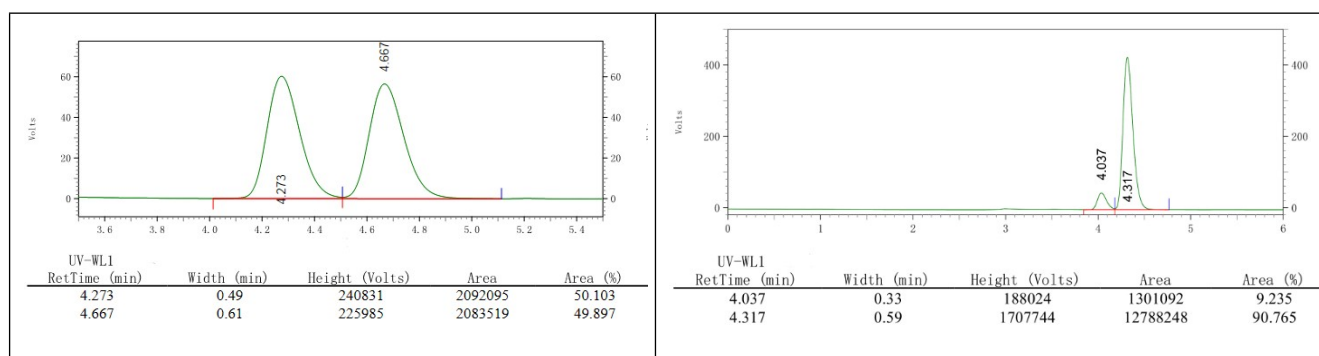

## 2-(1-morpholinoallyl)phenol (5b)

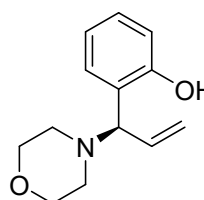

$^1\text{H NMR}$  (600 MHz,  $\text{CDCl}_3$ ):  $\delta$  10.99 (br, 1H), 7.15 (t,  $J = 7.7$  Hz, 1H), 6.96 (d,  $J = 7.4$  Hz, 1H), 6.84 – 6.76 (m, 2H), 5.98 (dt,  $J = 17.0, 9.8$  Hz, 1H), 5.29 (d,  $J = 16.9$  Hz, 1H), 5.24 (d,  $J = 10.0$  Hz, 1H), 3.88 (d,  $J = 9.5$  Hz, 1H), 3.73 (s, 4H), 2.57 (d,  $J = 66.2$  Hz, 4H).  $^{13}\text{C NMR}$  (150 MHz,  $\text{CDCl}_3$ ):  $\delta$  156.28, 134.68, 128.85, 128.45, 123.76, 119.50, 119.04, 116.45, 74.54, 66.78, 50.89. **HRMS (ESI)**  $m/z$  Calcd for  $[\text{C}_{13}\text{H}_{17}\text{NNaO}_2, \text{M} + \text{Na}]^+$ : 242.1151, Found: 242.1152. **HPLC analysis**: Chiralcel OD-H (Hexane/*i*-PrOH) = 98:2, flow rate = 1.0 mL/min, wave length = 280 nm,  $t_R = 9.407$  min (minor),  $t_R = 9.883$  min (major). **Optical Rotation**:  $[\alpha]_D^{20} = -148.6$  ( $c = 1.0, \text{CH}_3\text{OH}$ ); **Physical properties**: colorless oil; **Yield**: 93 %, 20.3 mg.

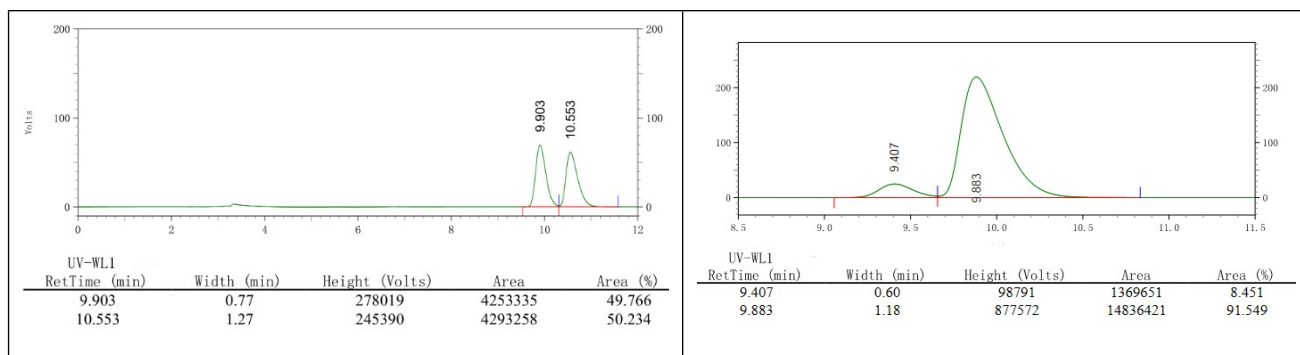

#### 4-fluoro-2-(1-morpholinoallyl)phenol (5c)

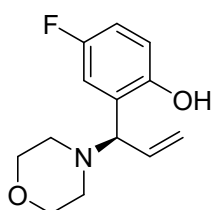

**<sup>1</sup>H NMR** (400 MHz, CDCl<sub>3</sub>): δ 10.83 (br, 1H), 6.85 (td, *J* = 8.6, 2.6 Hz, 1H), 6.72 (ddd, *J* = 15.7, 8.7, 3.5 Hz, 2H), 5.96 (dt, *J* = 19.1, 9.8 Hz, 1H), 5.35 – 5.26 (m, 2H), 3.86 (d, *J* = 9.5 Hz, 1H), 3.81 – 3.67 (m, 4H), 2.58 (d, *J* = 38.5 Hz, 4H).

**<sup>13</sup>C NMR** (100 MHz, CDCl<sub>3</sub>): δ 156.18 (d, *J* = 236.0 Hz), 152.32, 133.84, 124.63 (d, *J* = 7.0 Hz), 119.87, 117.18 (d, *J* = 8.0 Hz), 115.13 (d, *J* = 22.0 Hz), 114.81 (d, *J* = 23.0 Hz), 74.05, 74.04, 66.74, 50.74. **HRMS (ESI)** *m/z* Calcd for [C<sub>13</sub>H<sub>16</sub>FNNaO<sub>2</sub>, M + Na]<sup>+</sup>: 260.1057, Found: 260.1055. **HPLC analysis:** Chiralcel OD-H (Hexane/*i*-PrOH) = 95:5, flow rate = 1.0 mL/min, wave length = 220 nm, *t<sub>R</sub>* = 8.003 min (major), *t<sub>R</sub>* = 8.640 min (minor). **Optical Rotation:** [α]<sub>D</sub><sup>20</sup> = -97.3 (*c* = 1.0, CH<sub>3</sub>OH); **Physical properties:** colorless oil; **Yield:** 92 %, 22.0 mg.

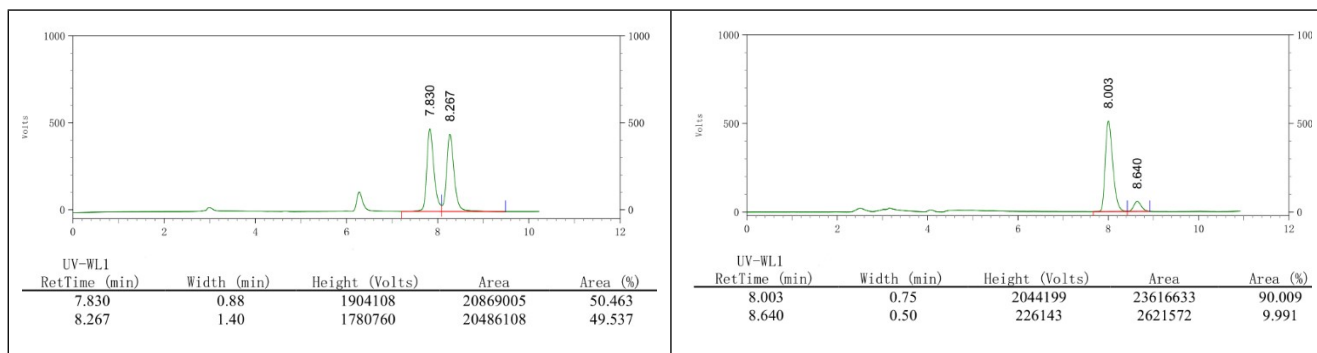

#### 4-methoxy-2-(1-morpholinoallyl)phenol (5d)

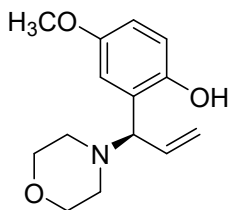

**<sup>1</sup>H NMR** (400 MHz, CDCl<sub>3</sub>): δ 10.46 (s, 1H), 6.77 – 6.69 (m, 2H), 6.55 (d, *J* = 2.1 Hz, 1H), 5.98 (dt, *J* = 17.2, 9.7 Hz, 1H), 5.34 – 5.21 (m, 2H), 3.82 (d, *J* = 9.5 Hz, 1H), 3.72 (s, 7H), 2.57 (d, *J* = 38.6 Hz, 4H). **<sup>13</sup>C NMR** (100 MHz, CDCl<sub>3</sub>): δ 152.72, 149.99, 134.57, 124.40, 119.17, 116.83, 114.25, 114.17, 113.68, 74.67,

74.58, 66.76, 55.50, 50.90. **HRMS (ESI)** *m/z* Calcd for [C<sub>14</sub>H<sub>19</sub>NNaO<sub>3</sub>, M + Na]<sup>+</sup>: 272.1257,

Found: 272.1255. **HPLC analysis:** Chiralcel OD-H (Hexane/*i*-PrOH) = 95:5, flow rate = 1.0 mL/min, wave length = 220 nm,  $t_R = 11.550$  min (major),  $t_R = 14.980$  min (minor). **Optical Rotation:**  $[\alpha]_D^{20} = -109.0$  ( $c = 1.0$ , CH<sub>3</sub>OH); **Physical properties:** colorless oil; **Yield:** 95 %, 24.0 mg.

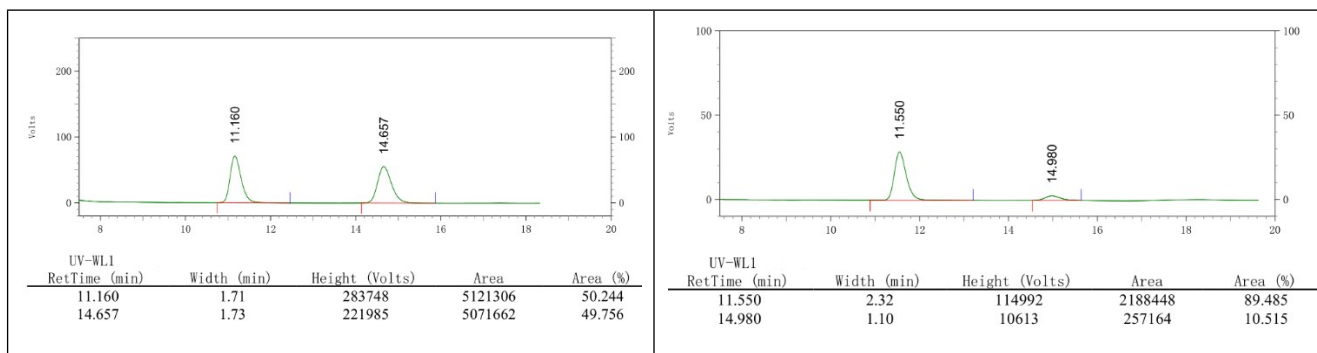



# XI. <sup>1</sup>H and <sup>13</sup>C NMR spectra of substrates

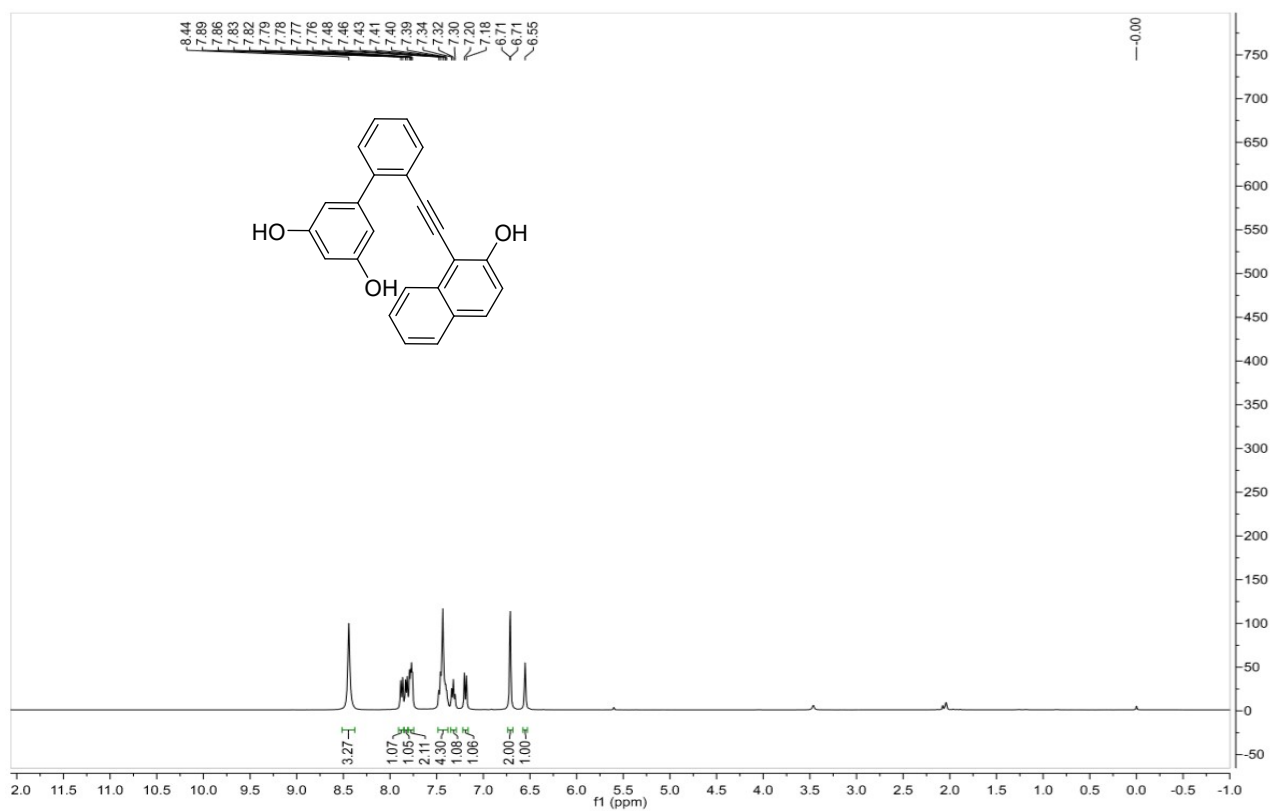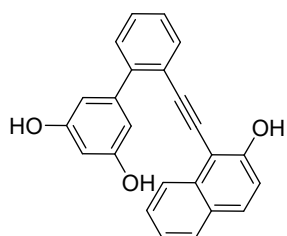



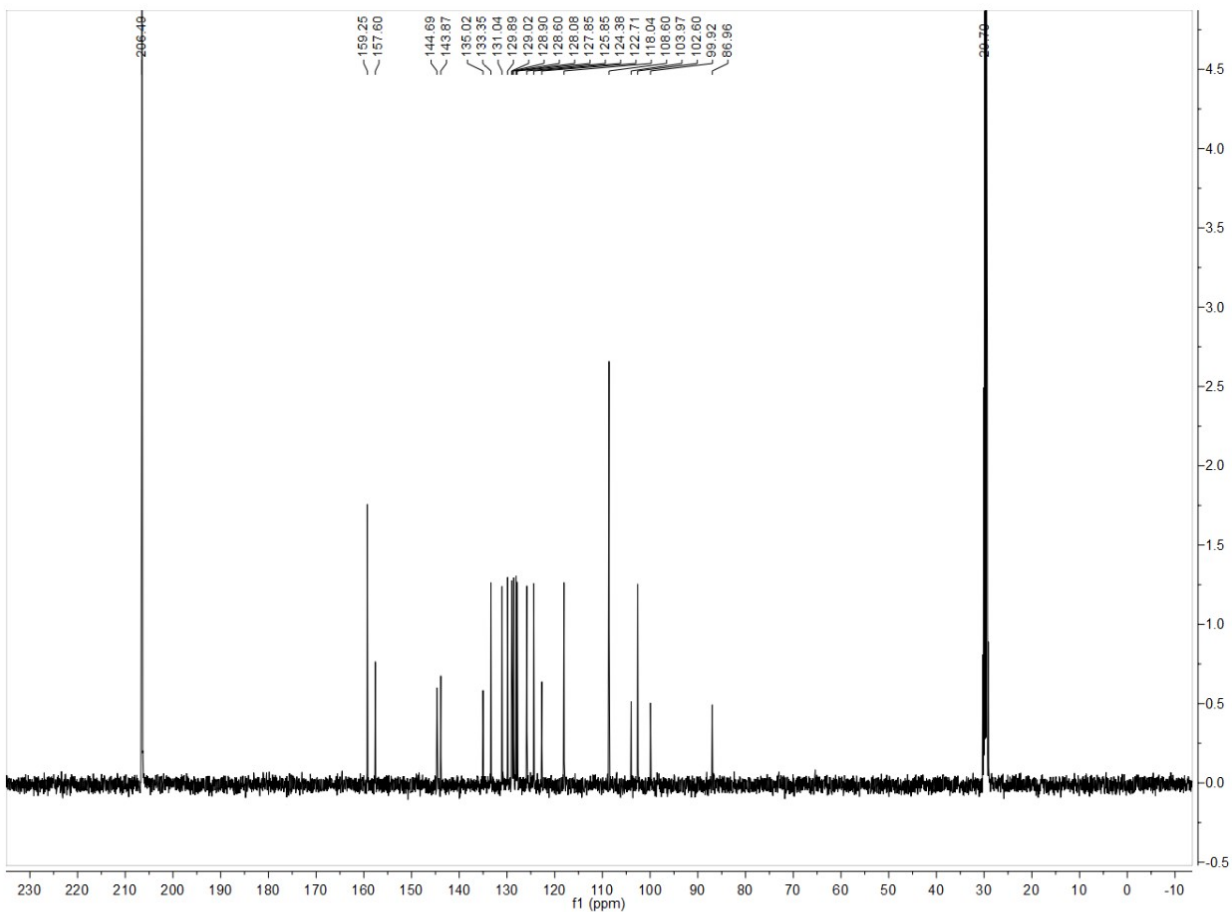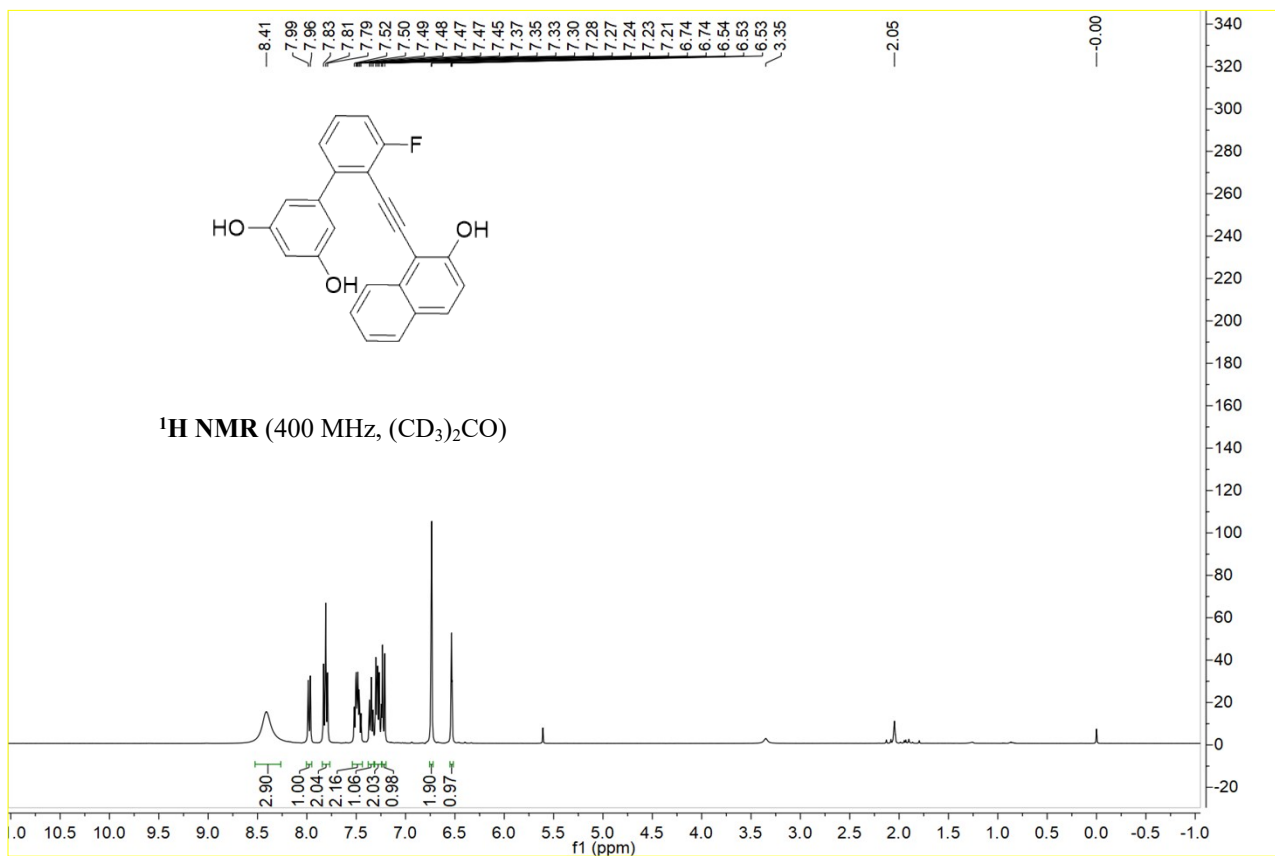

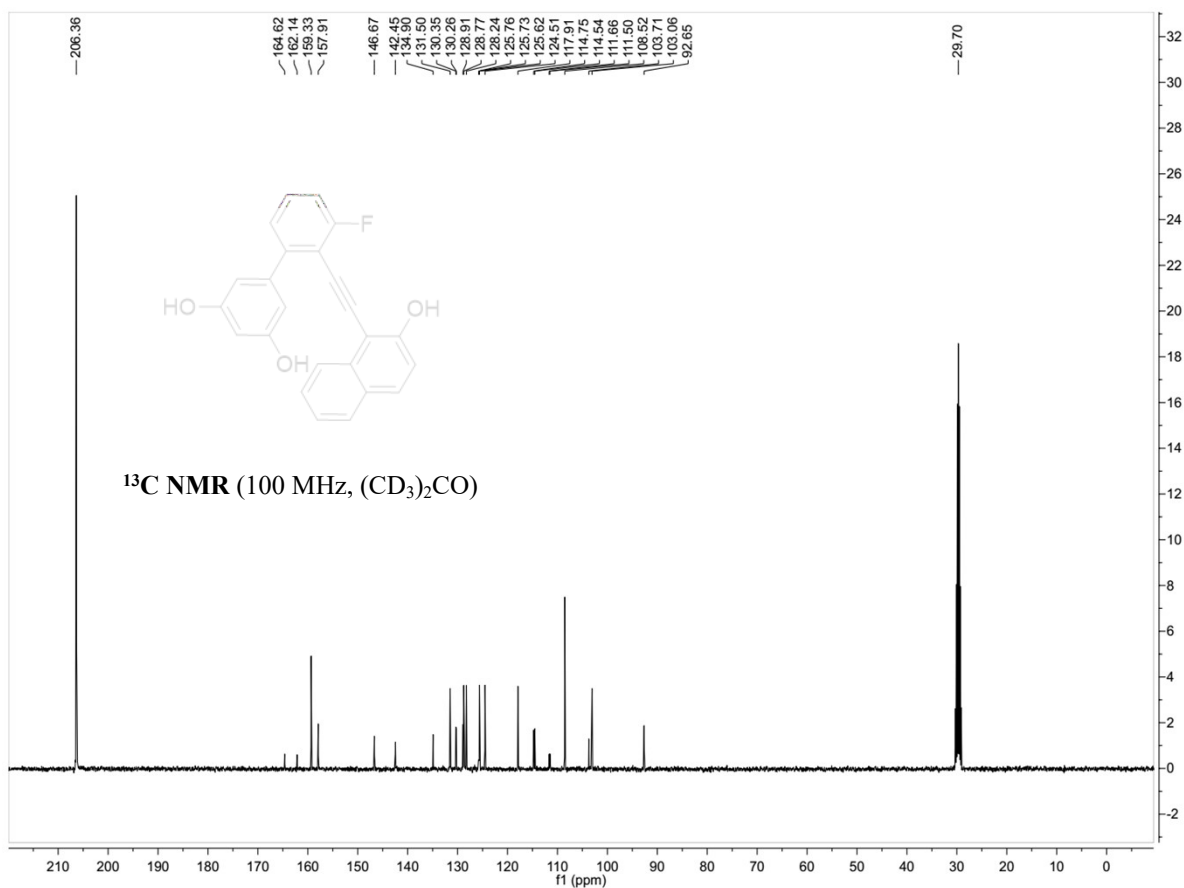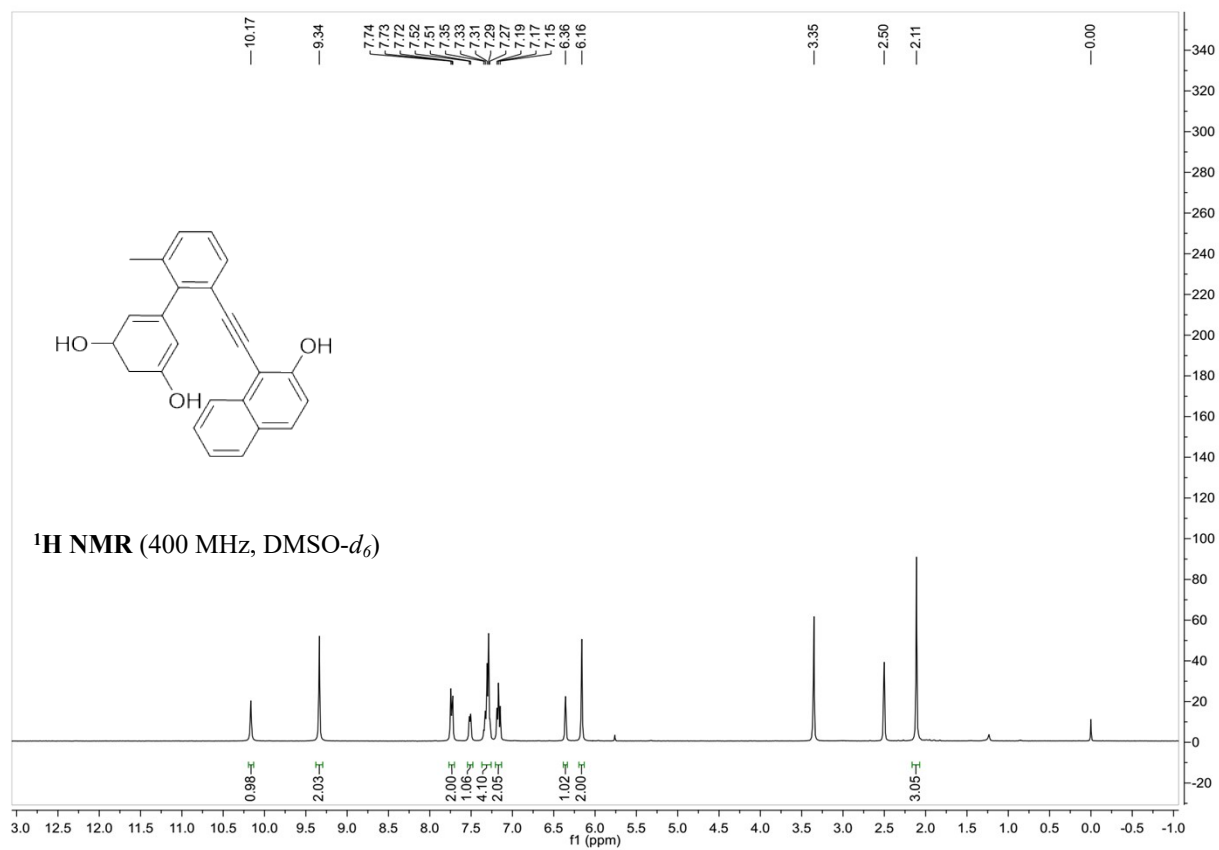

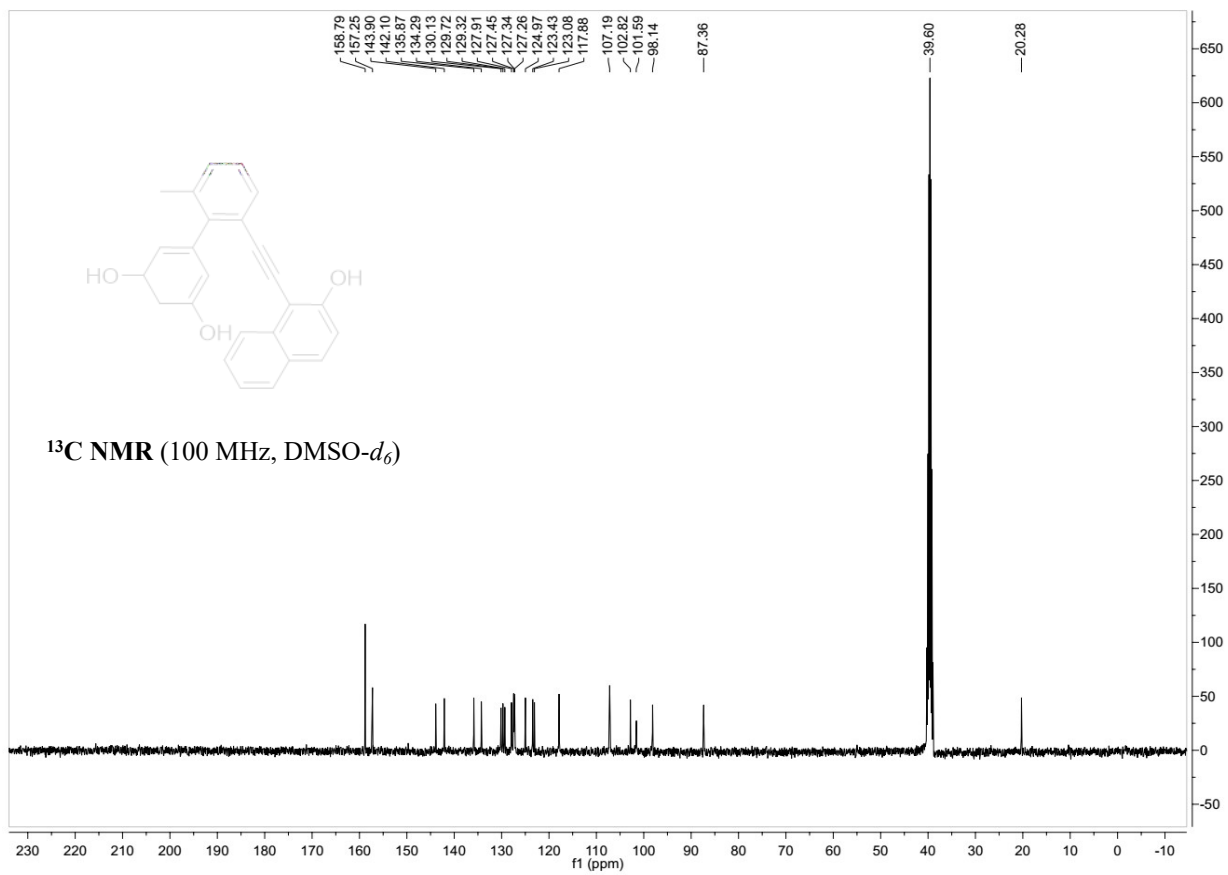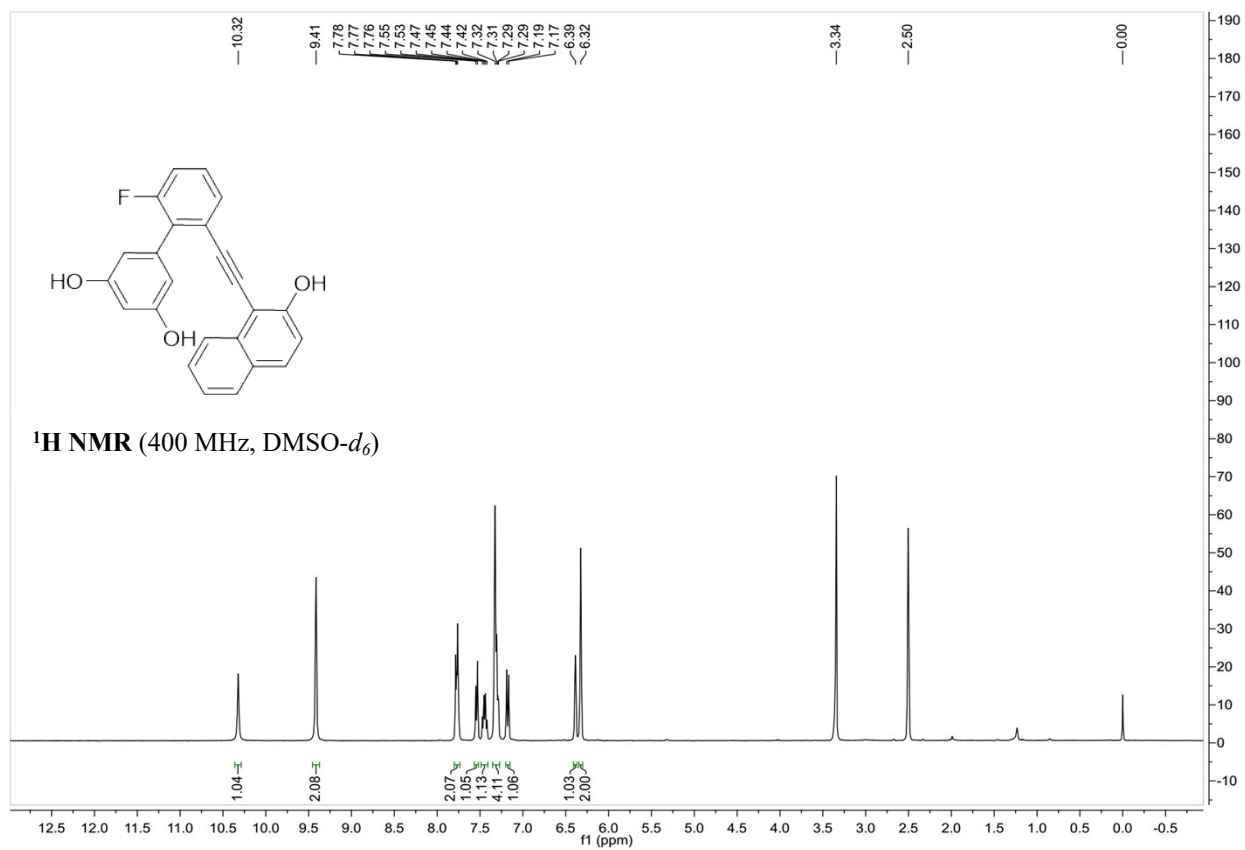

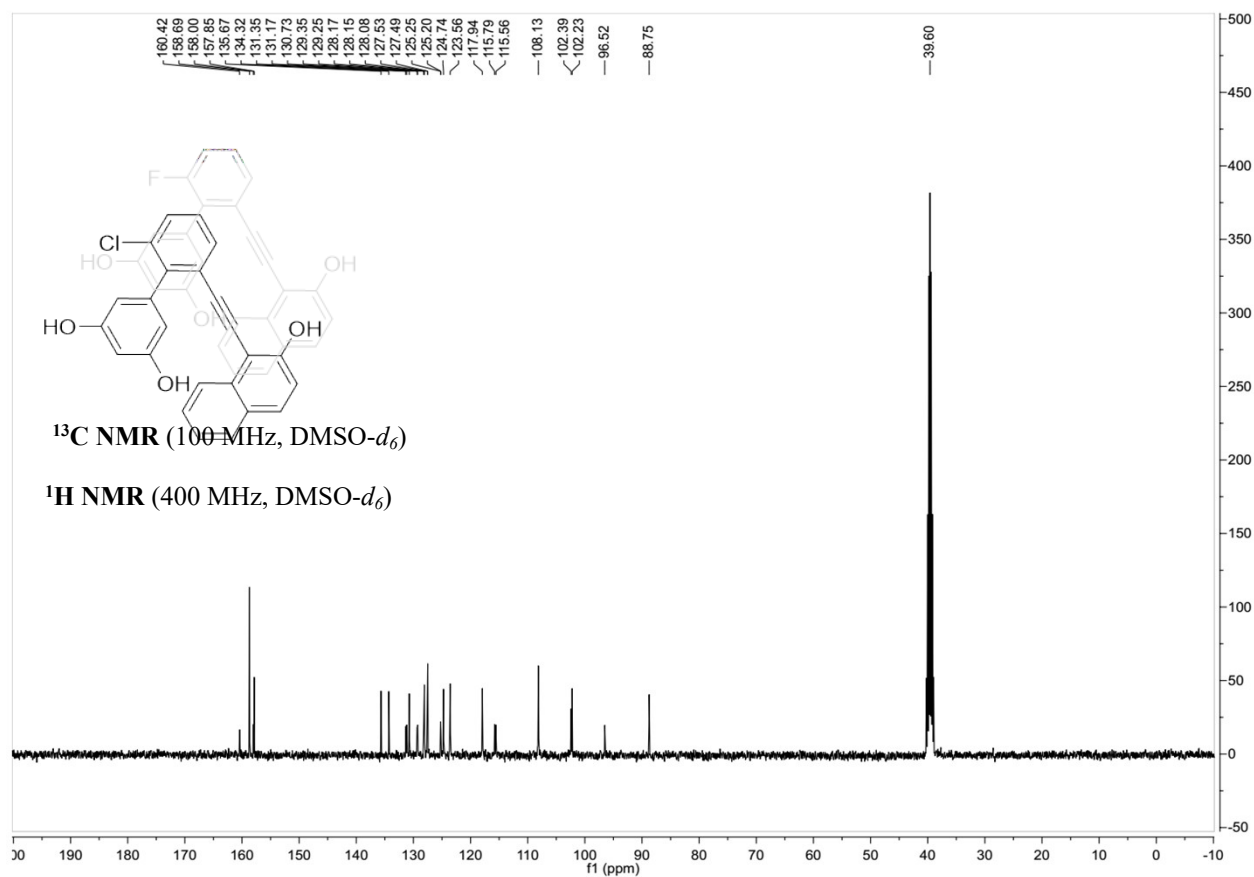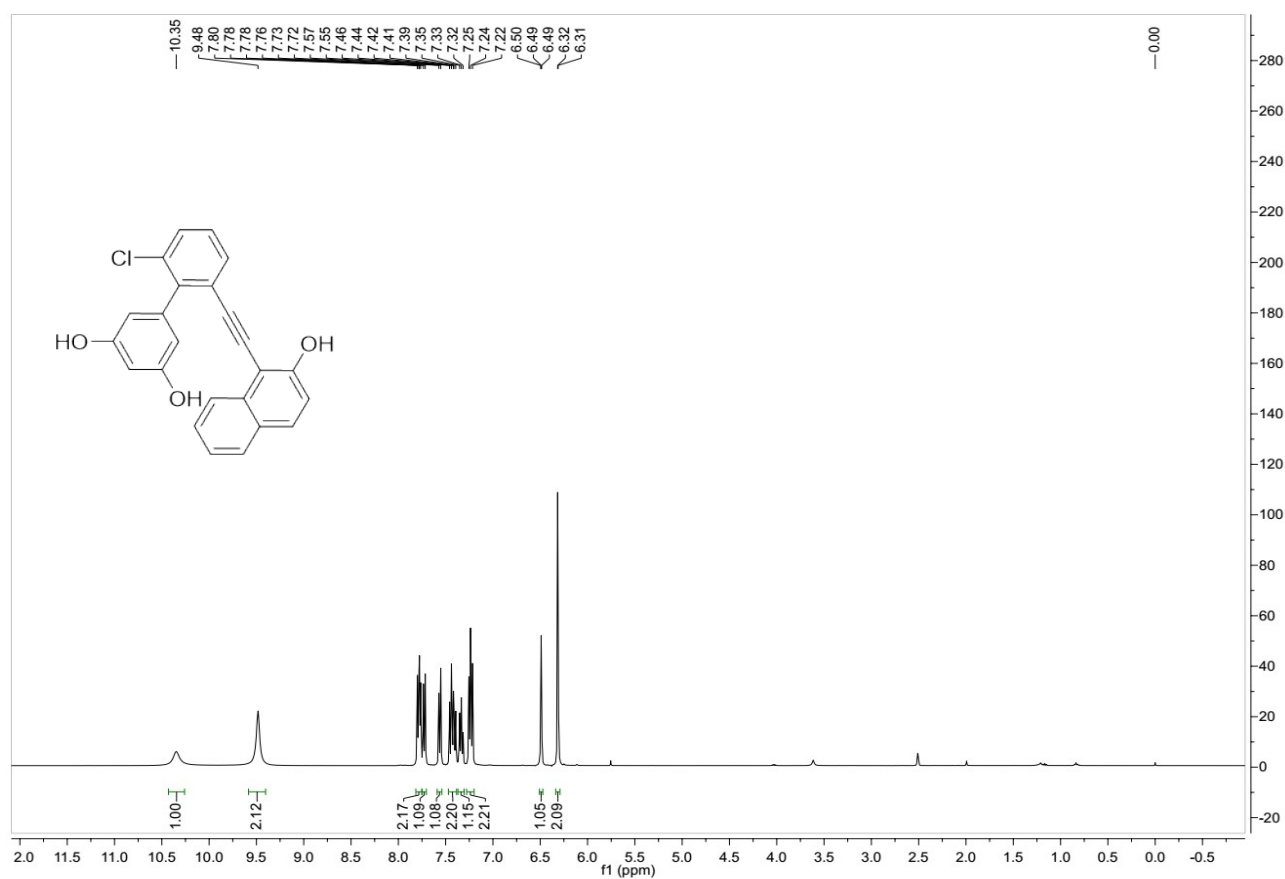

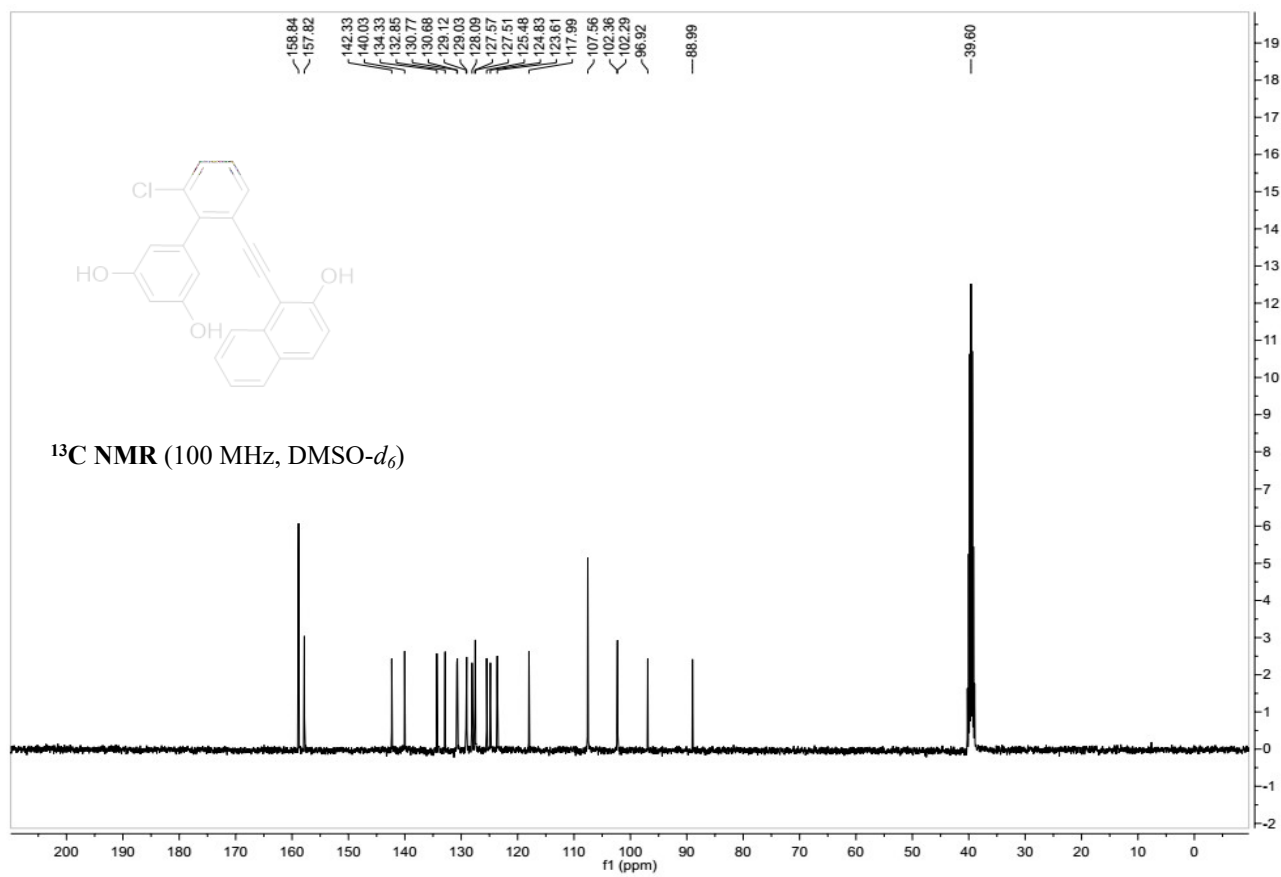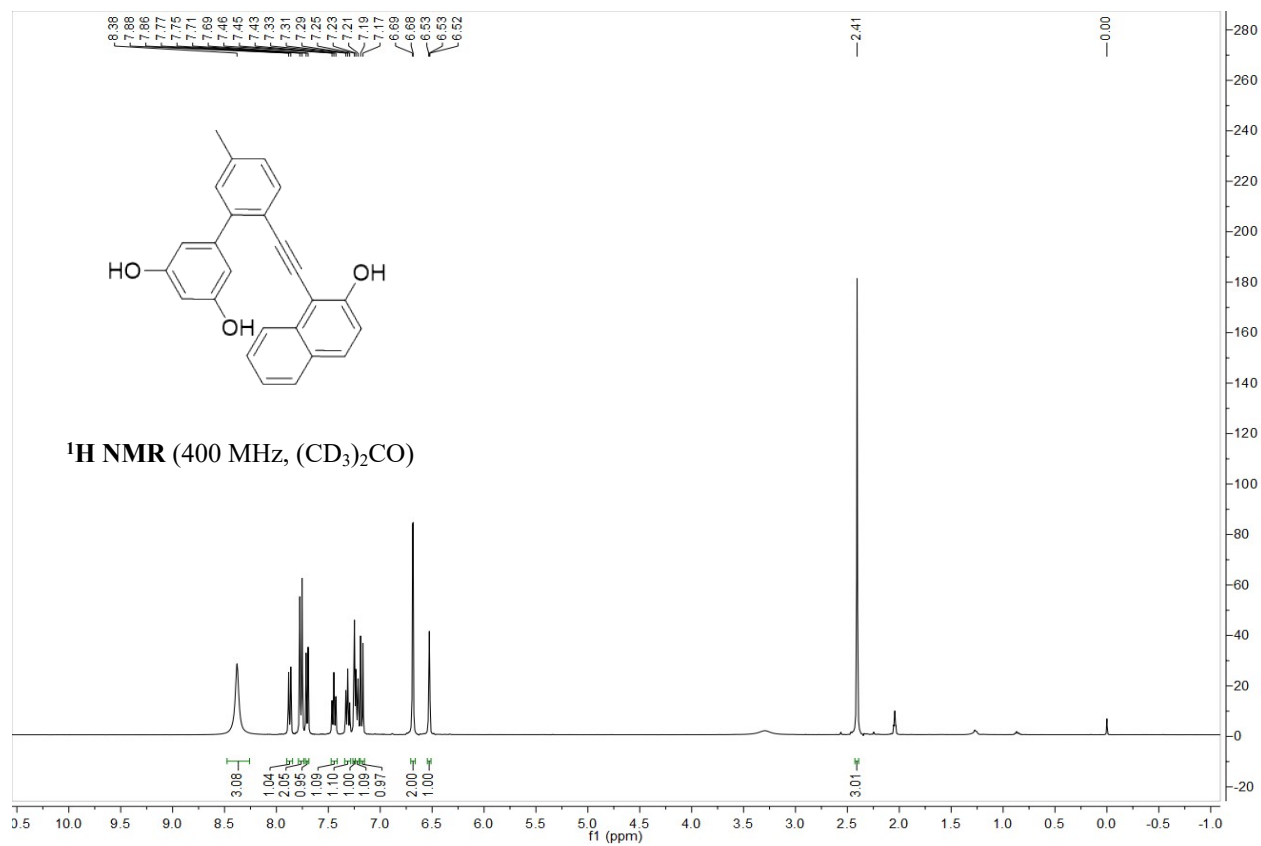

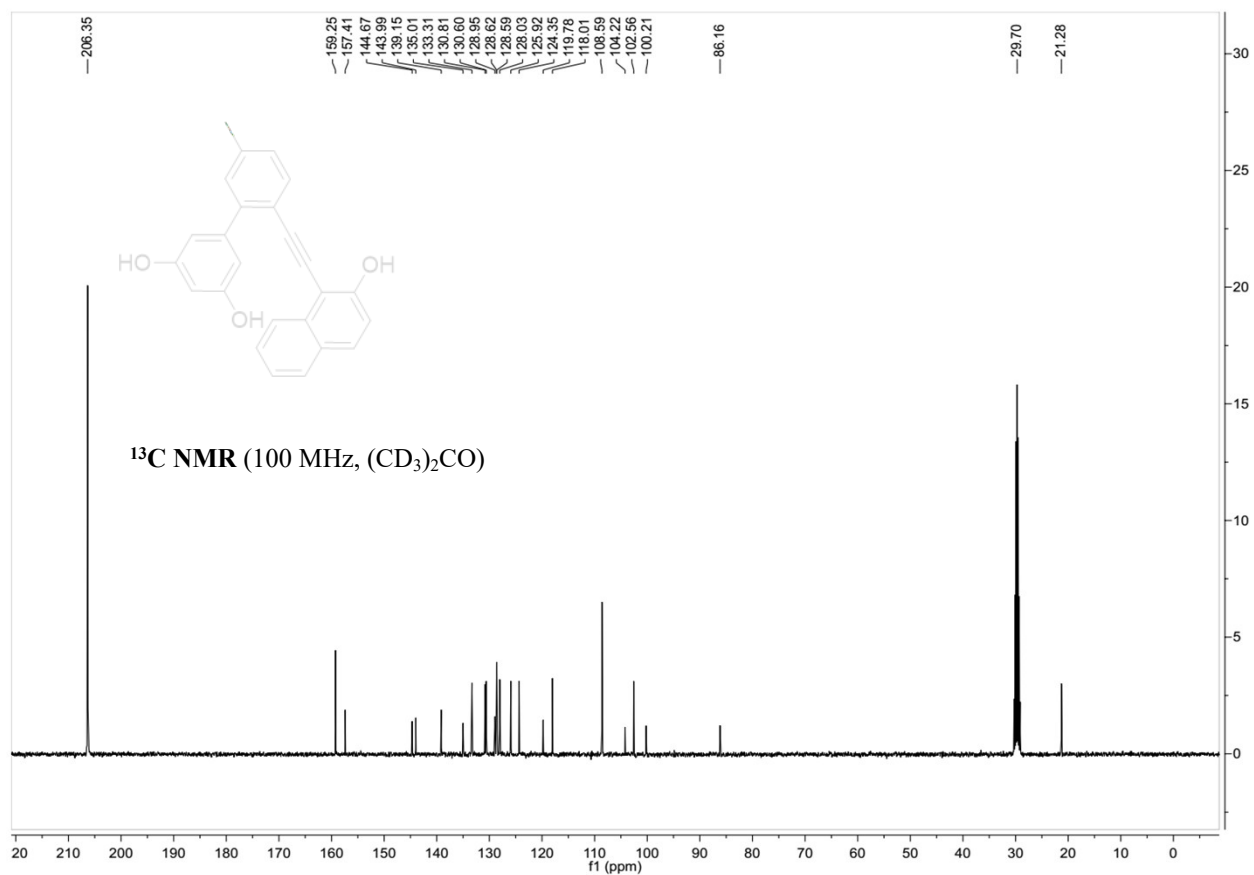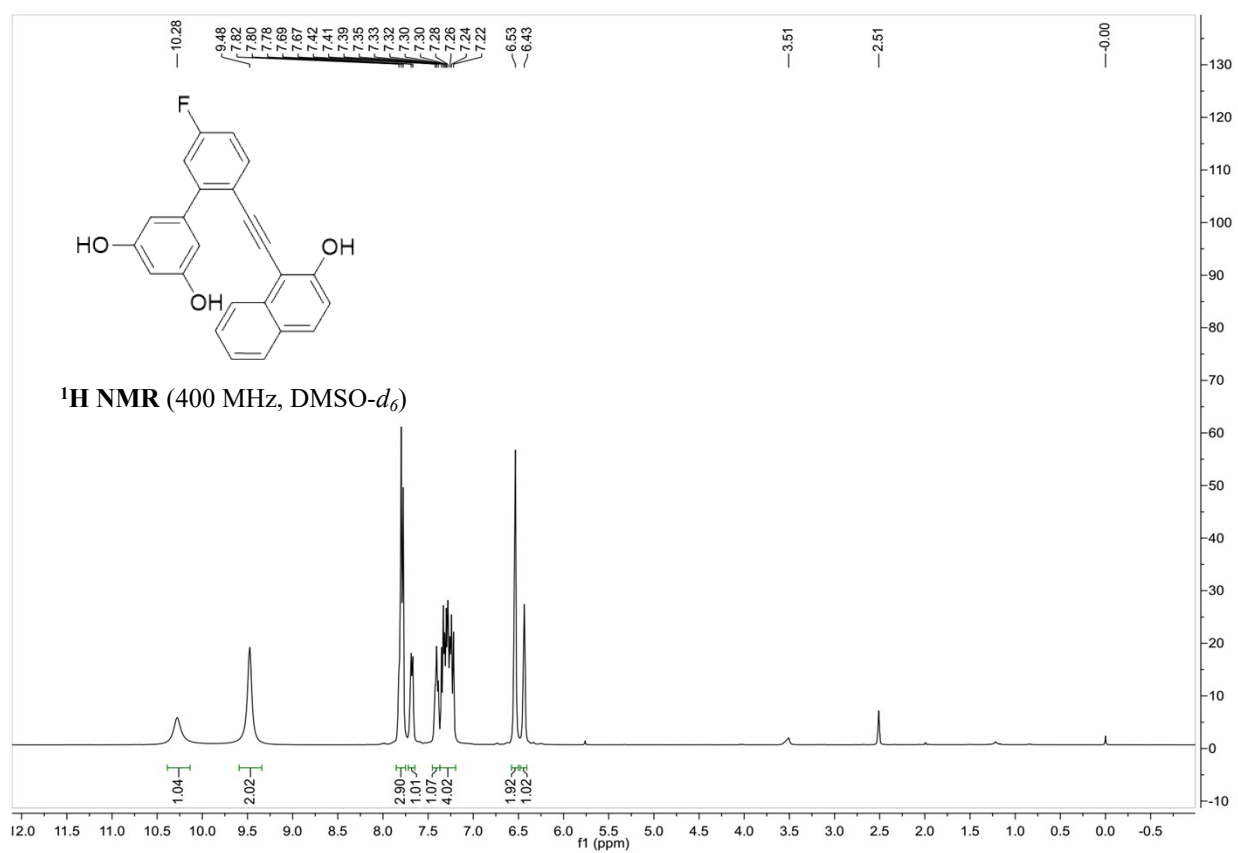

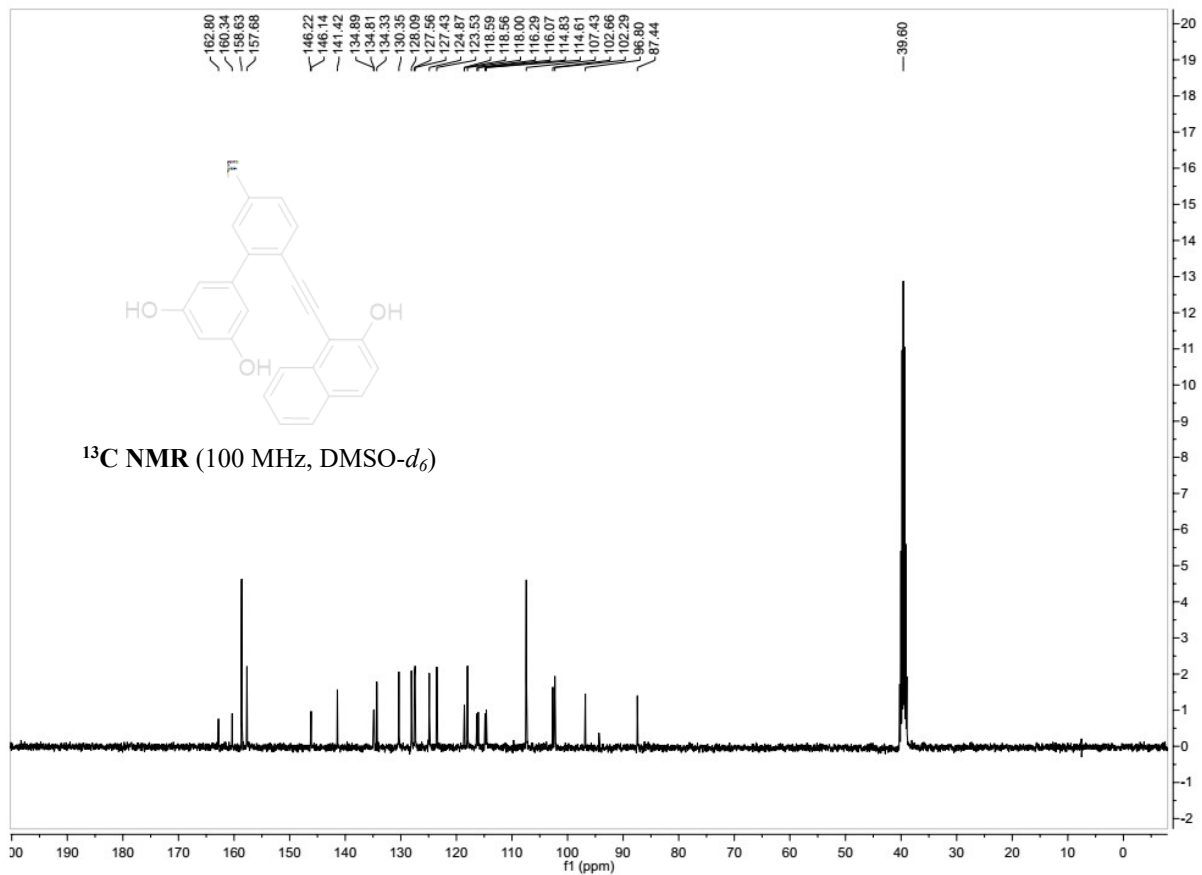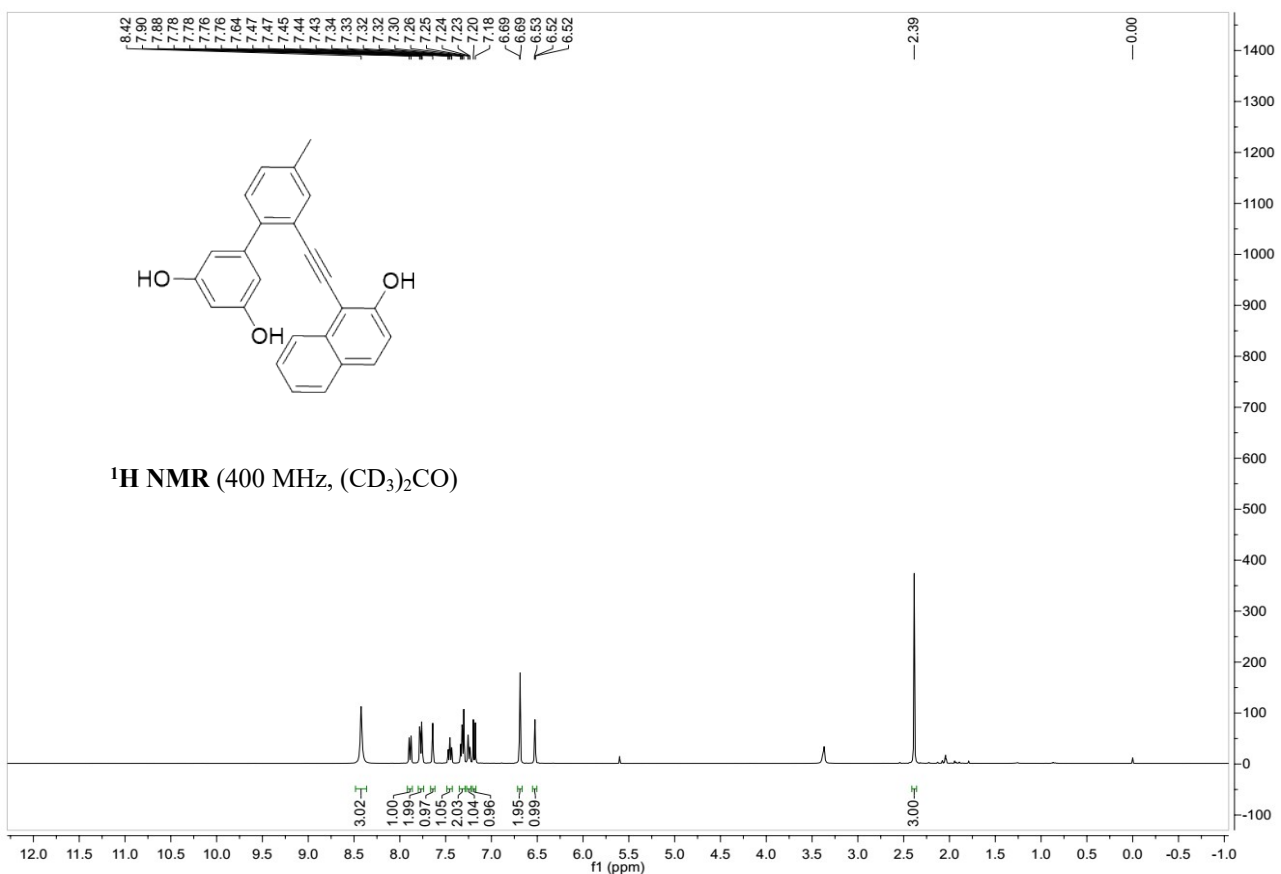

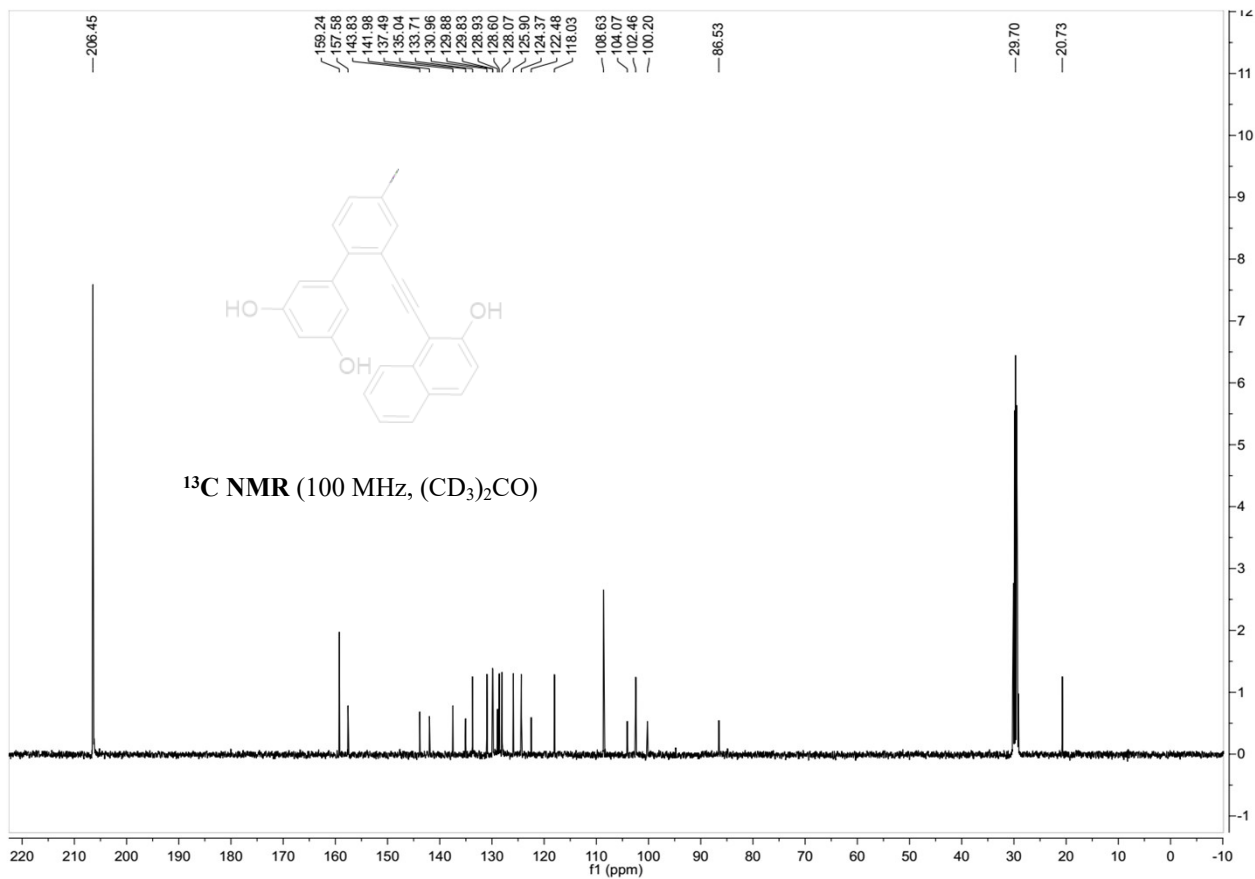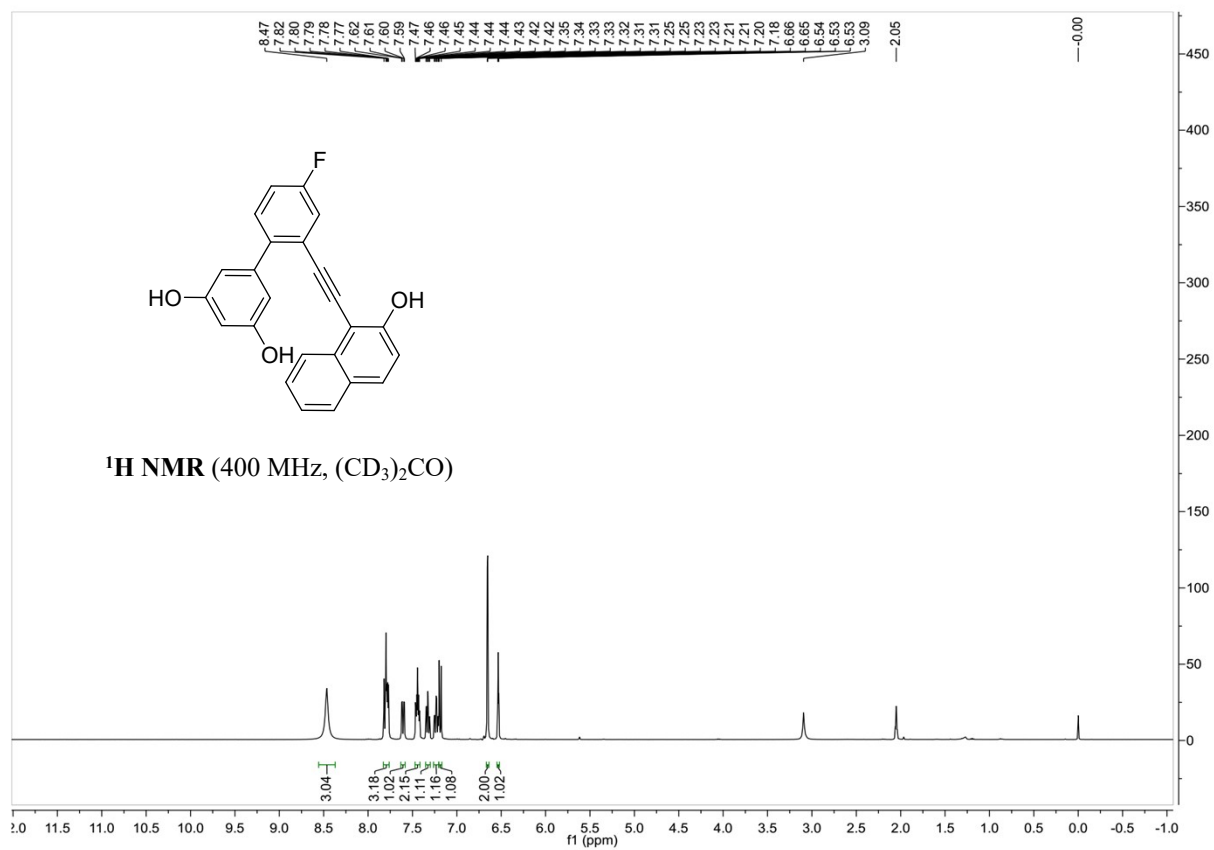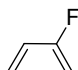



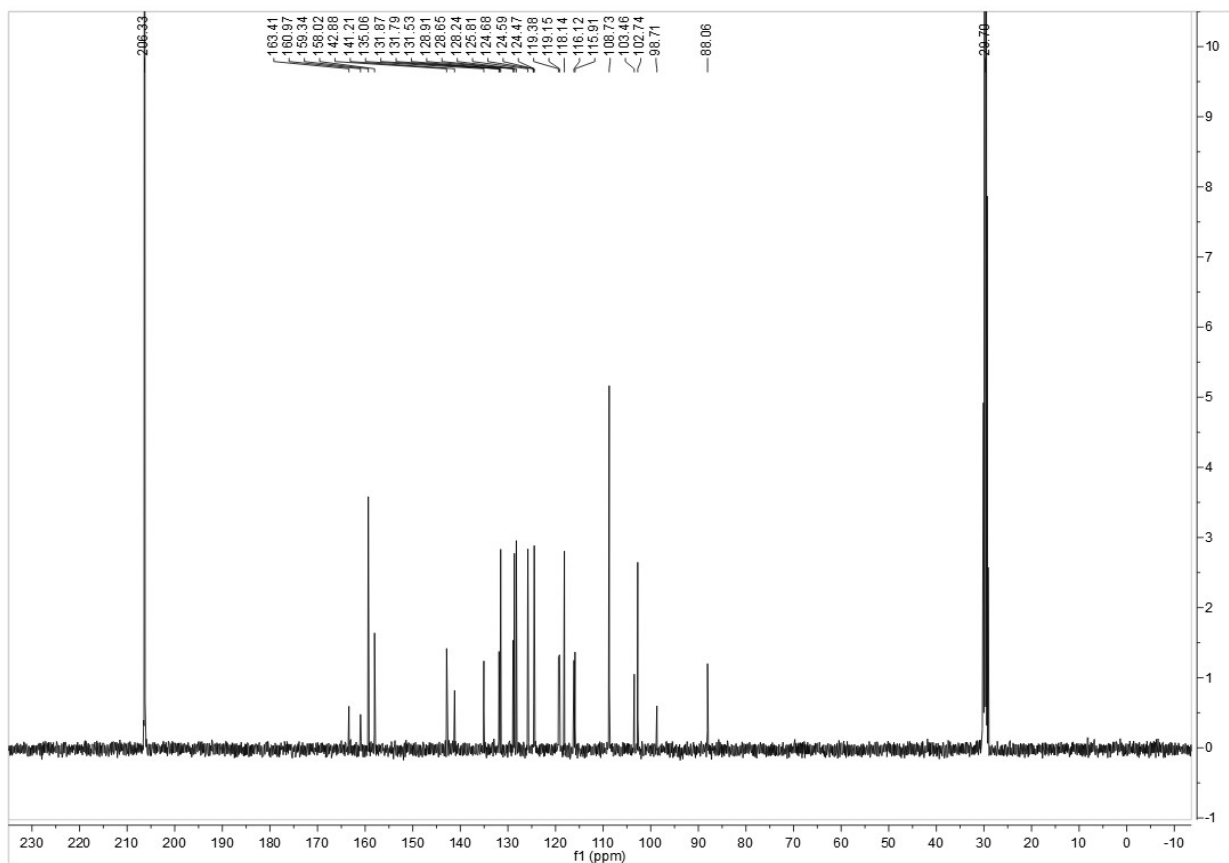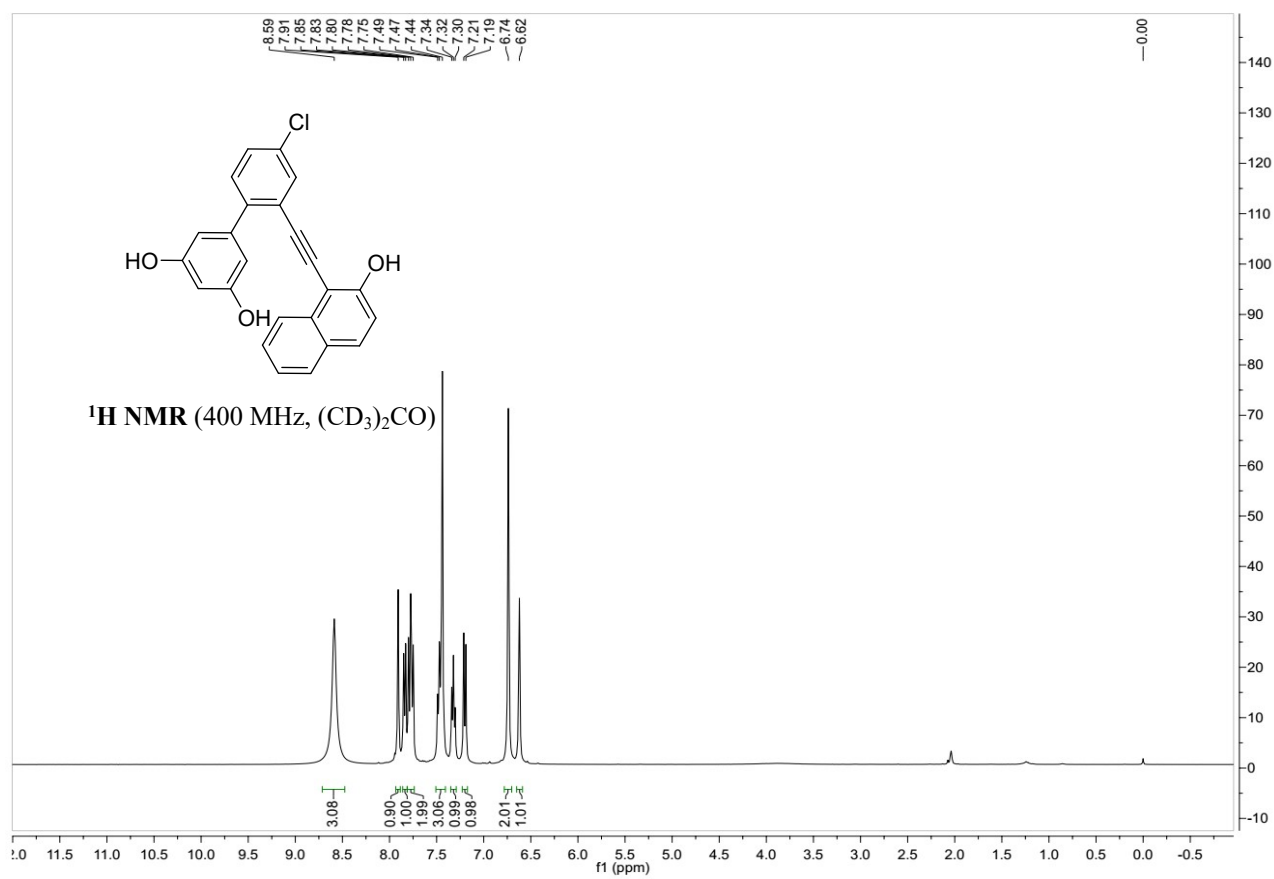



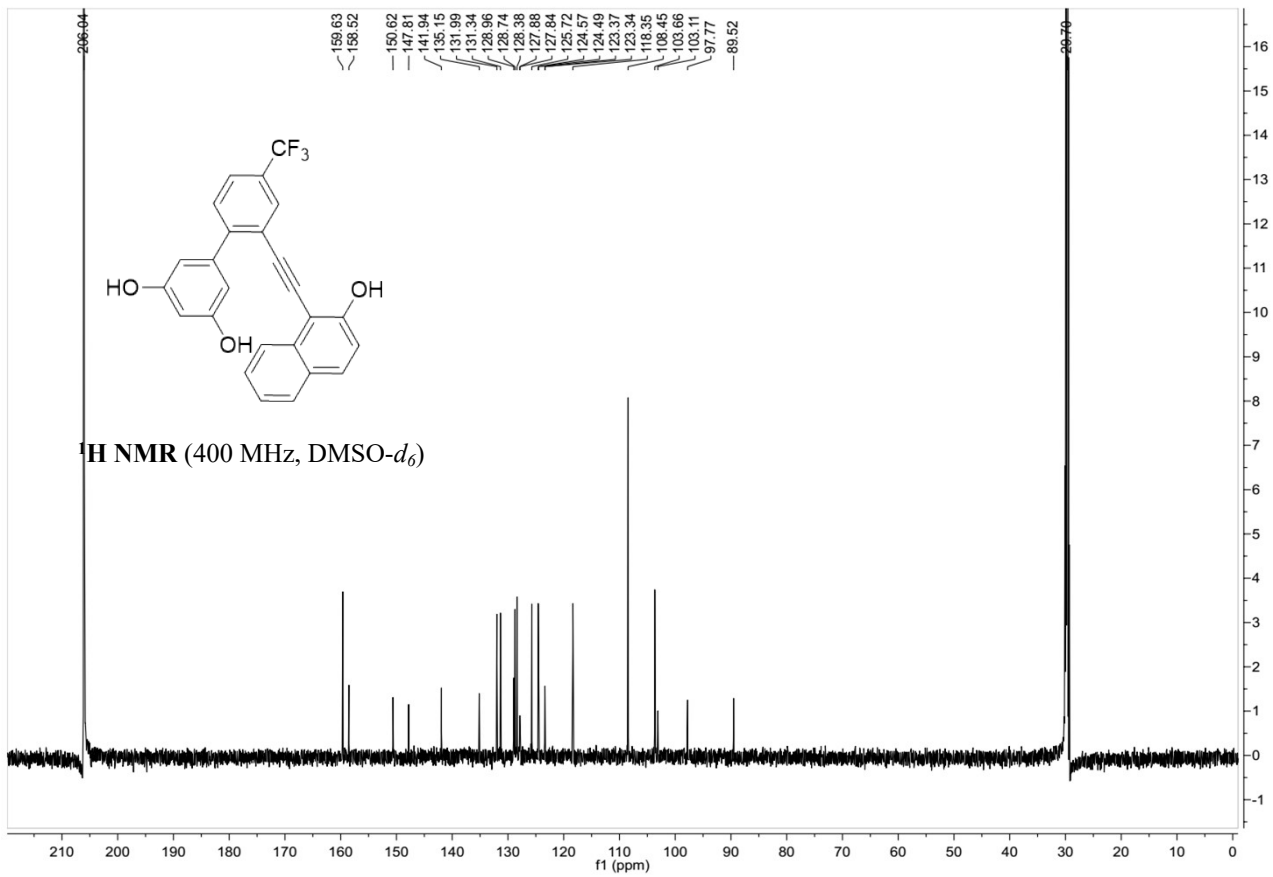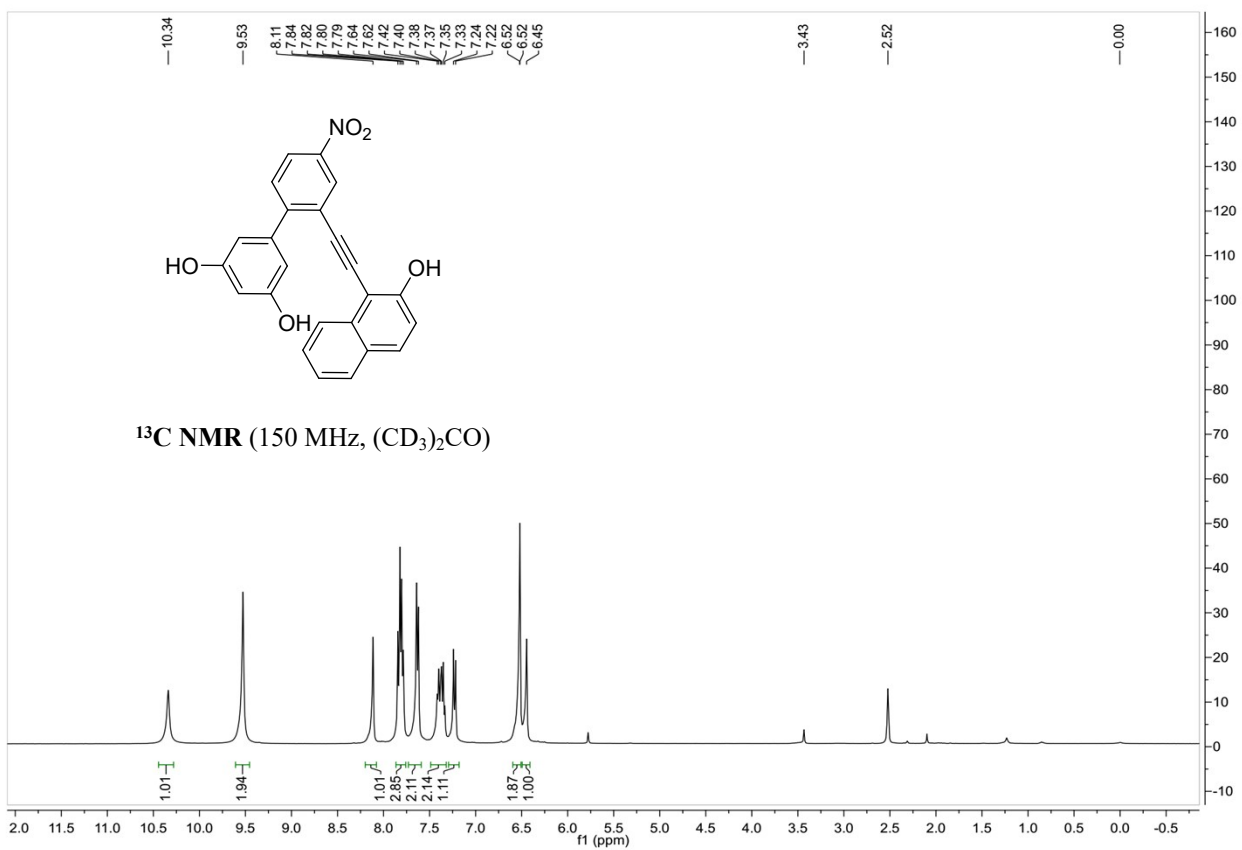

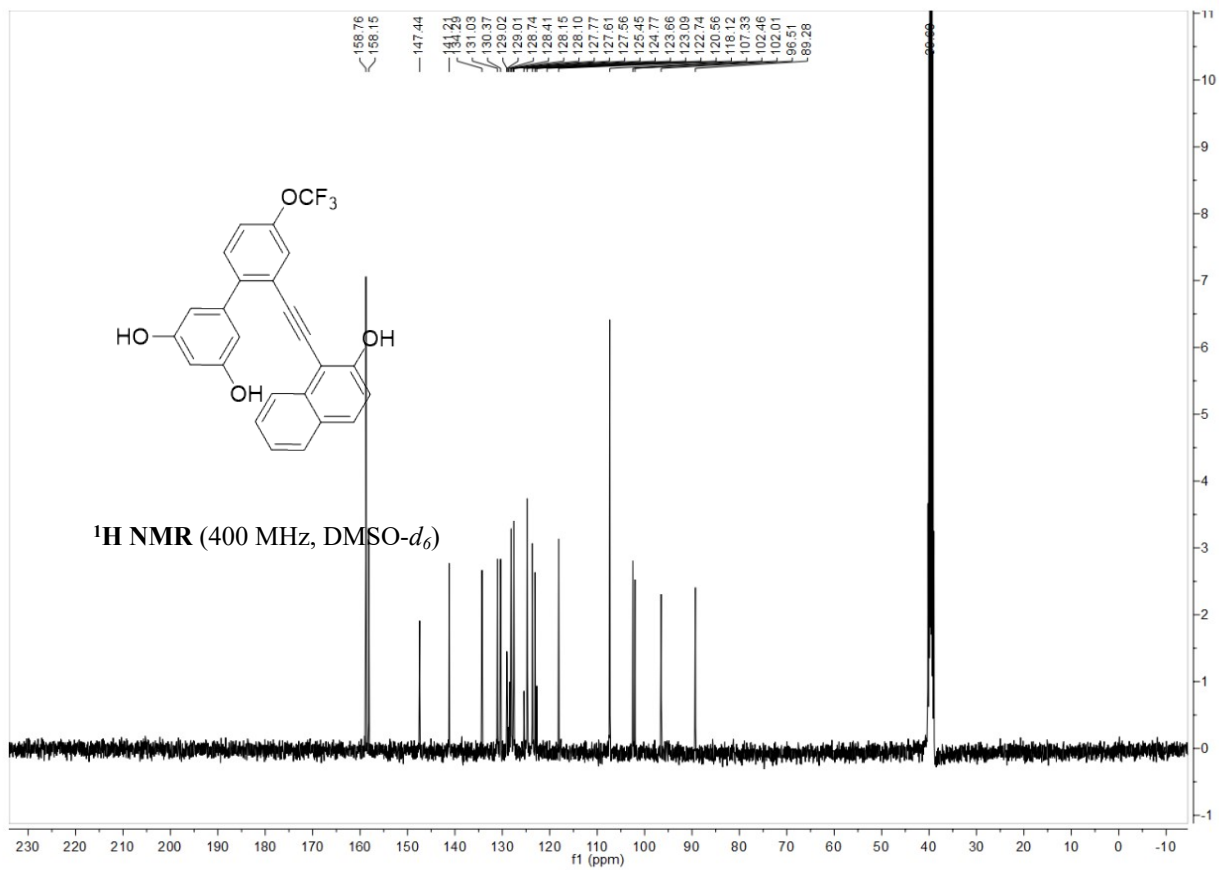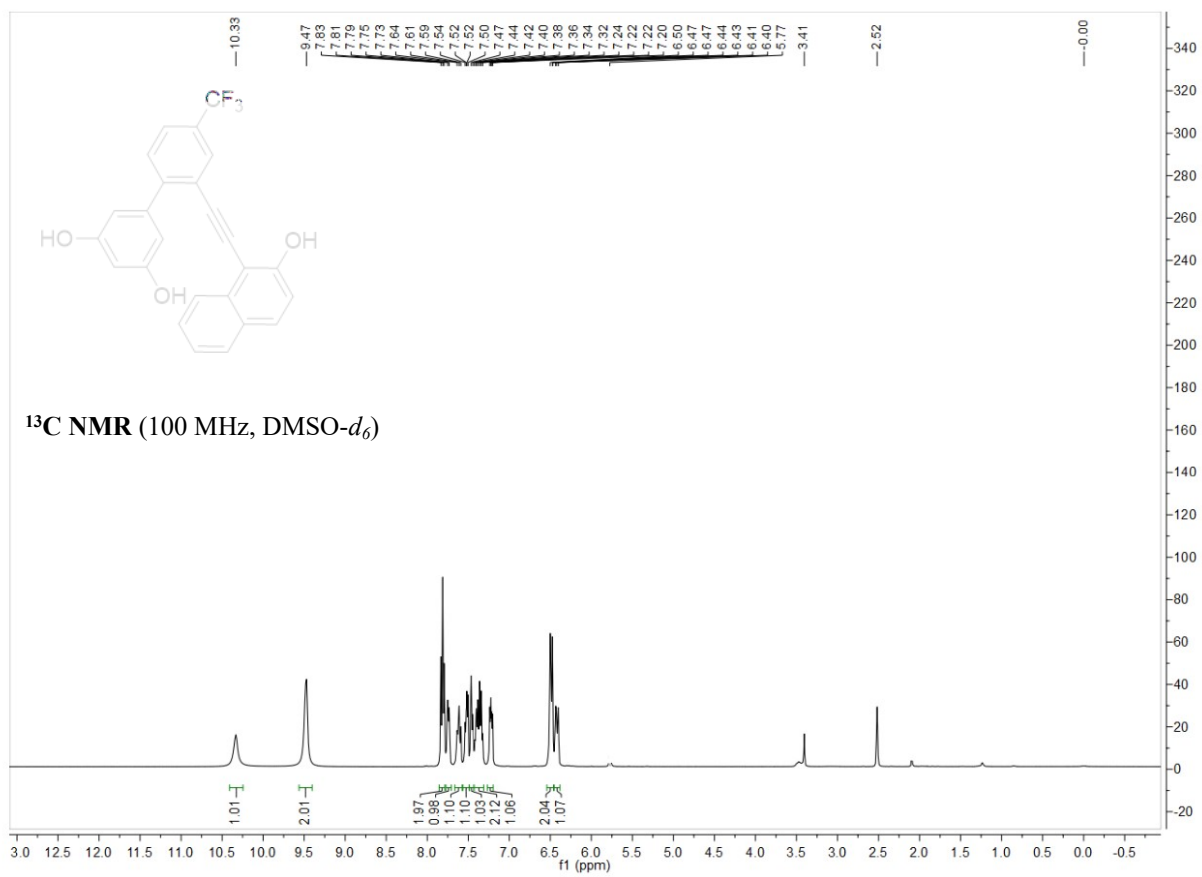

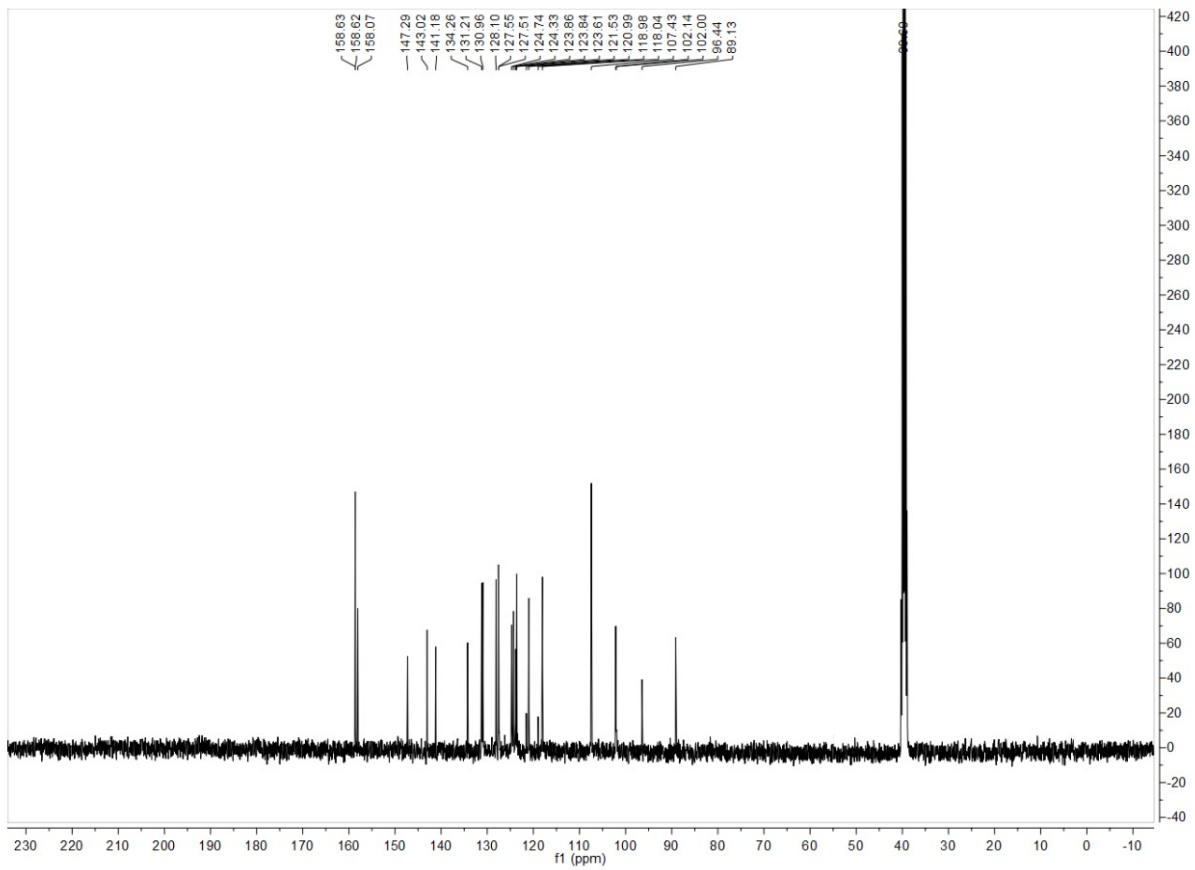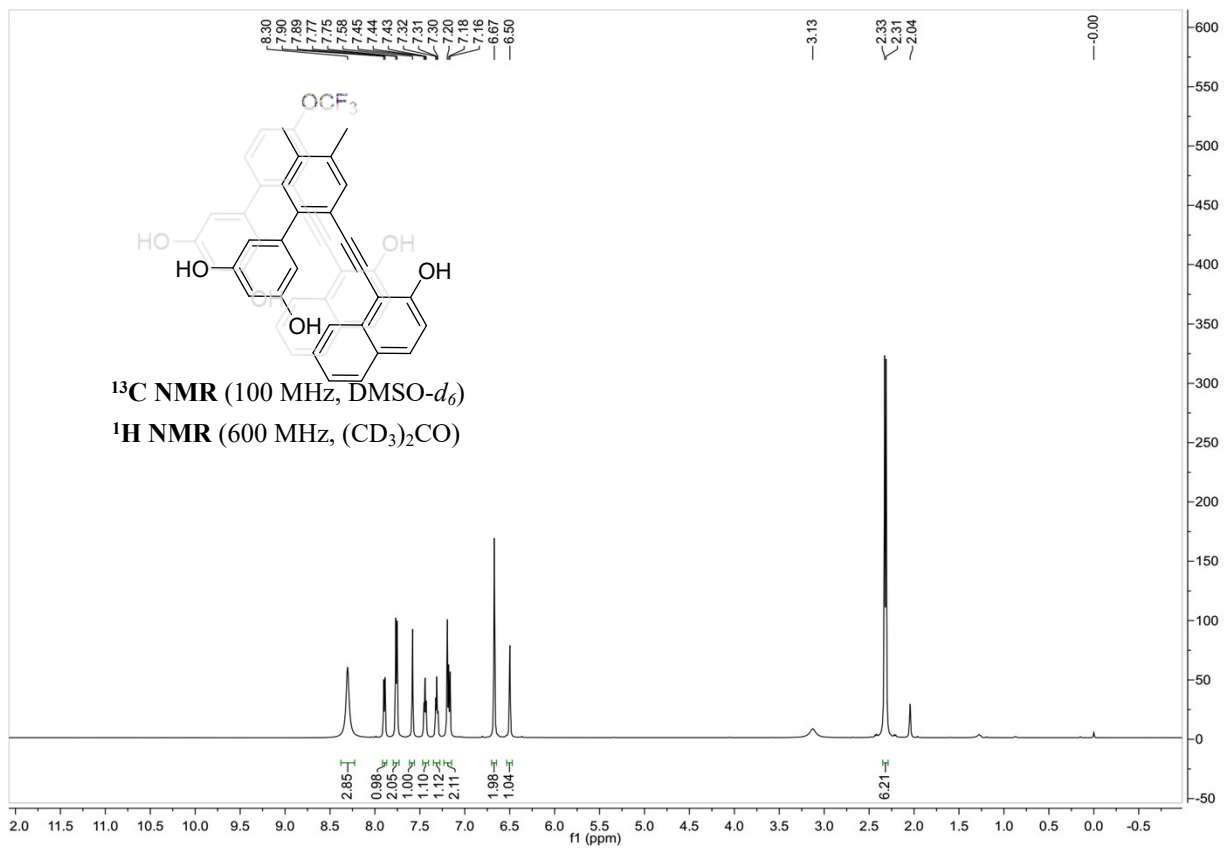

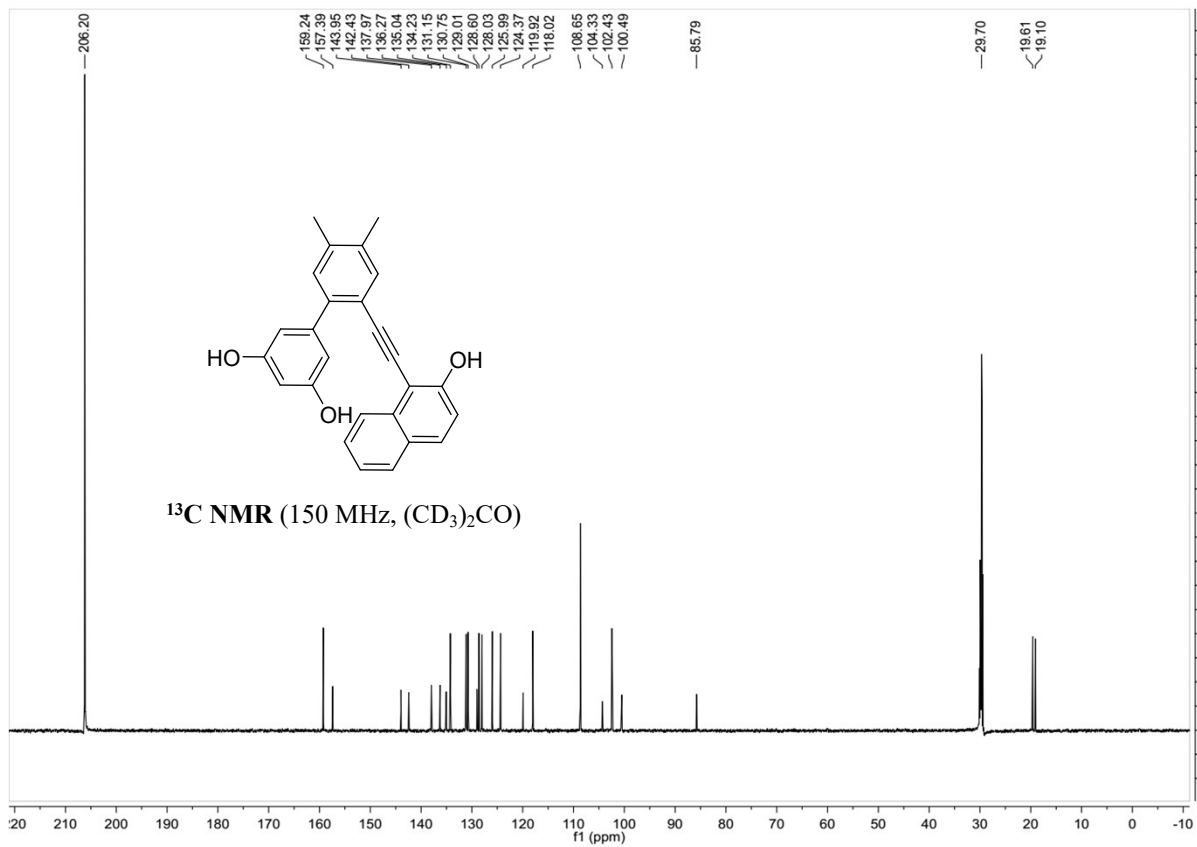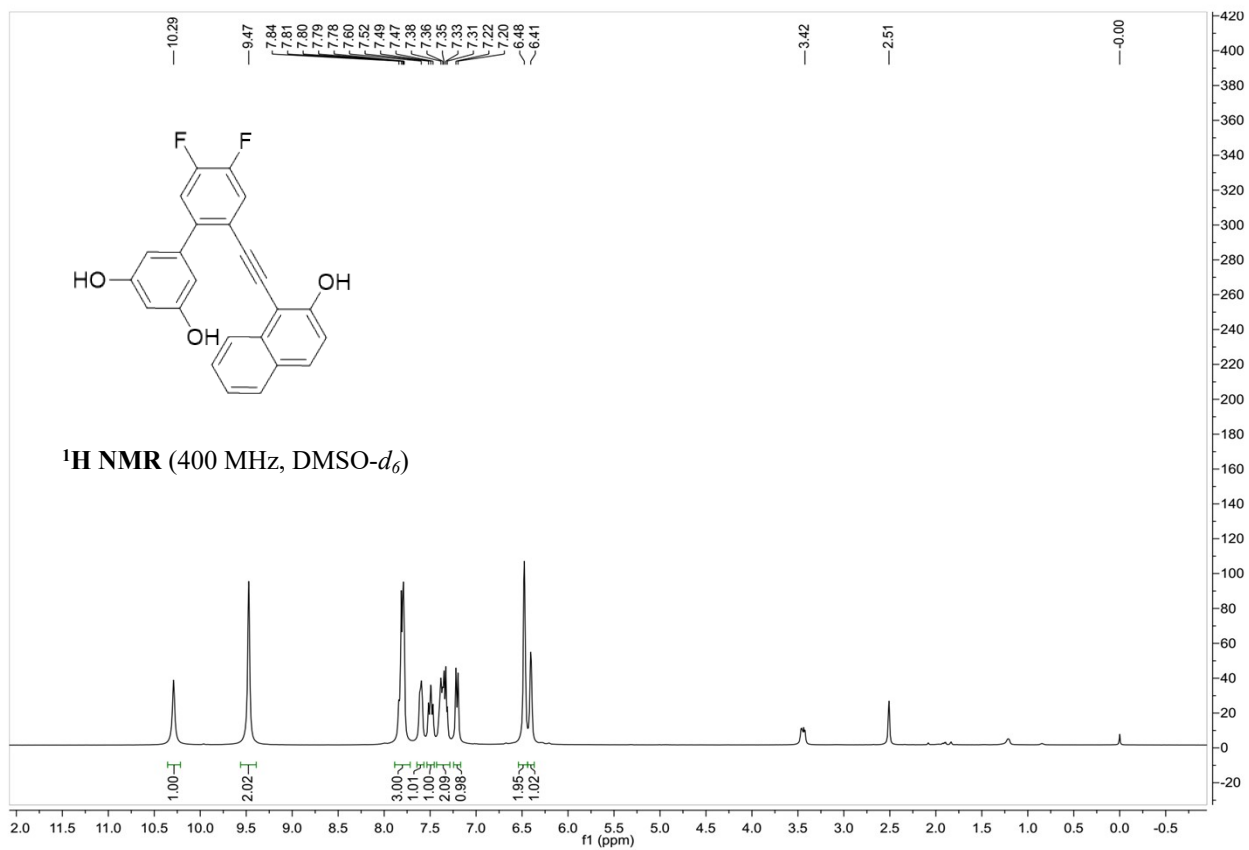

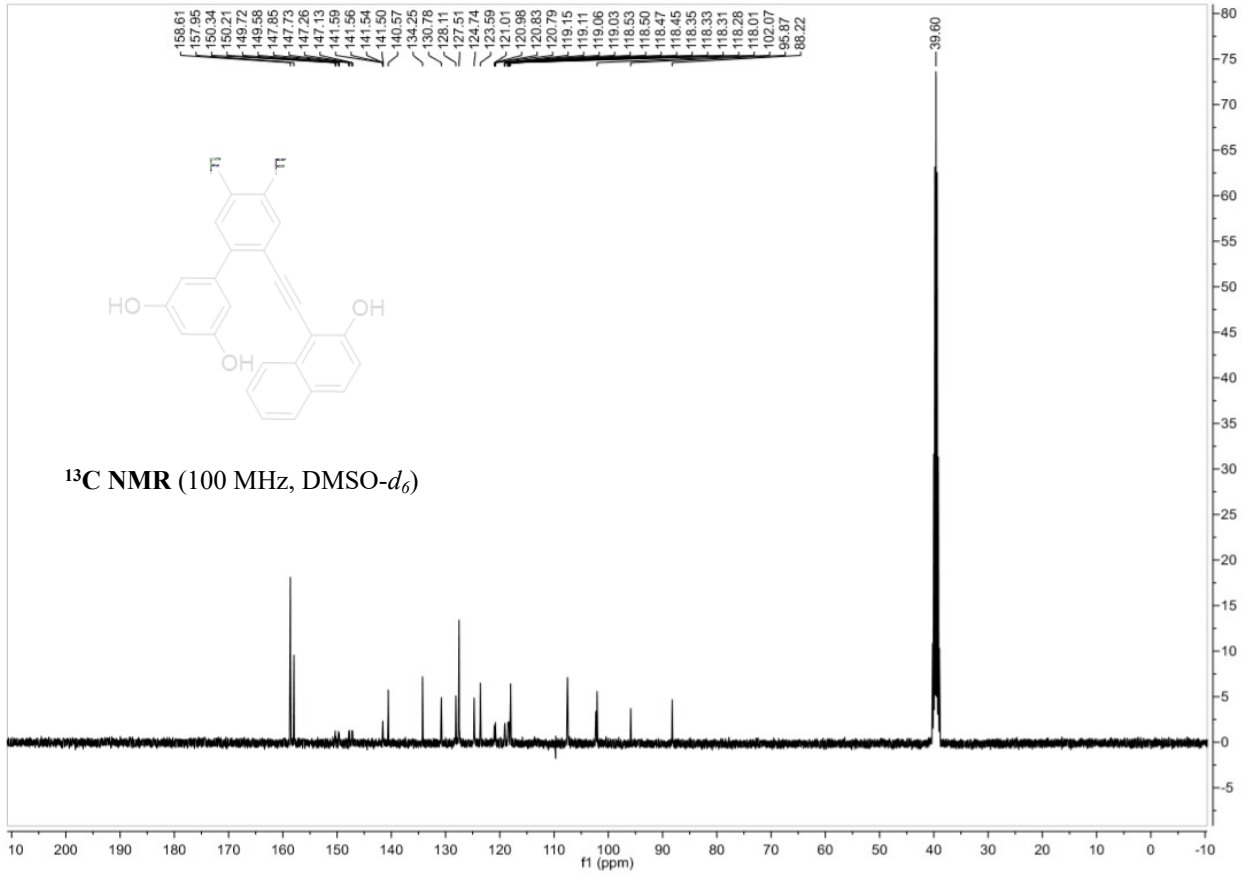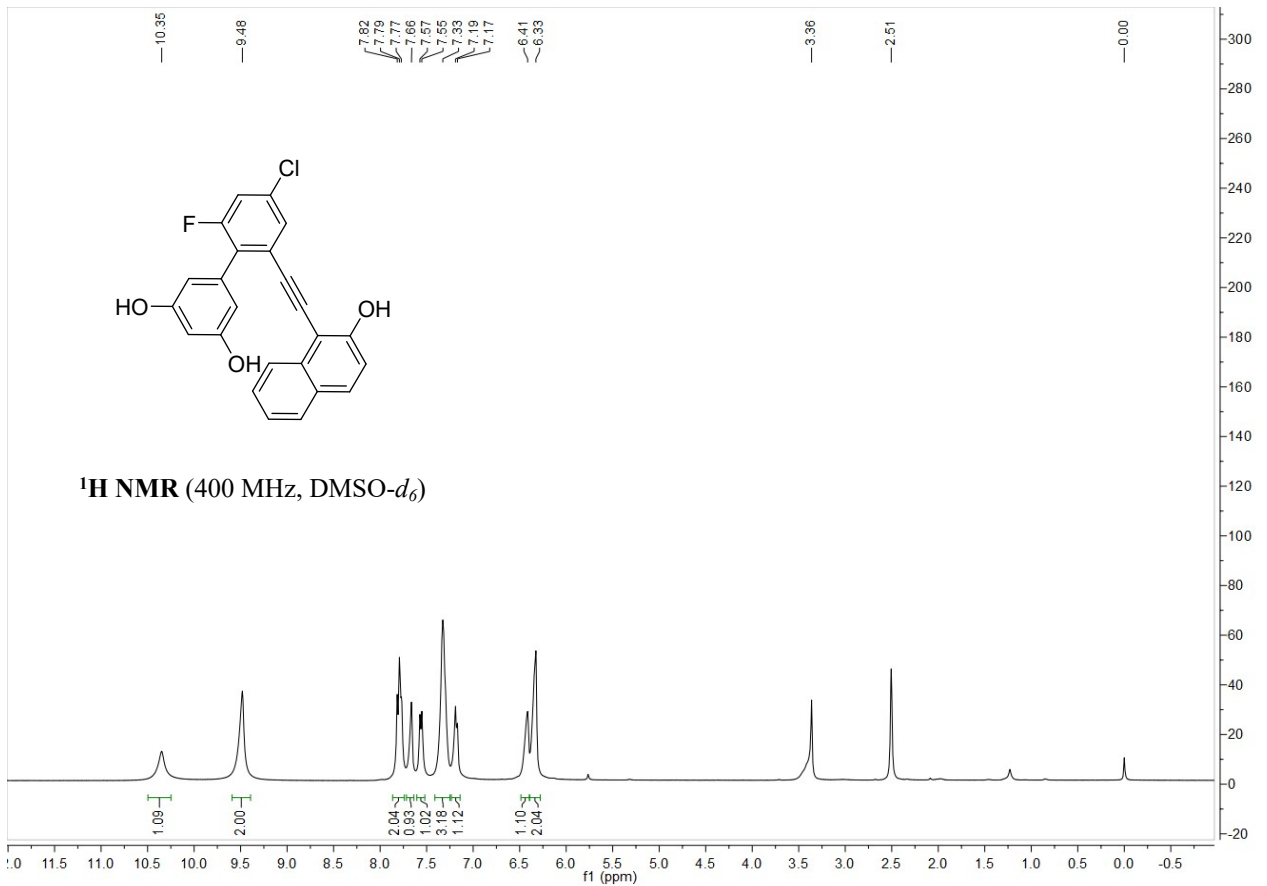

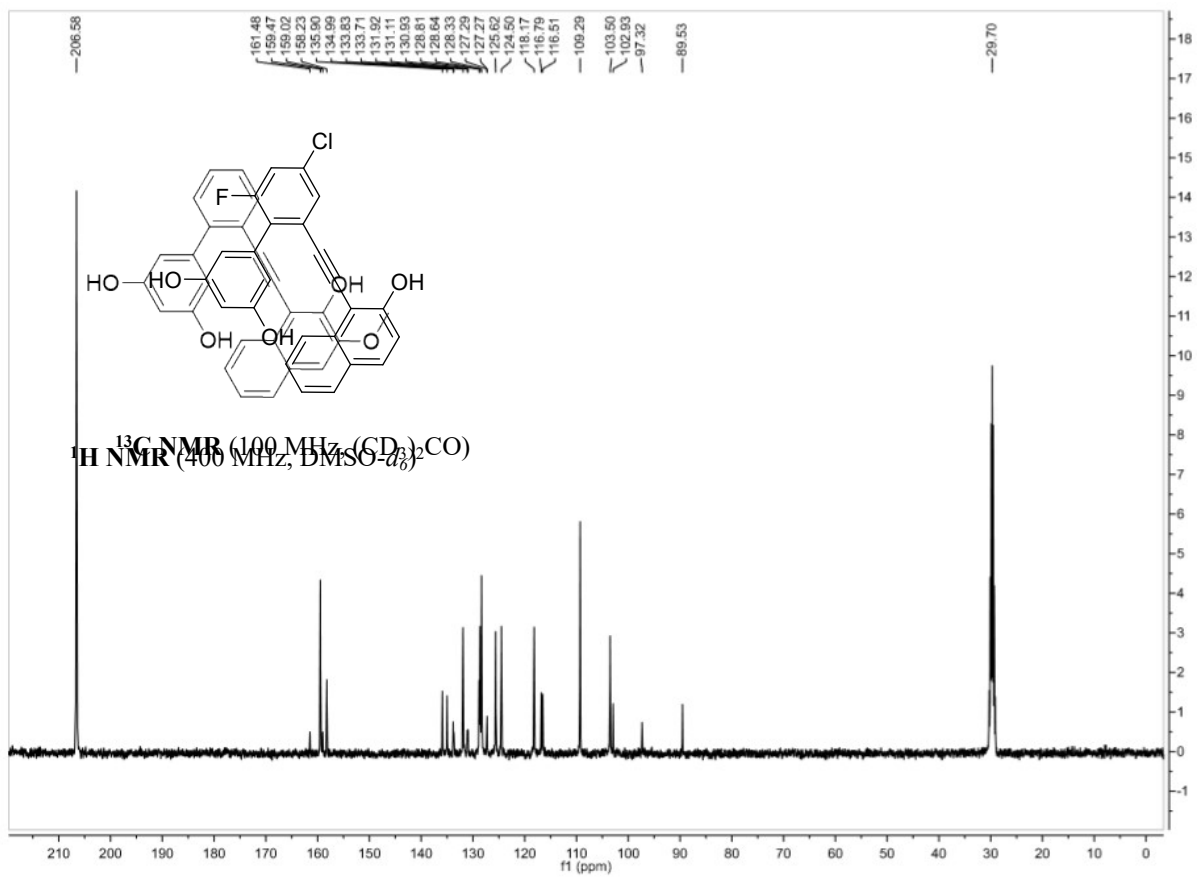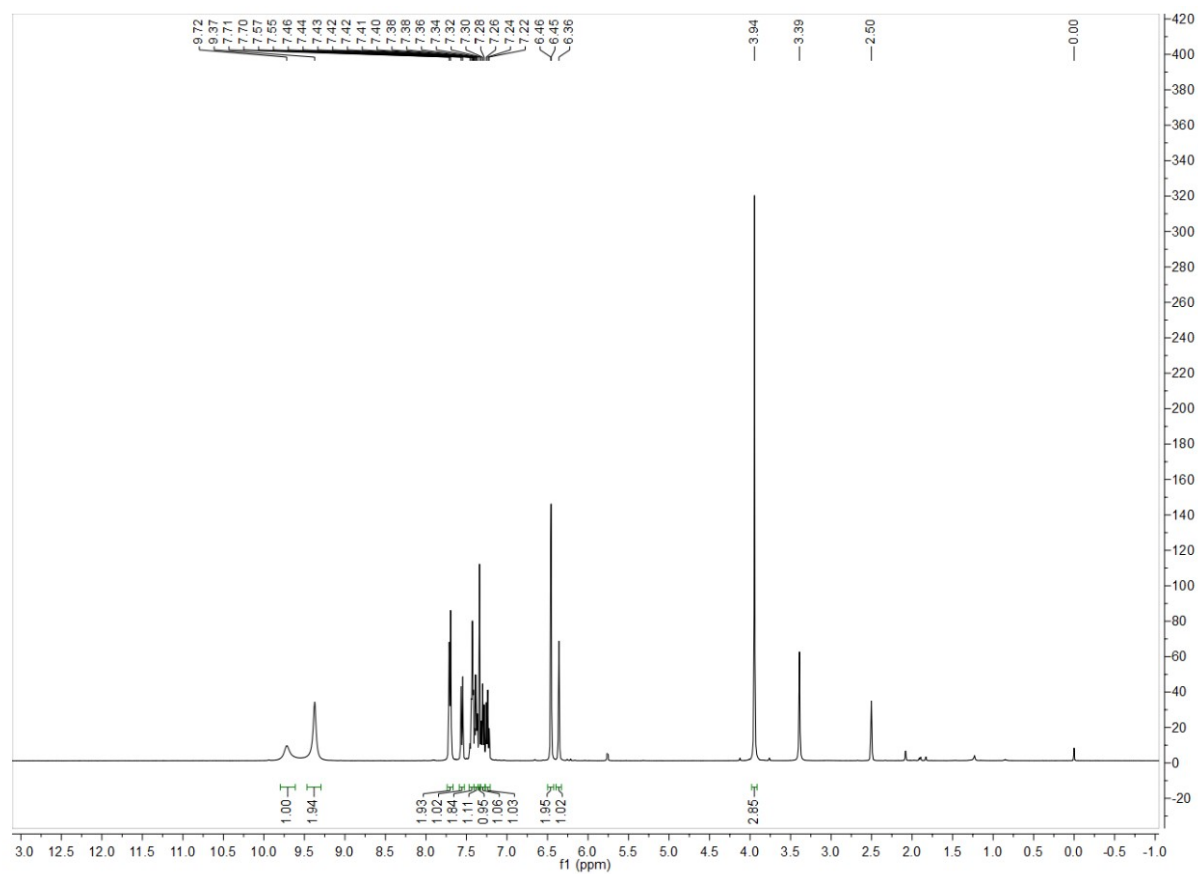



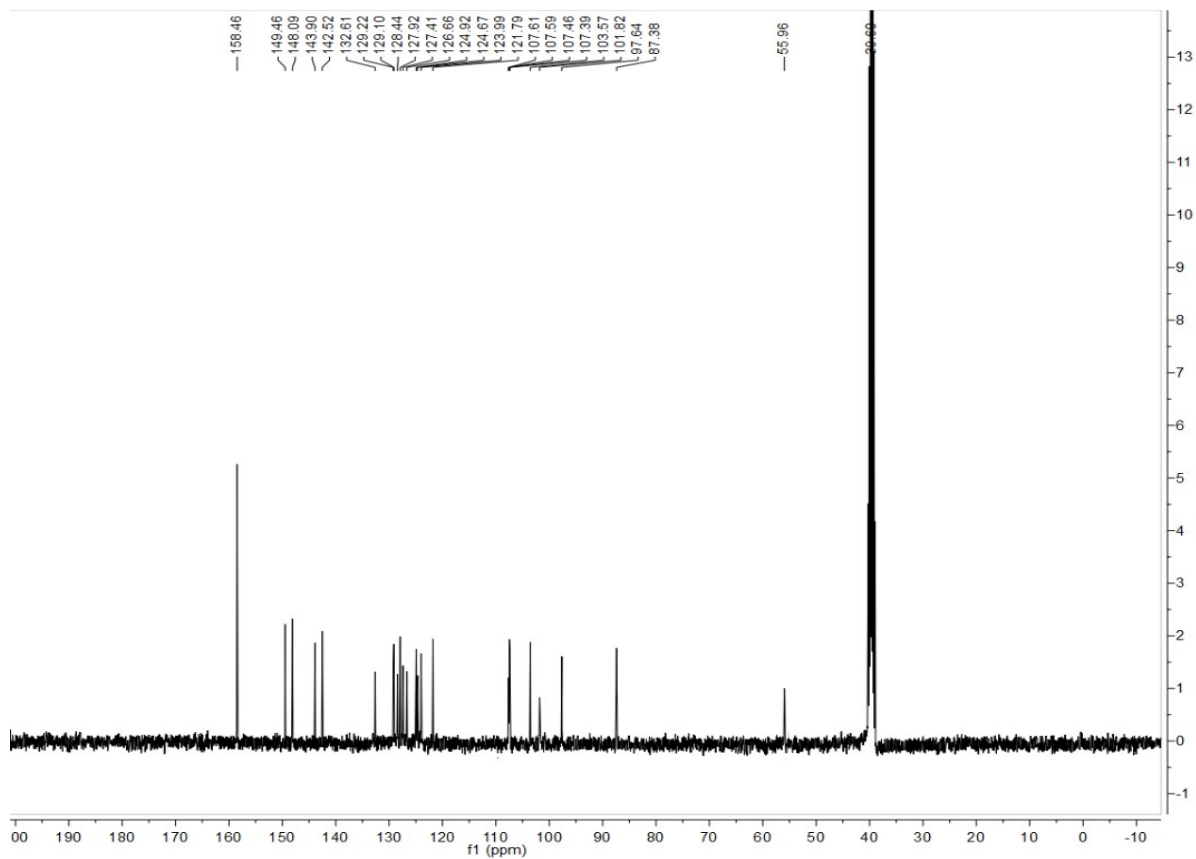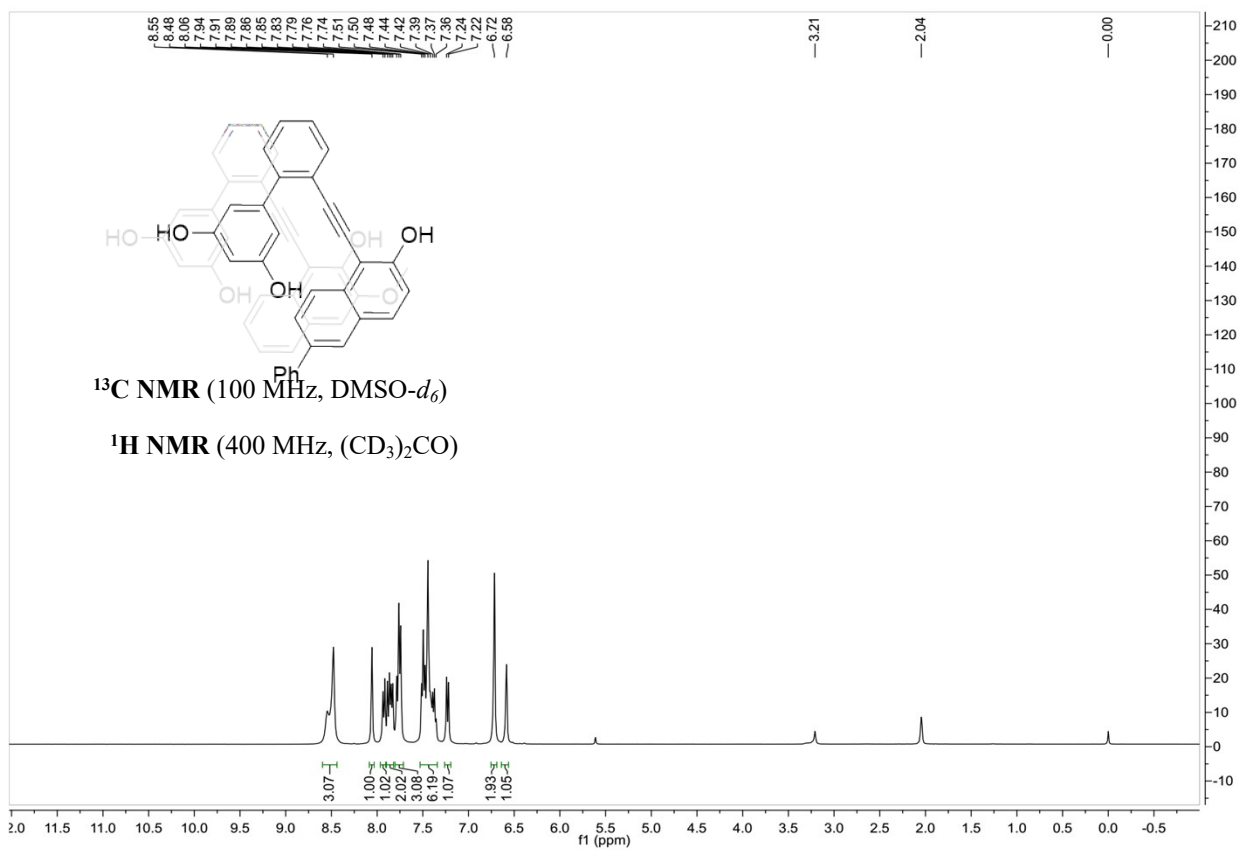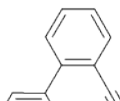

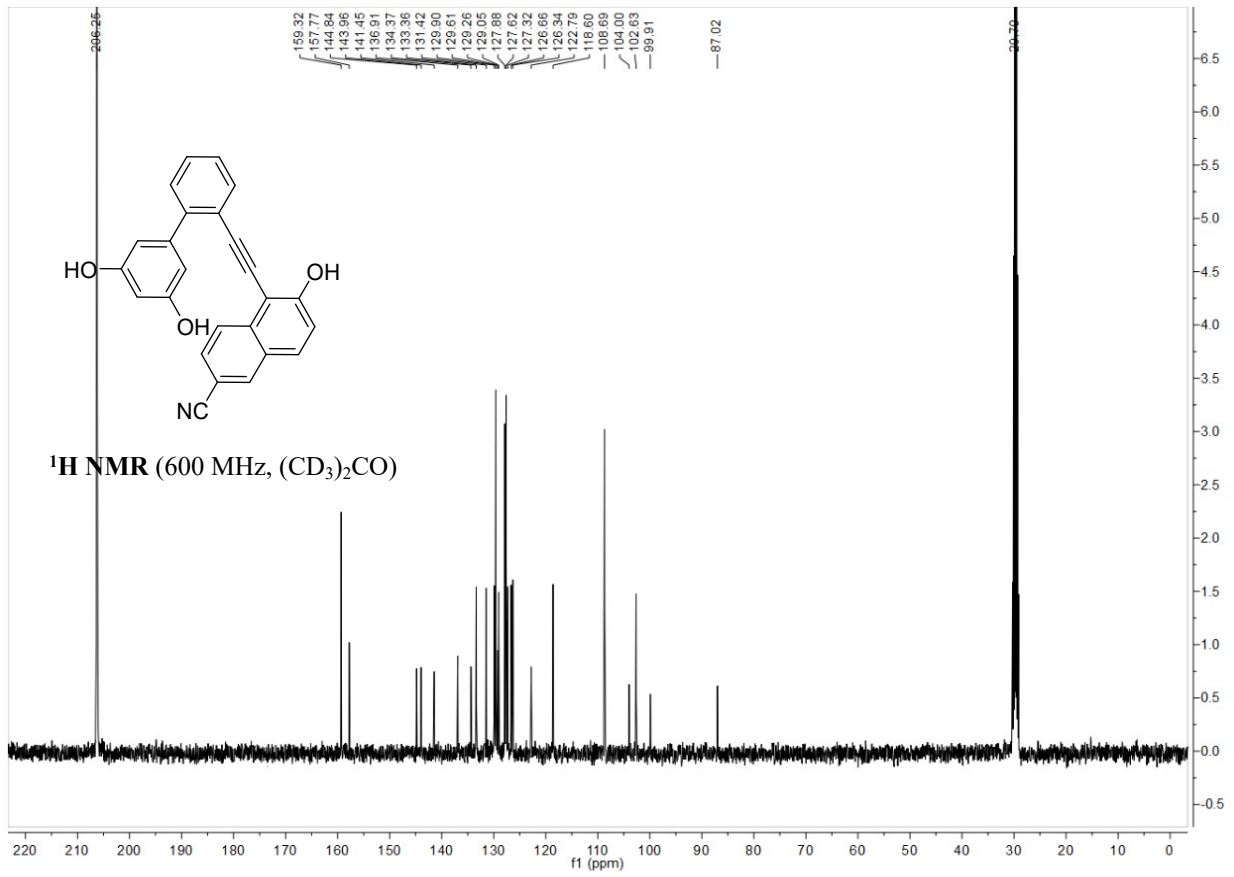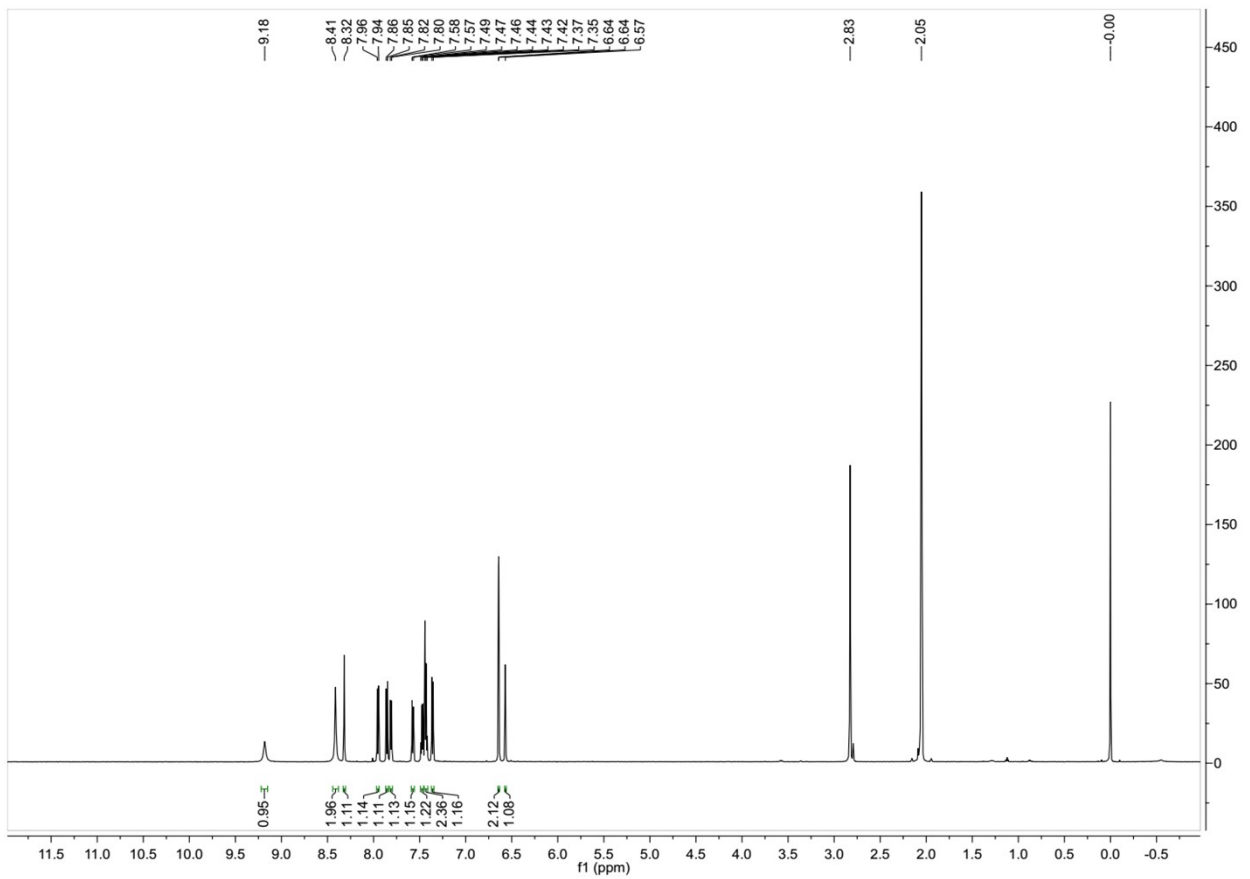

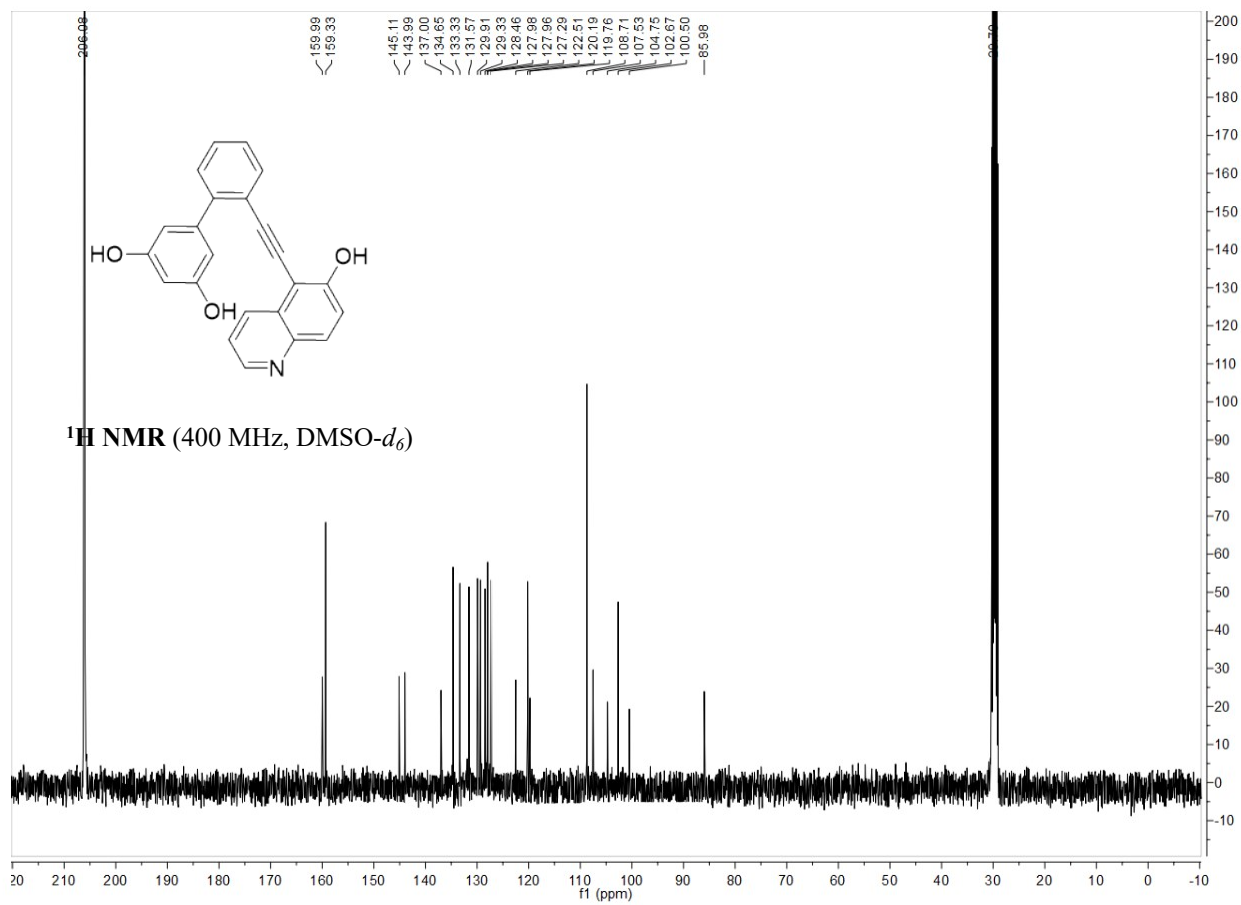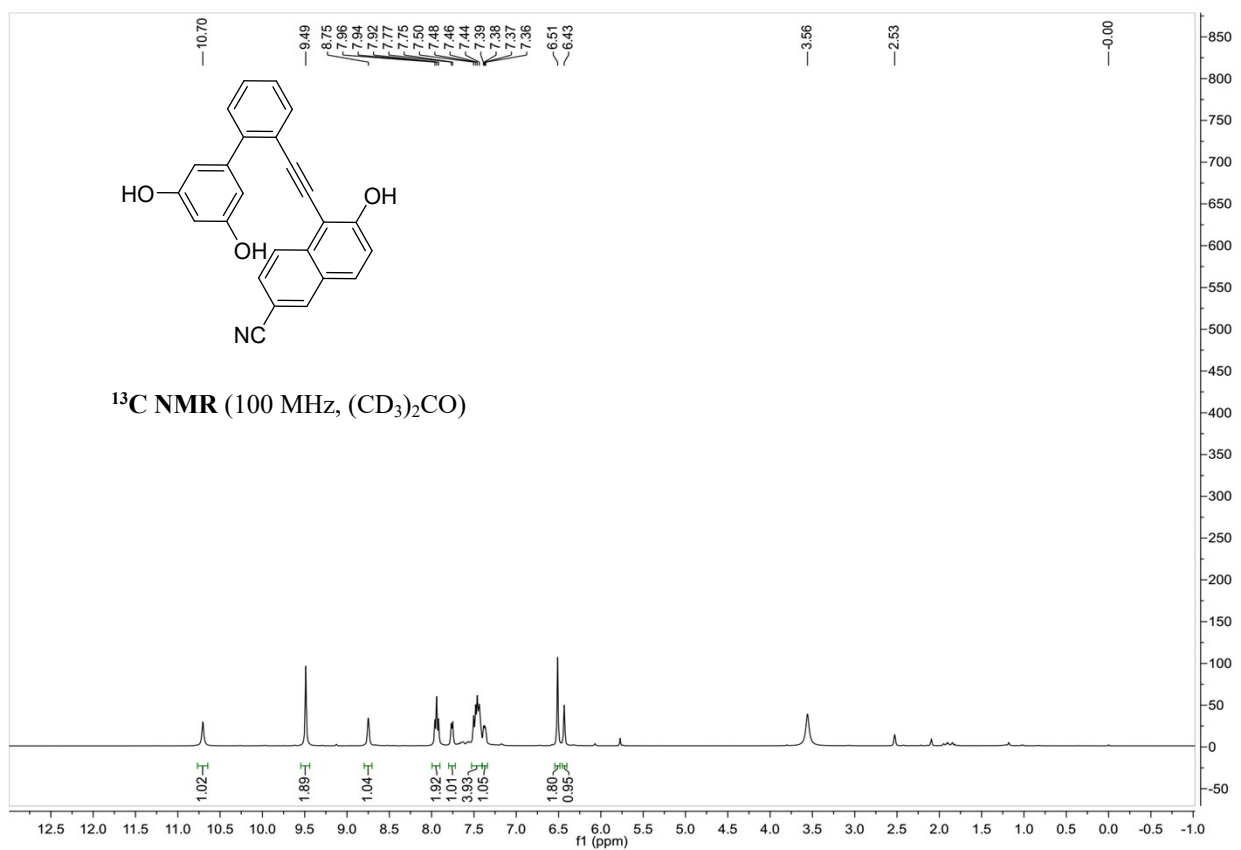

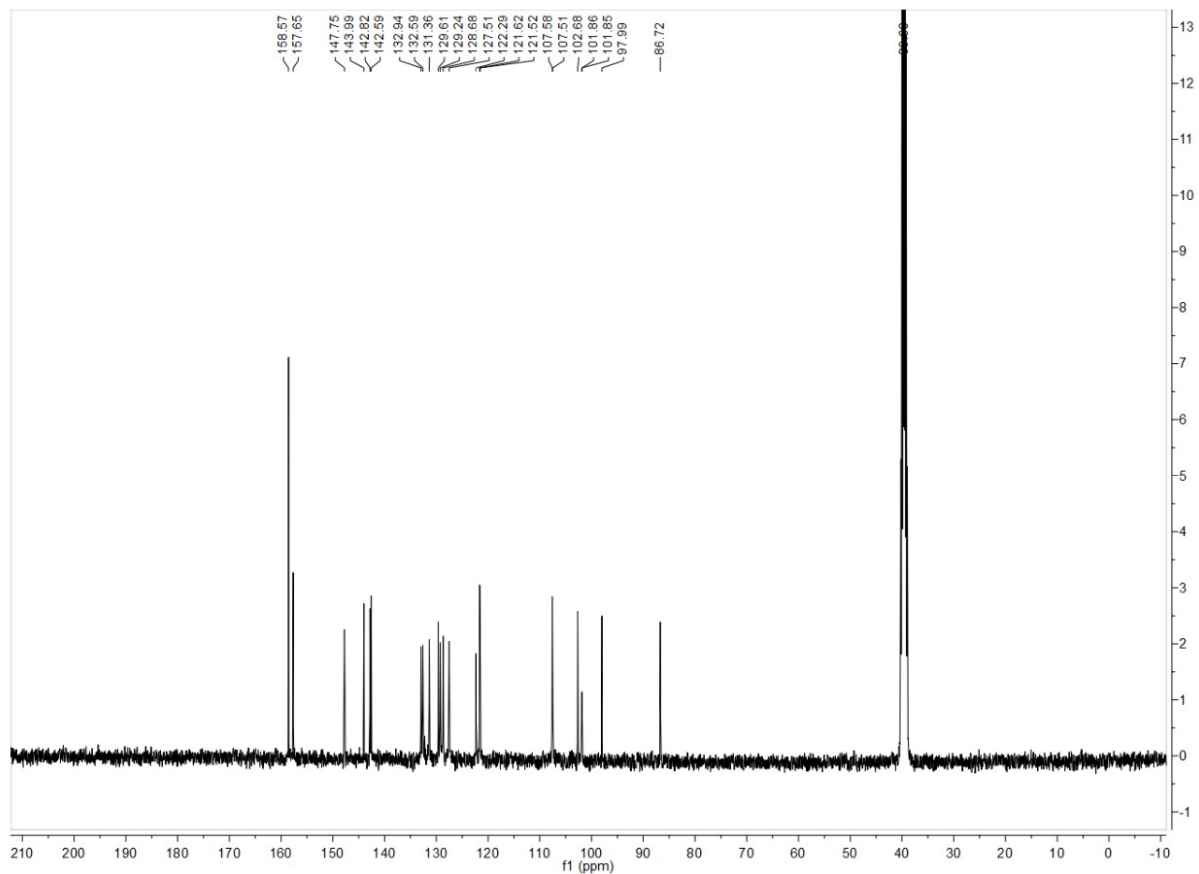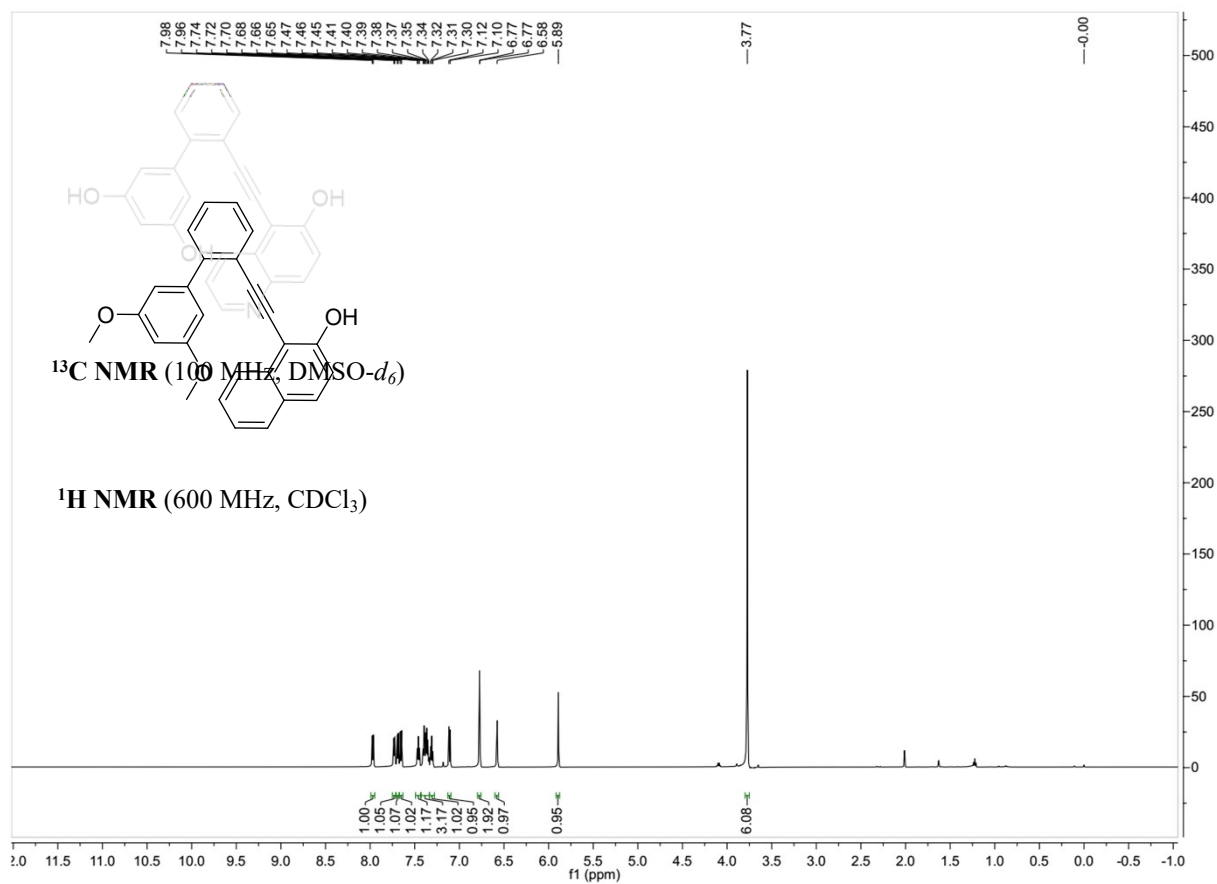

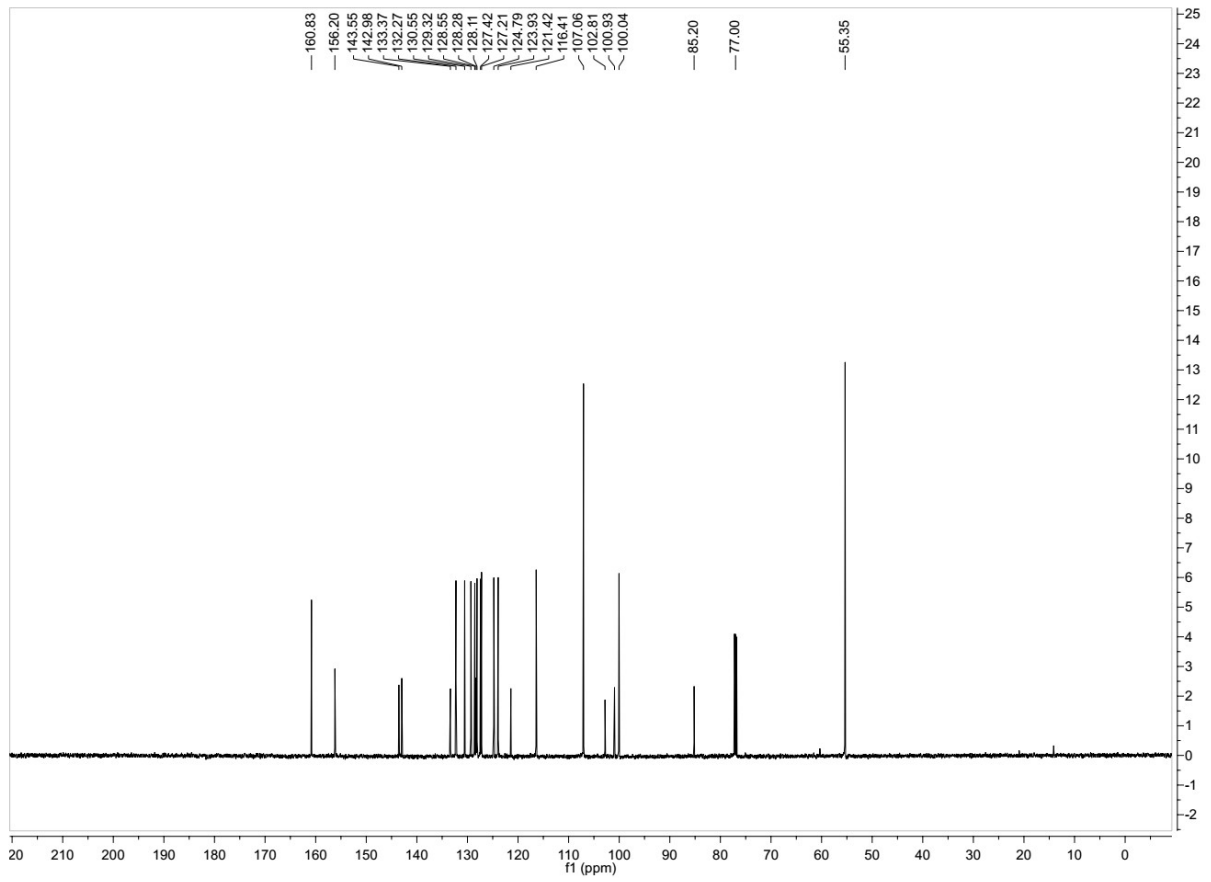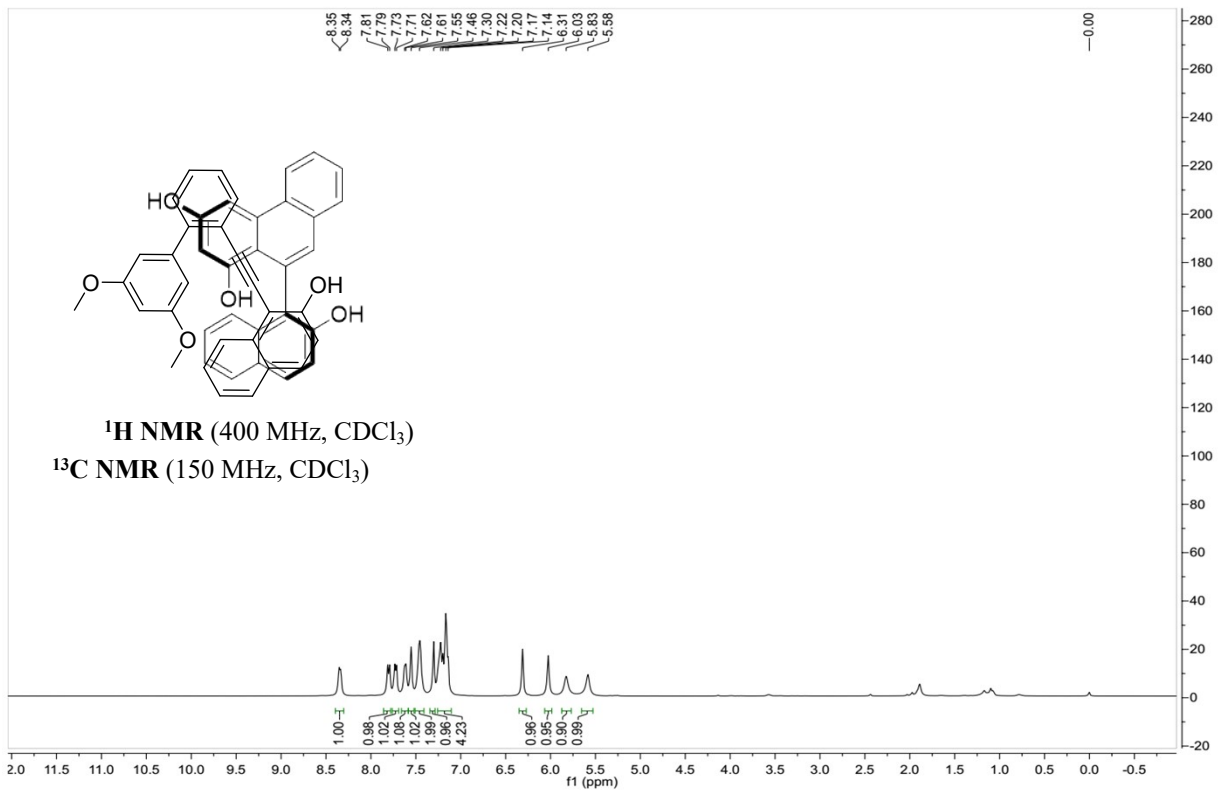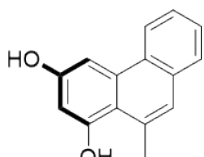

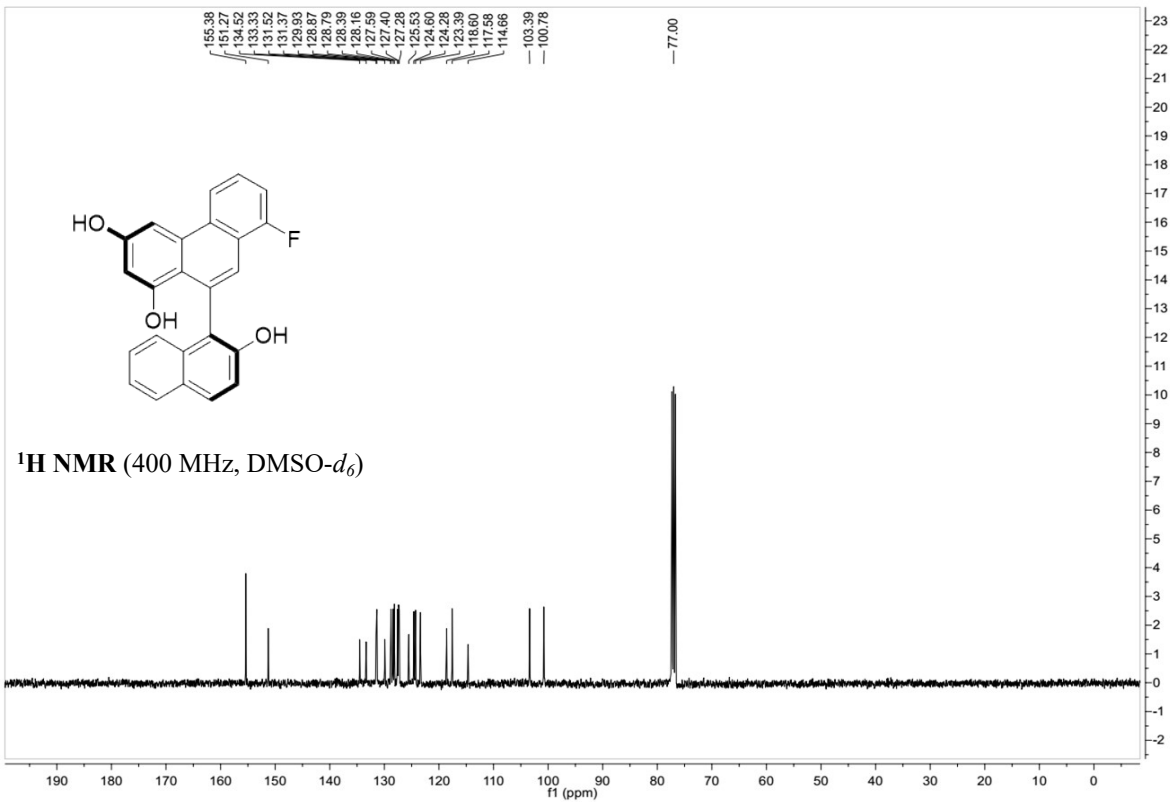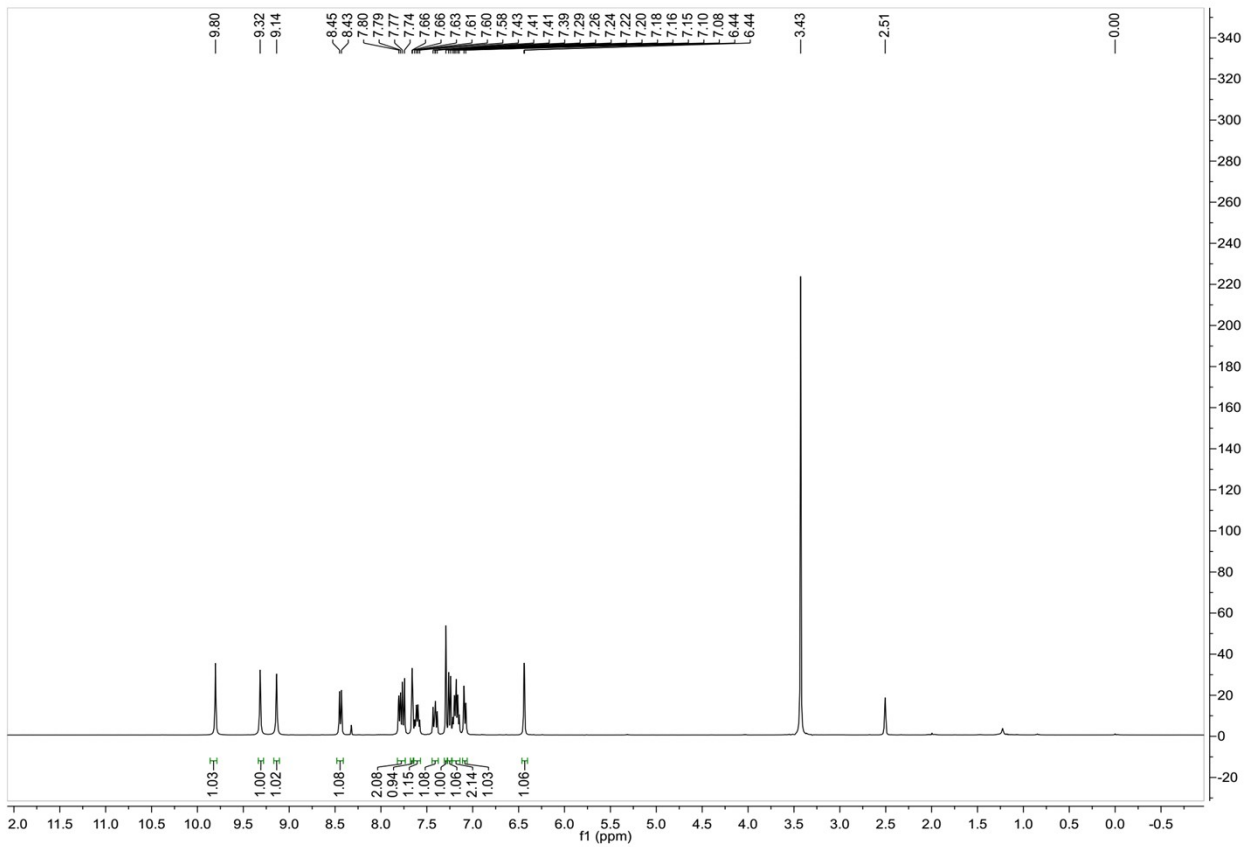

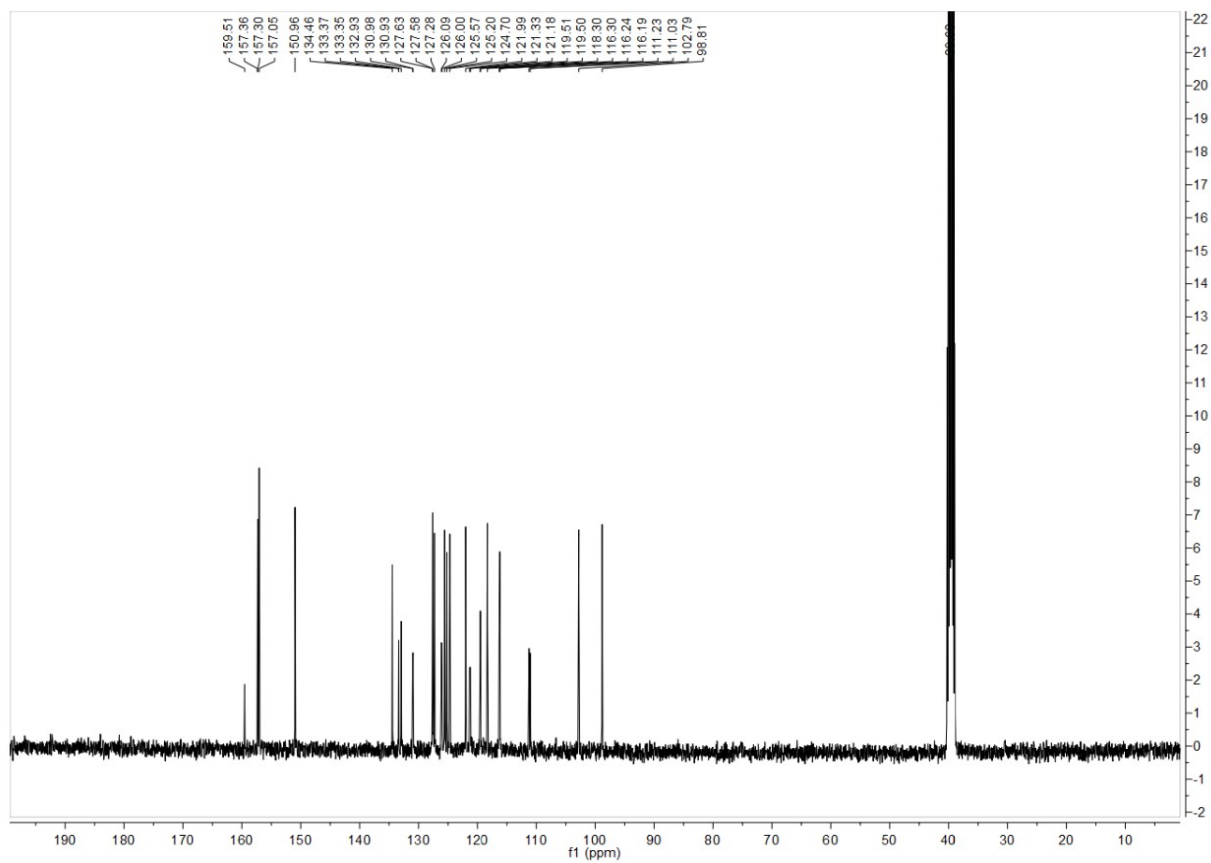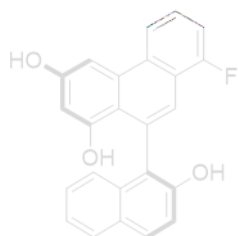

$^{13}\text{C}$  NMR (100 MHz,  $\text{DMSO-}d_6$ )

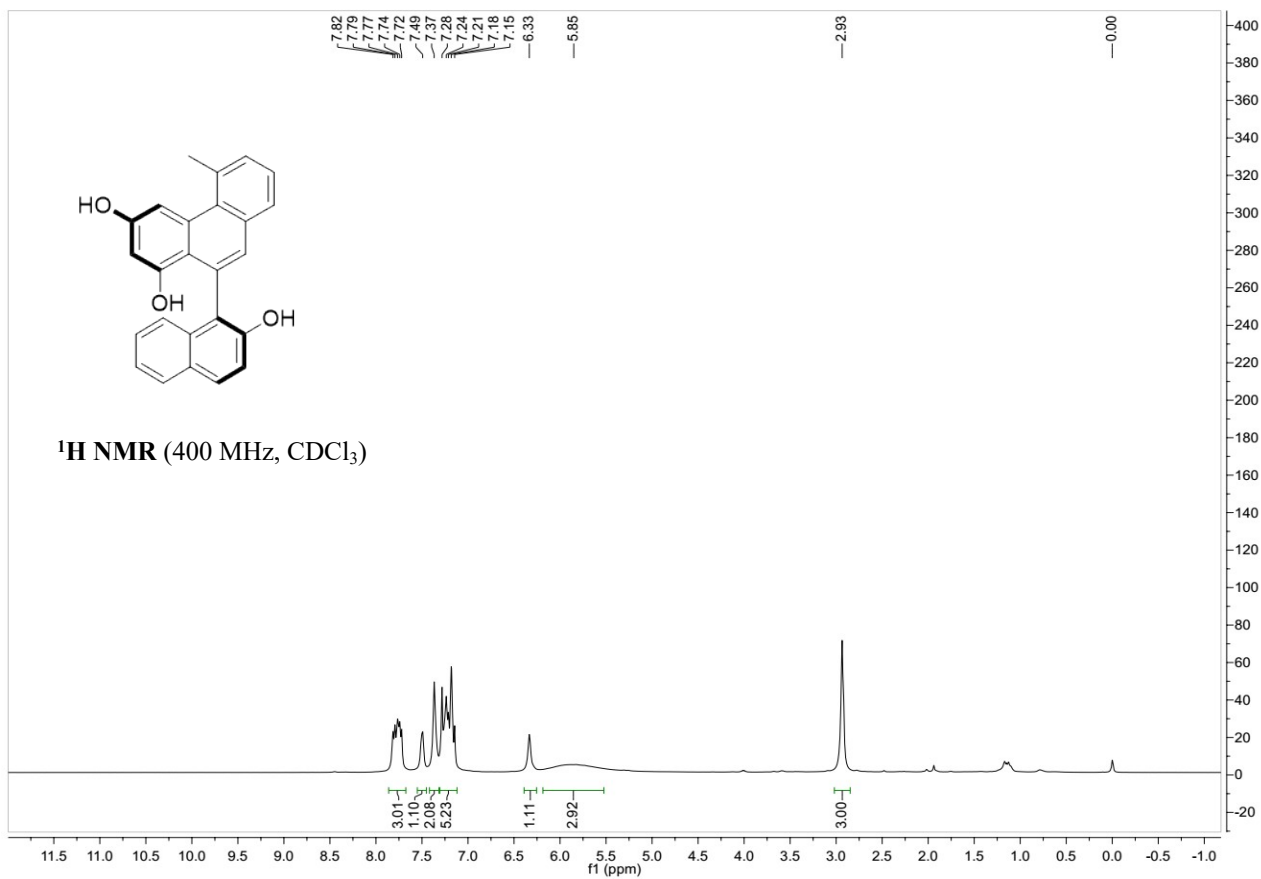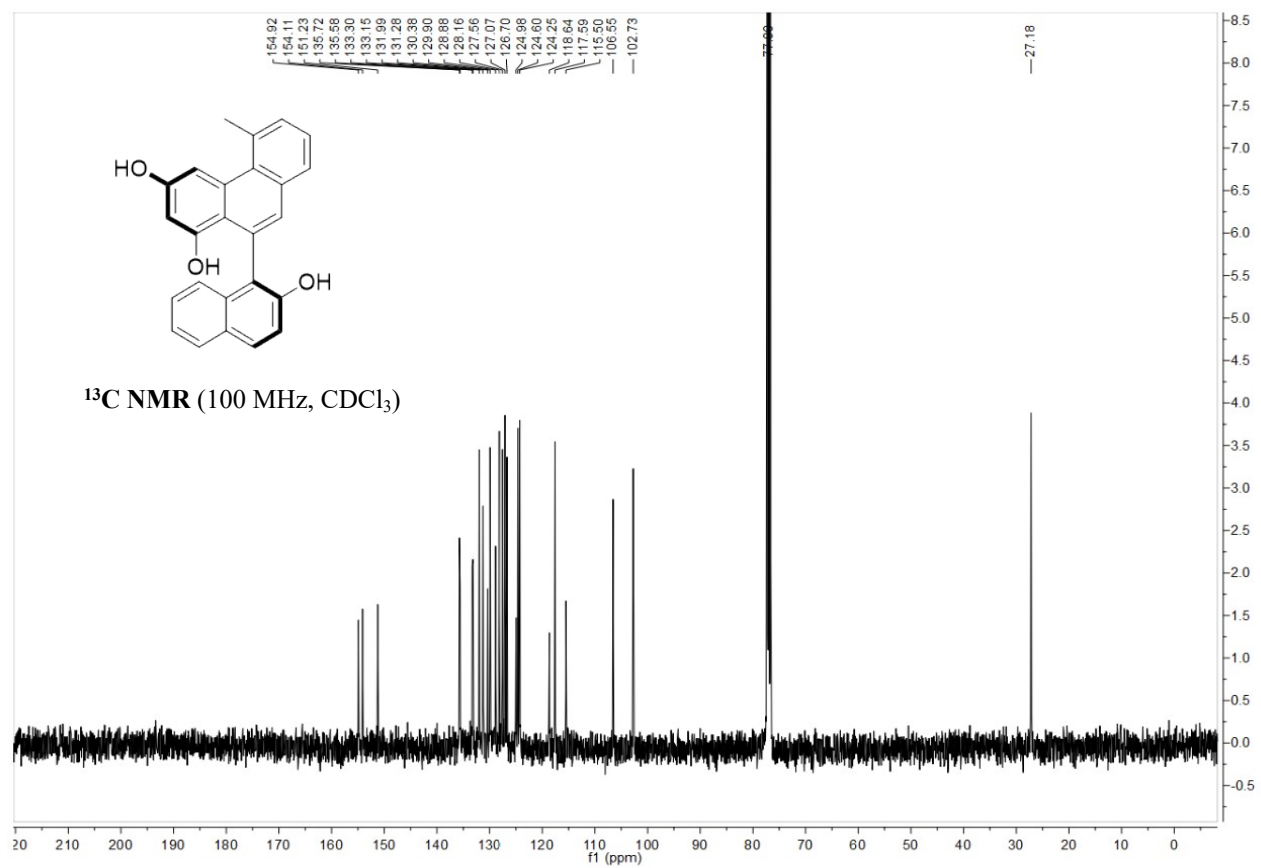



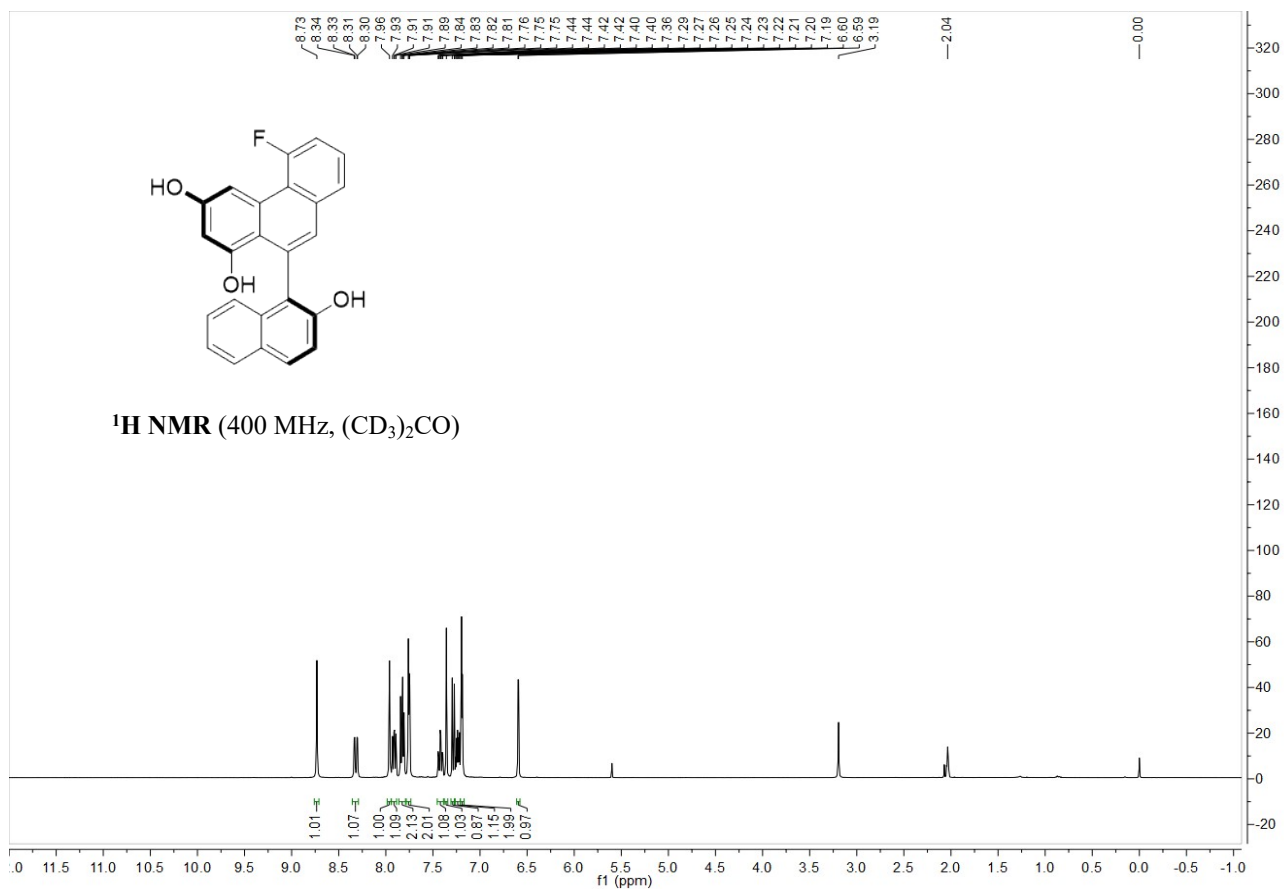

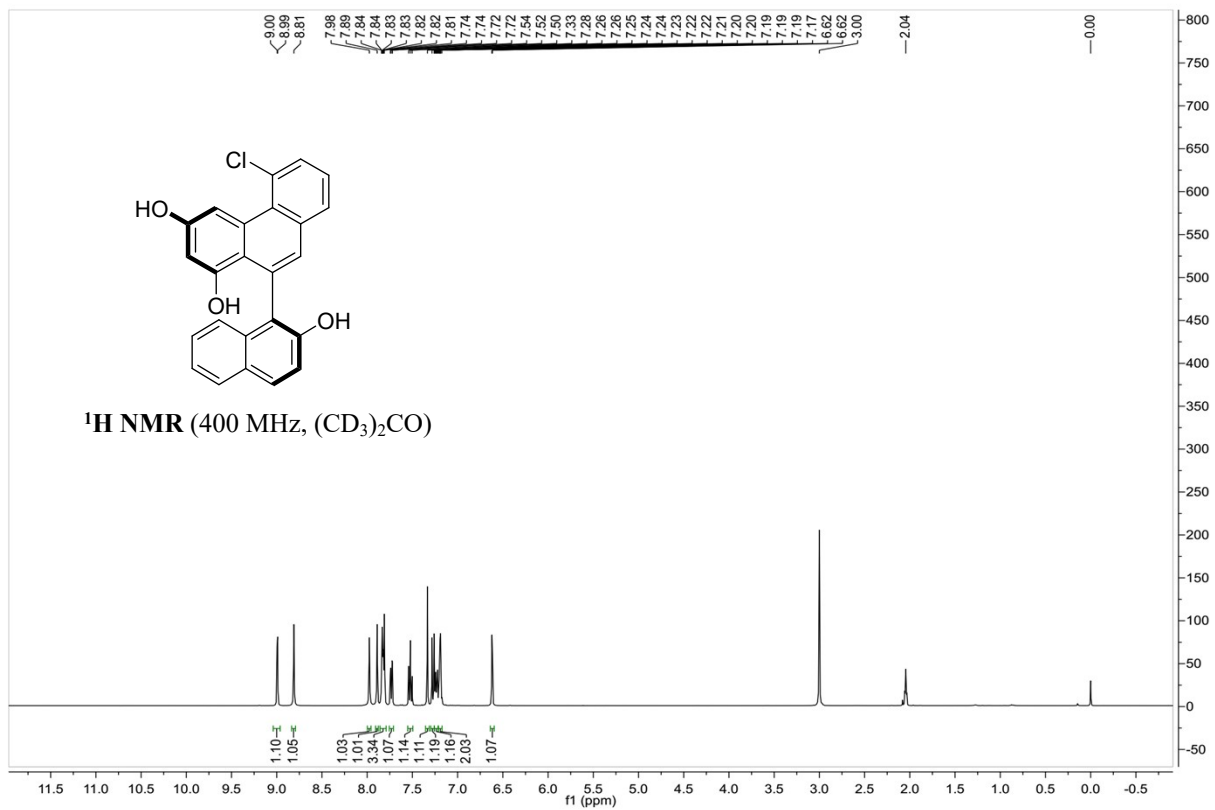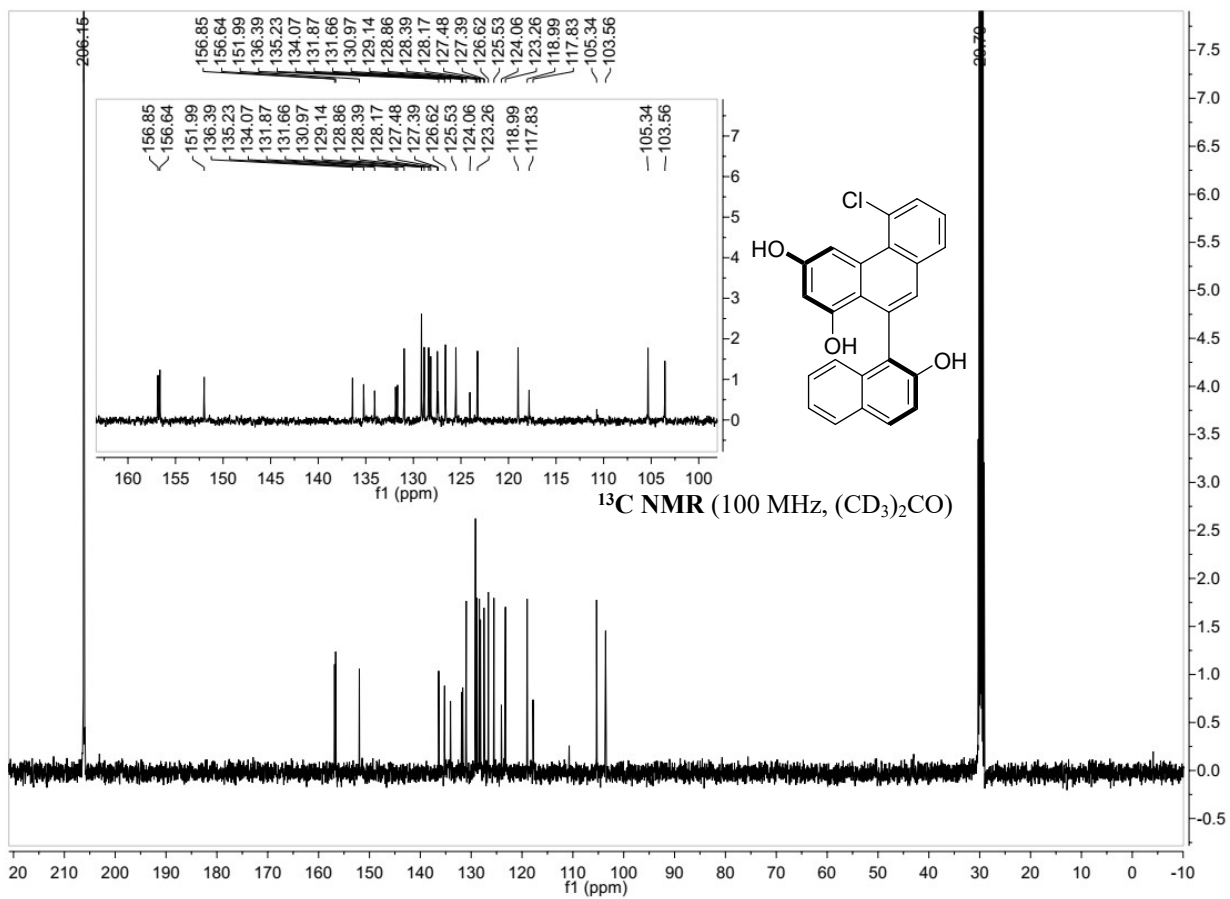



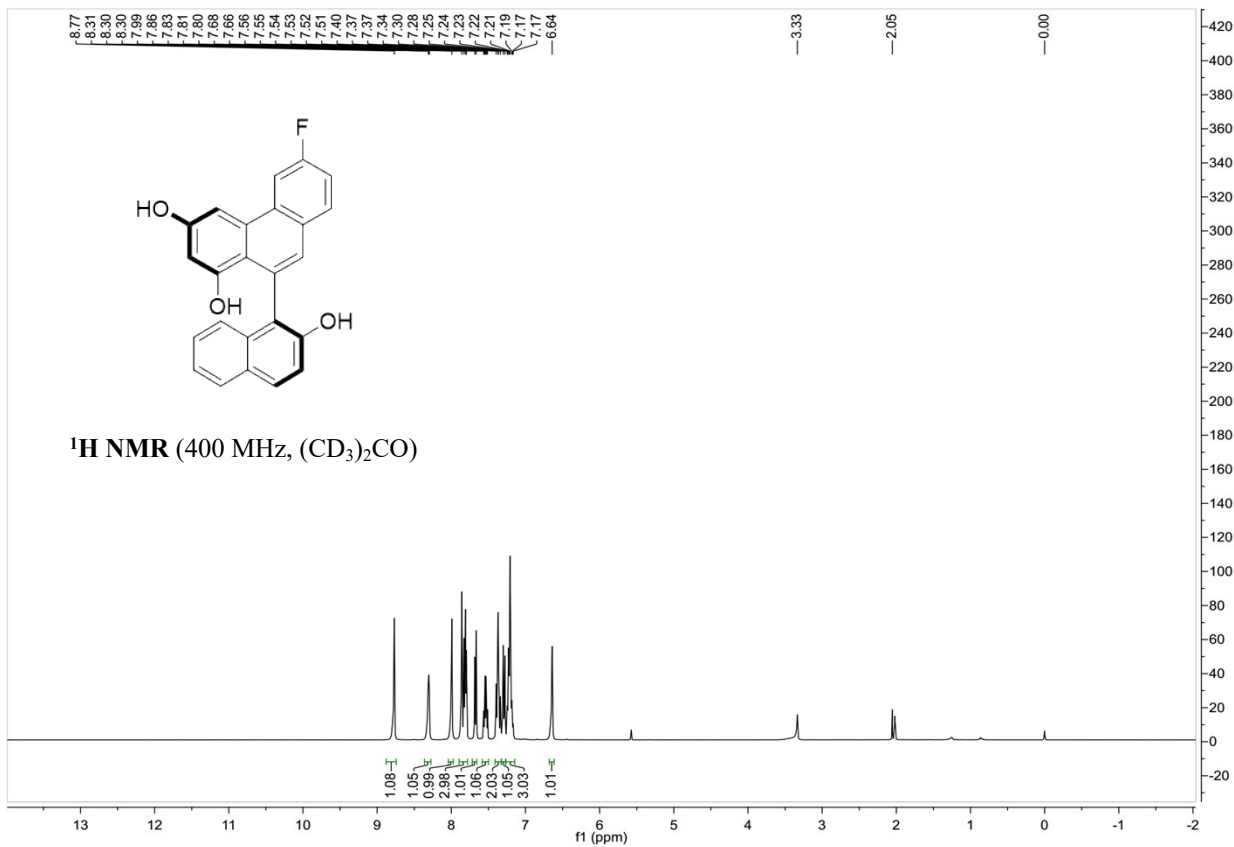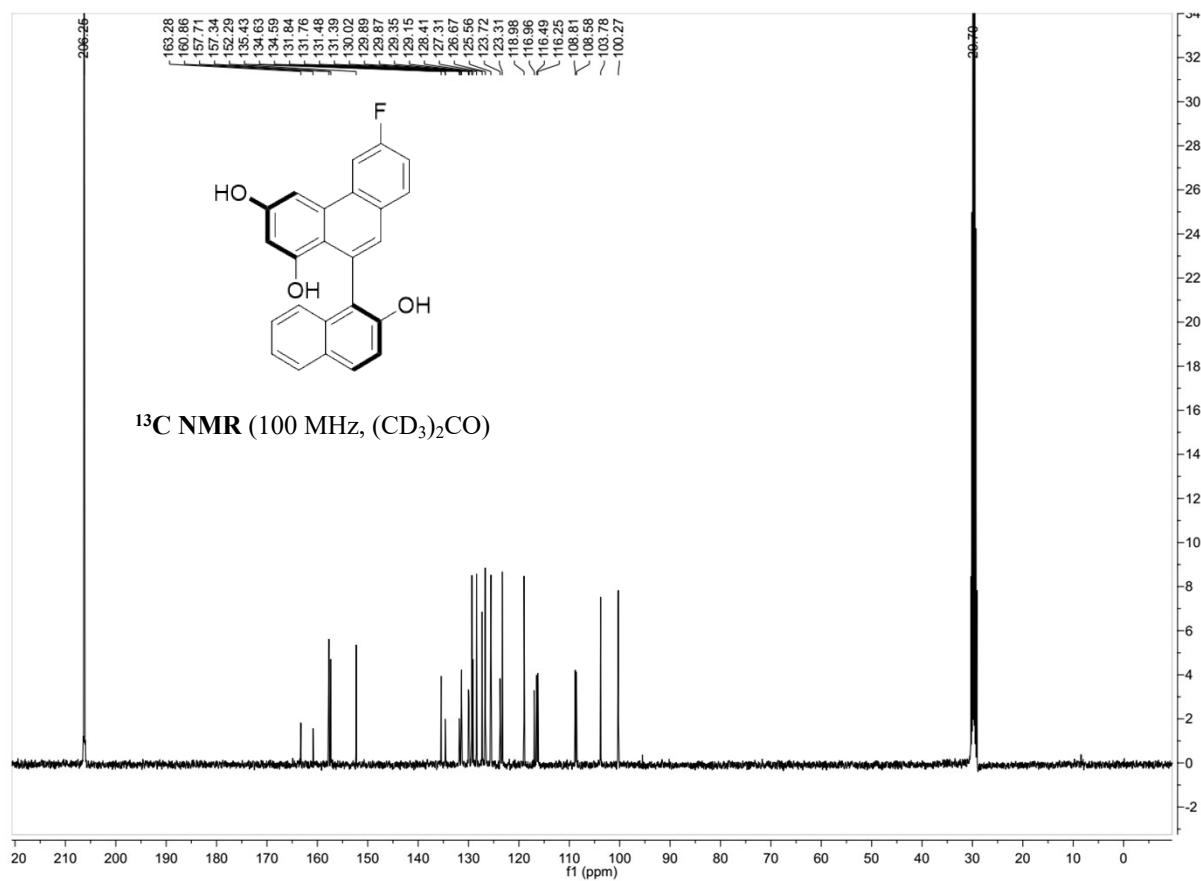

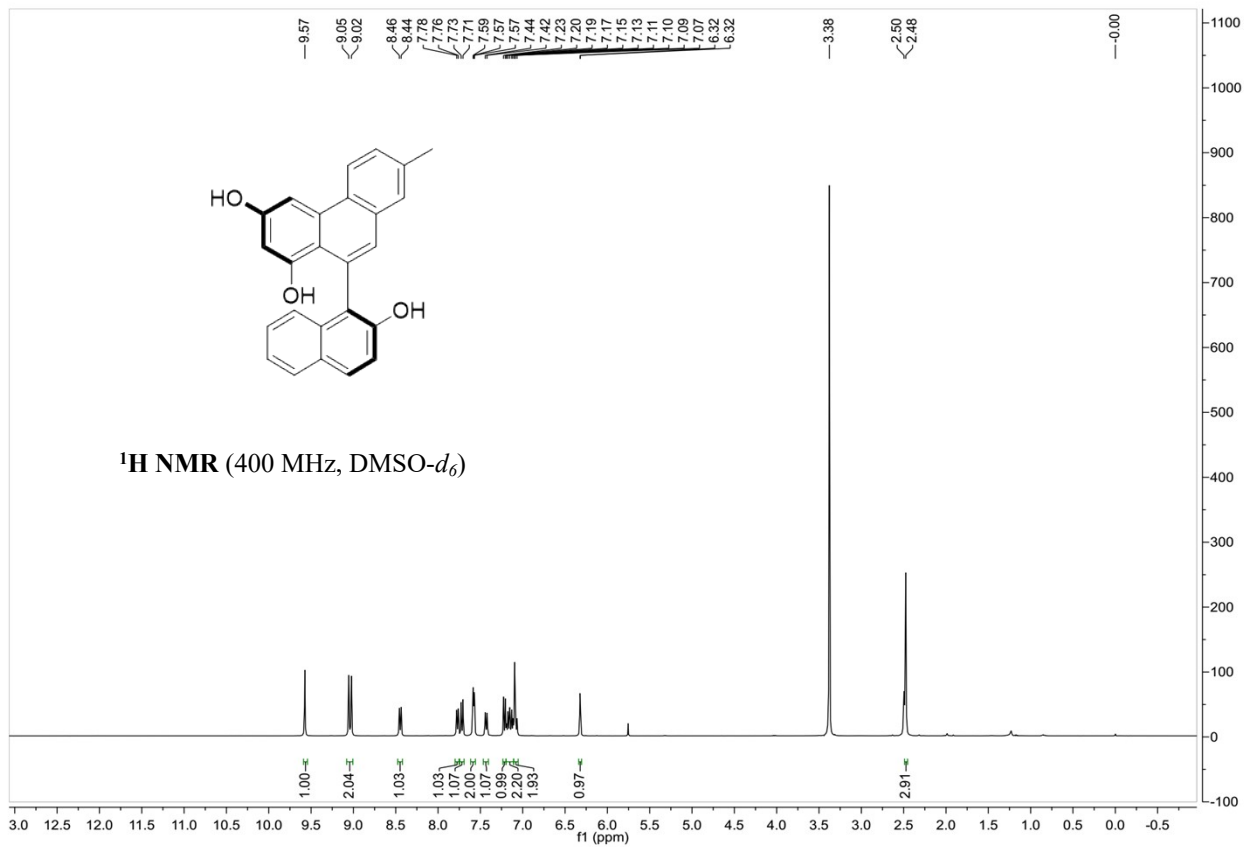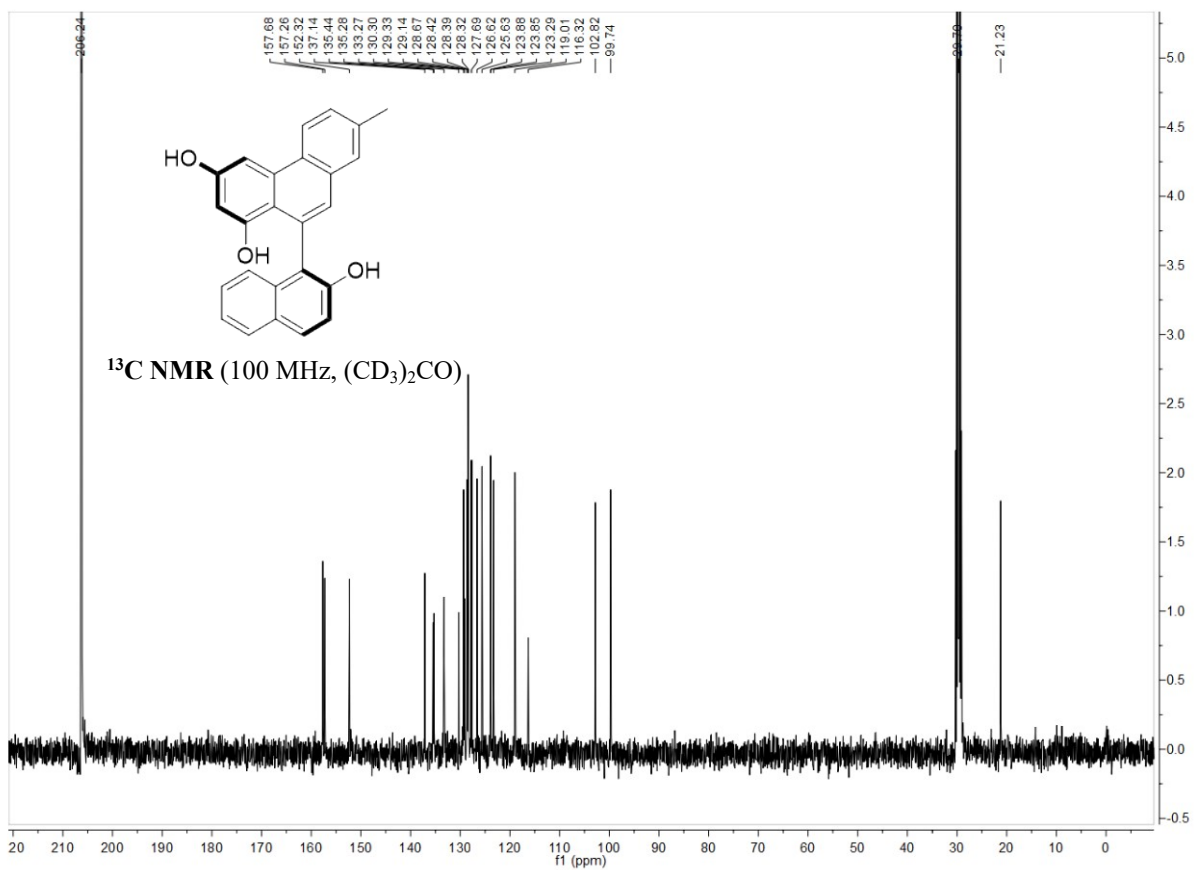

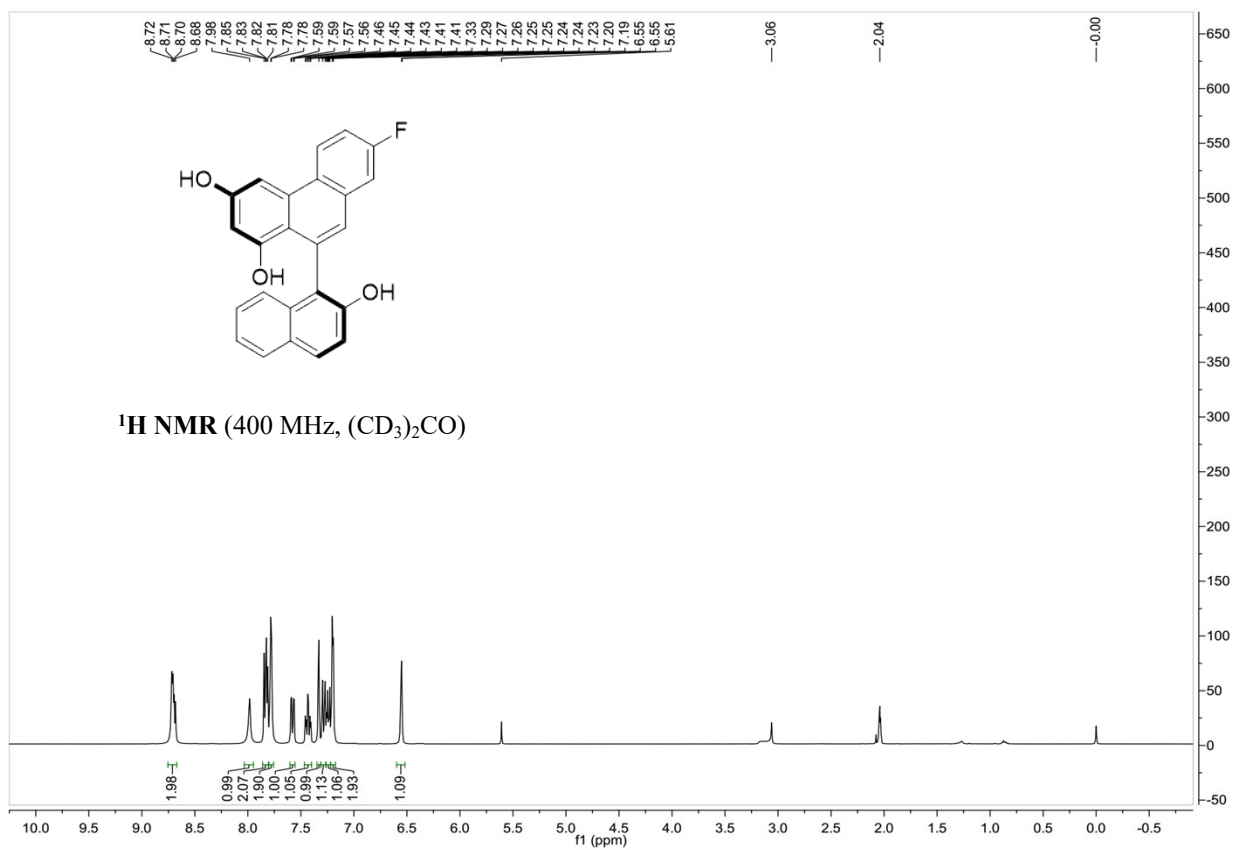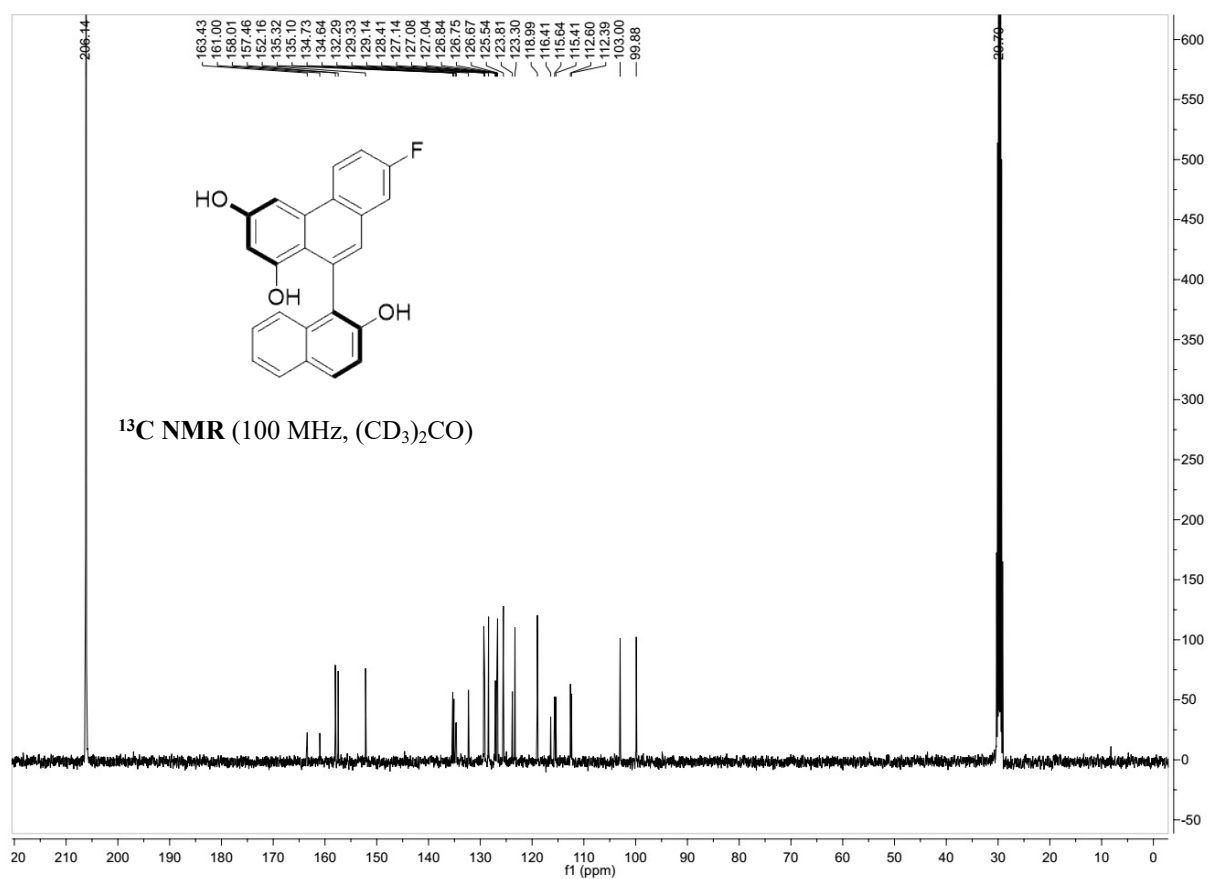

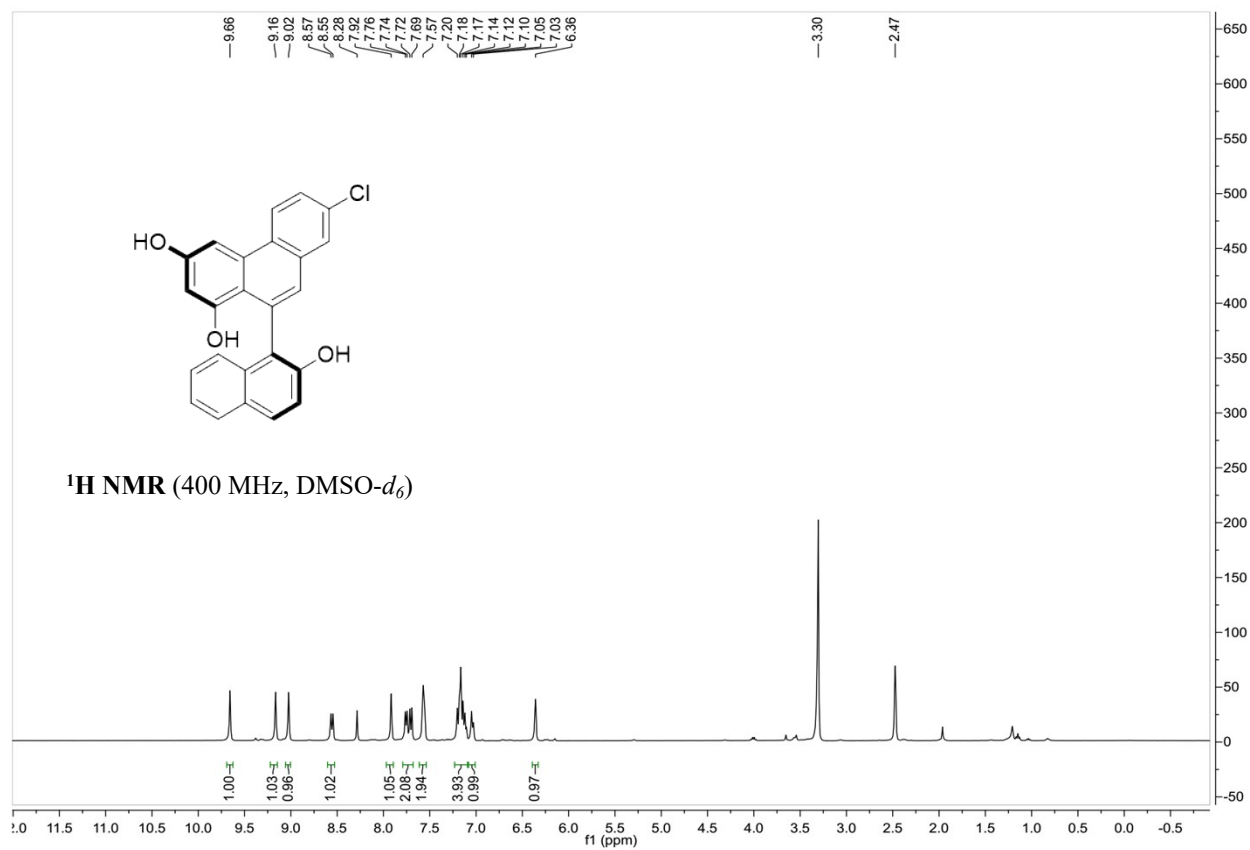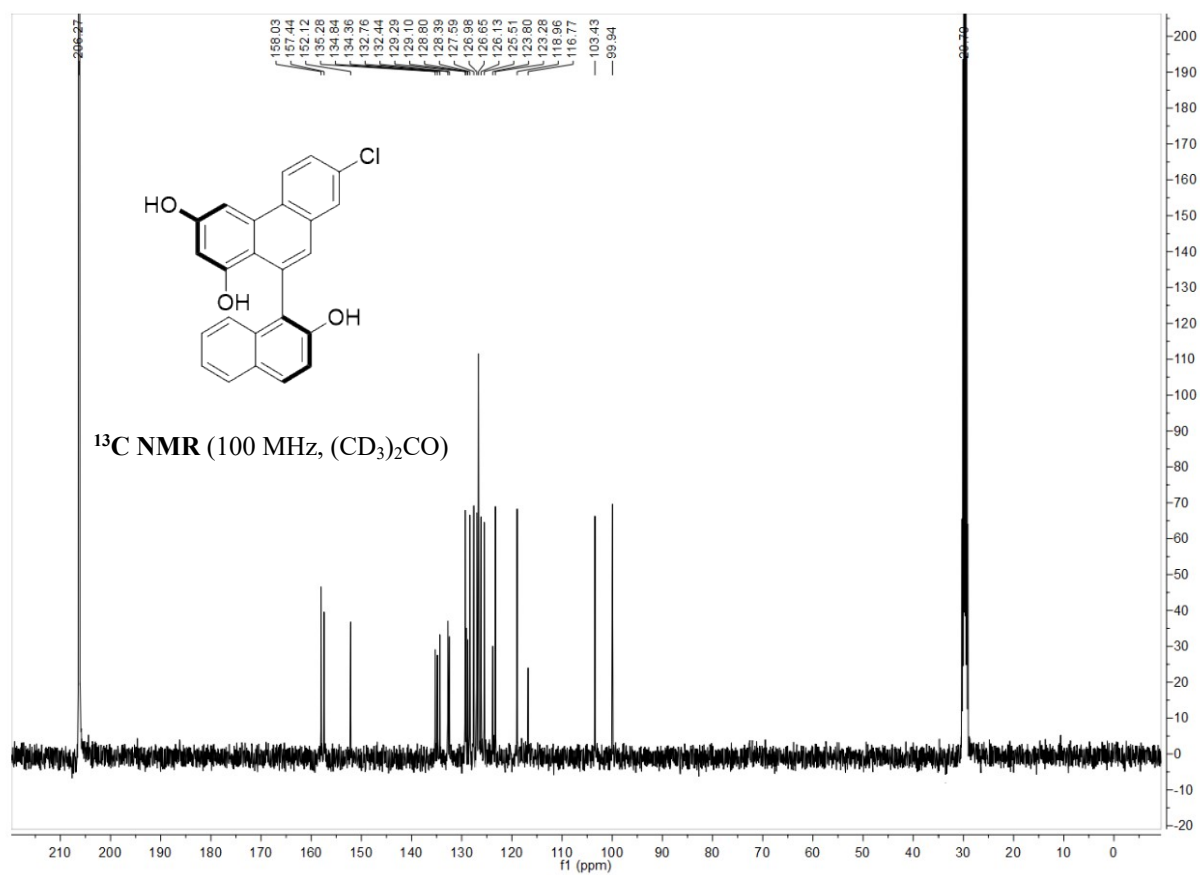

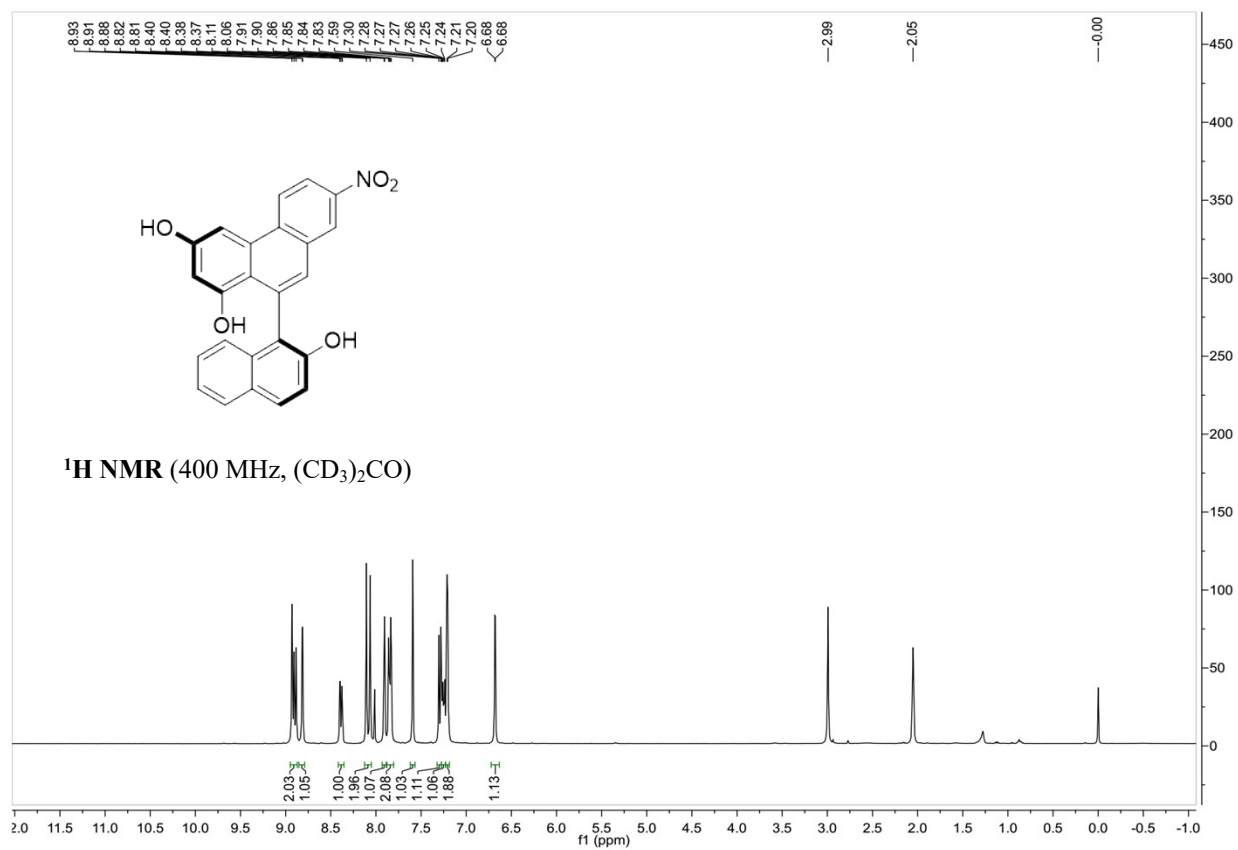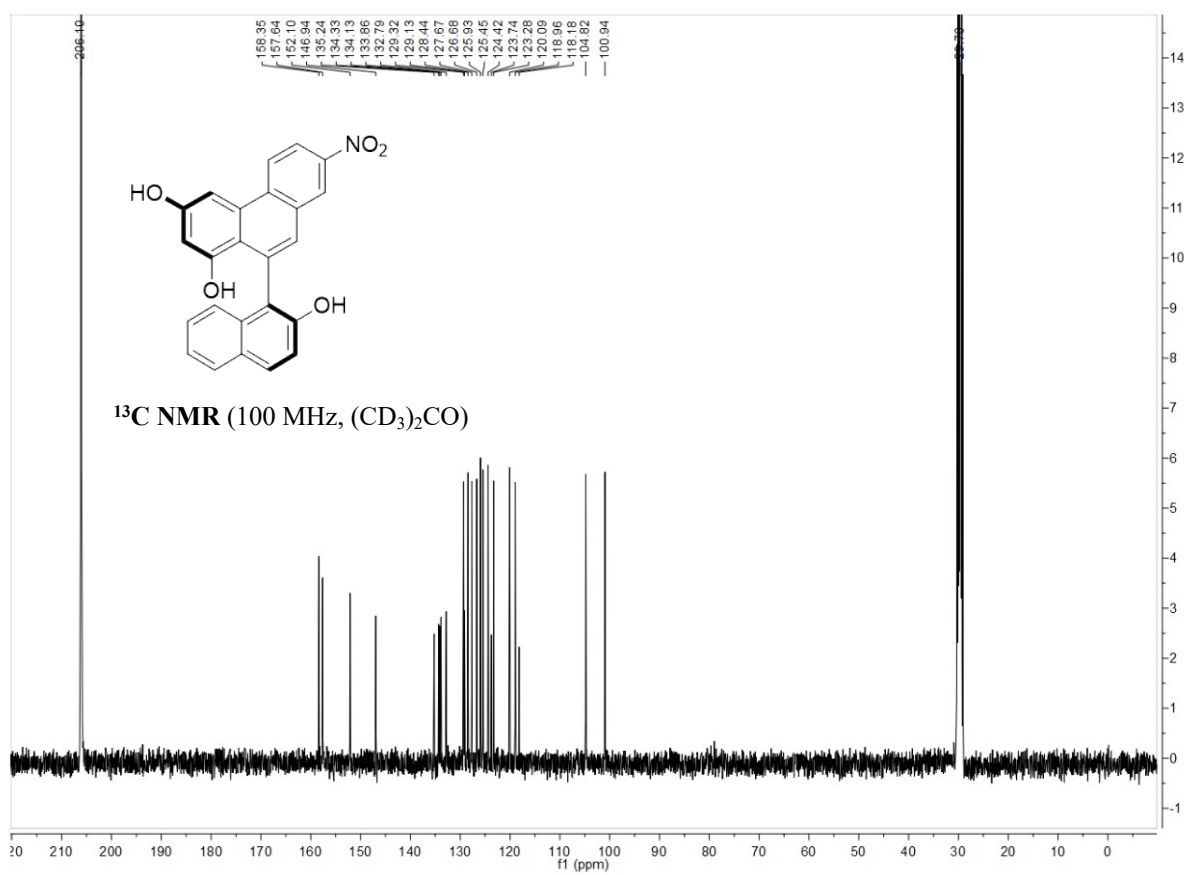



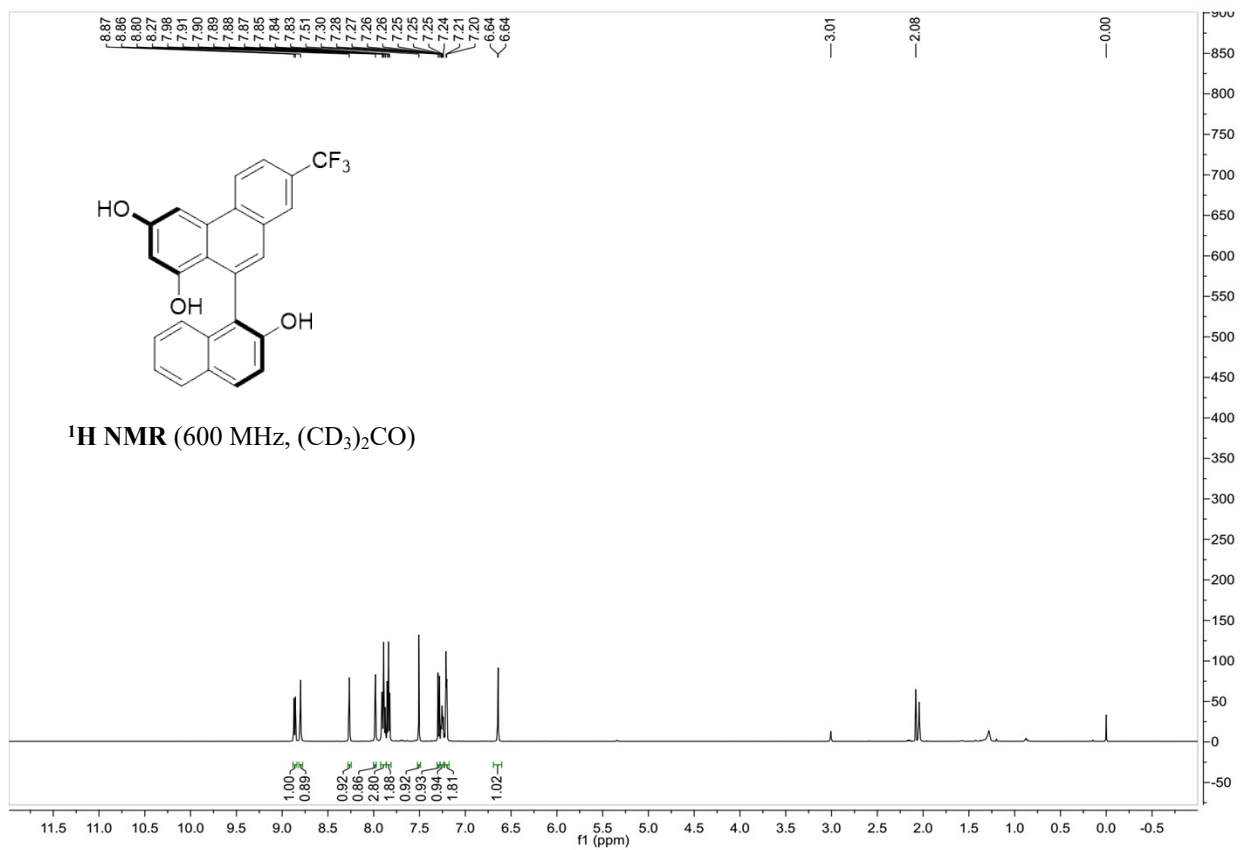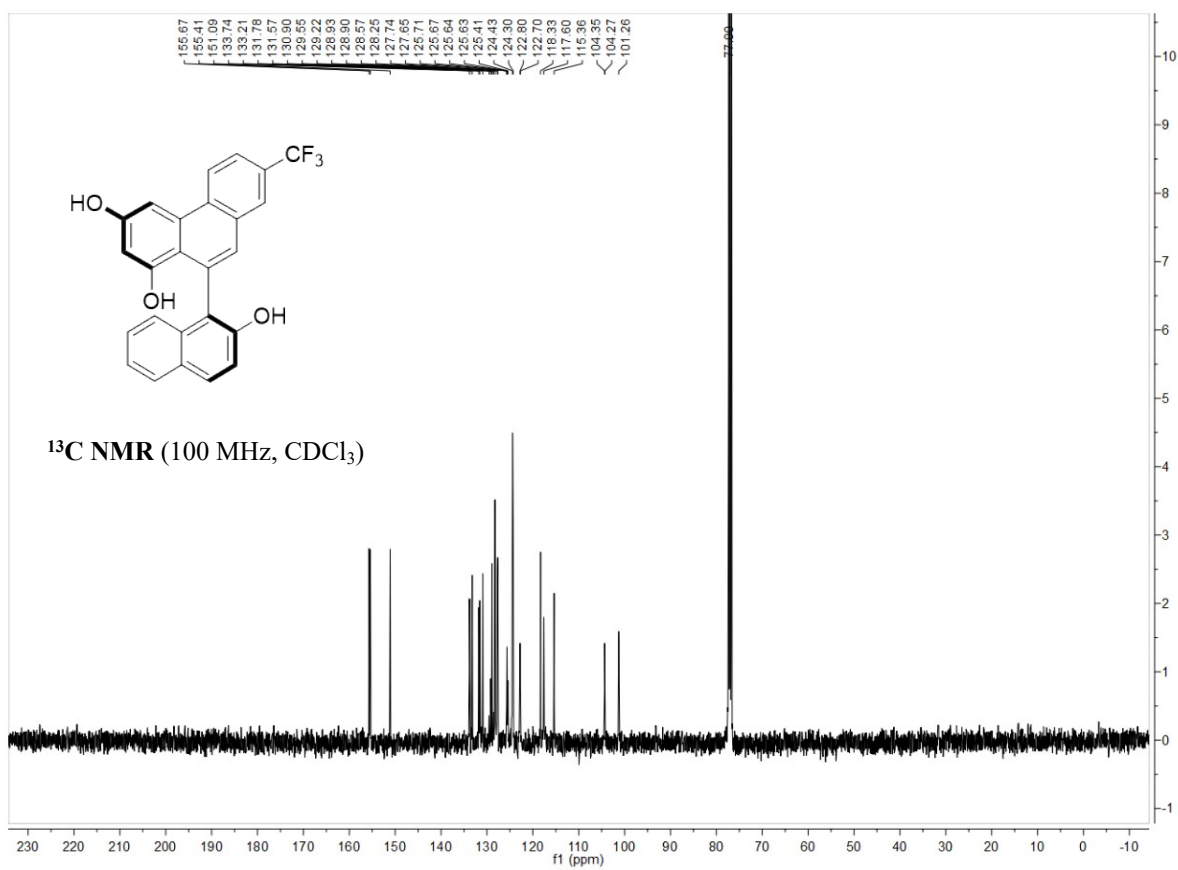

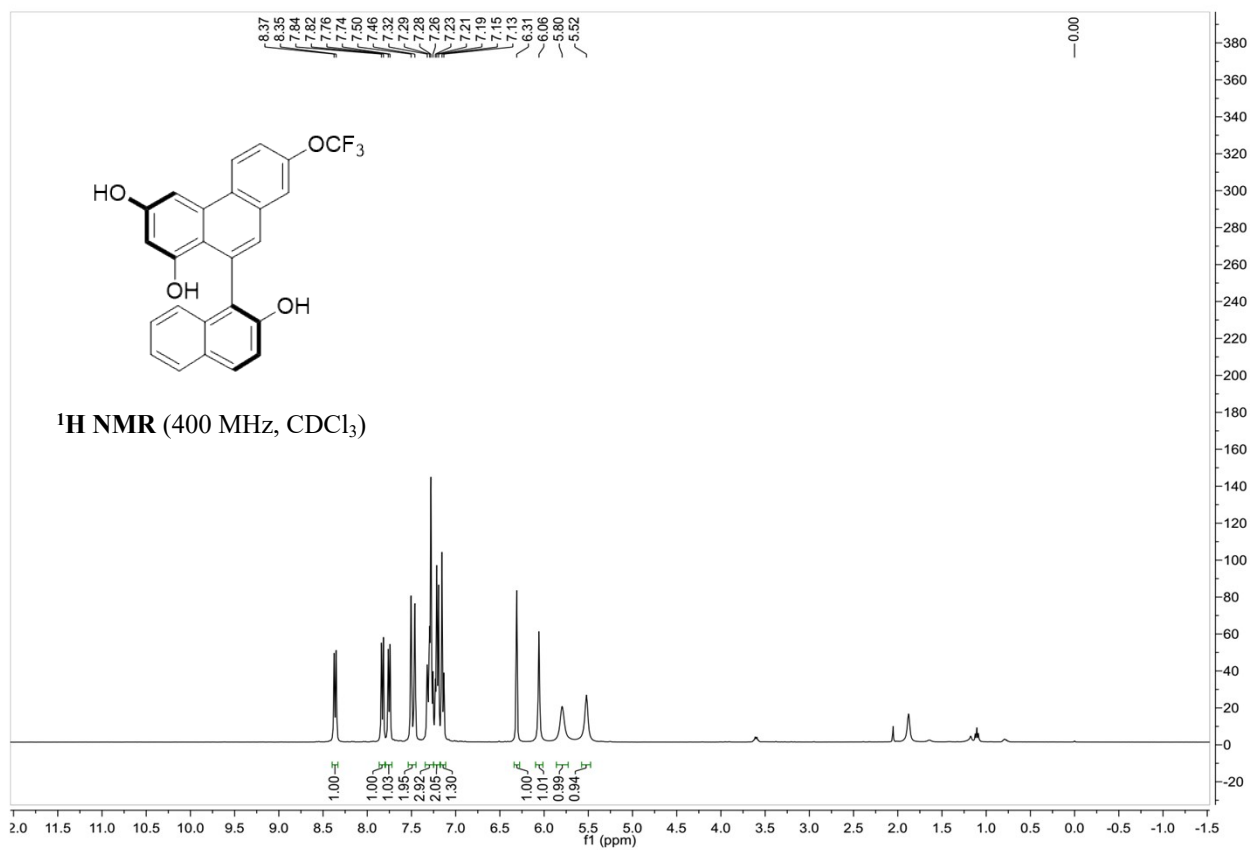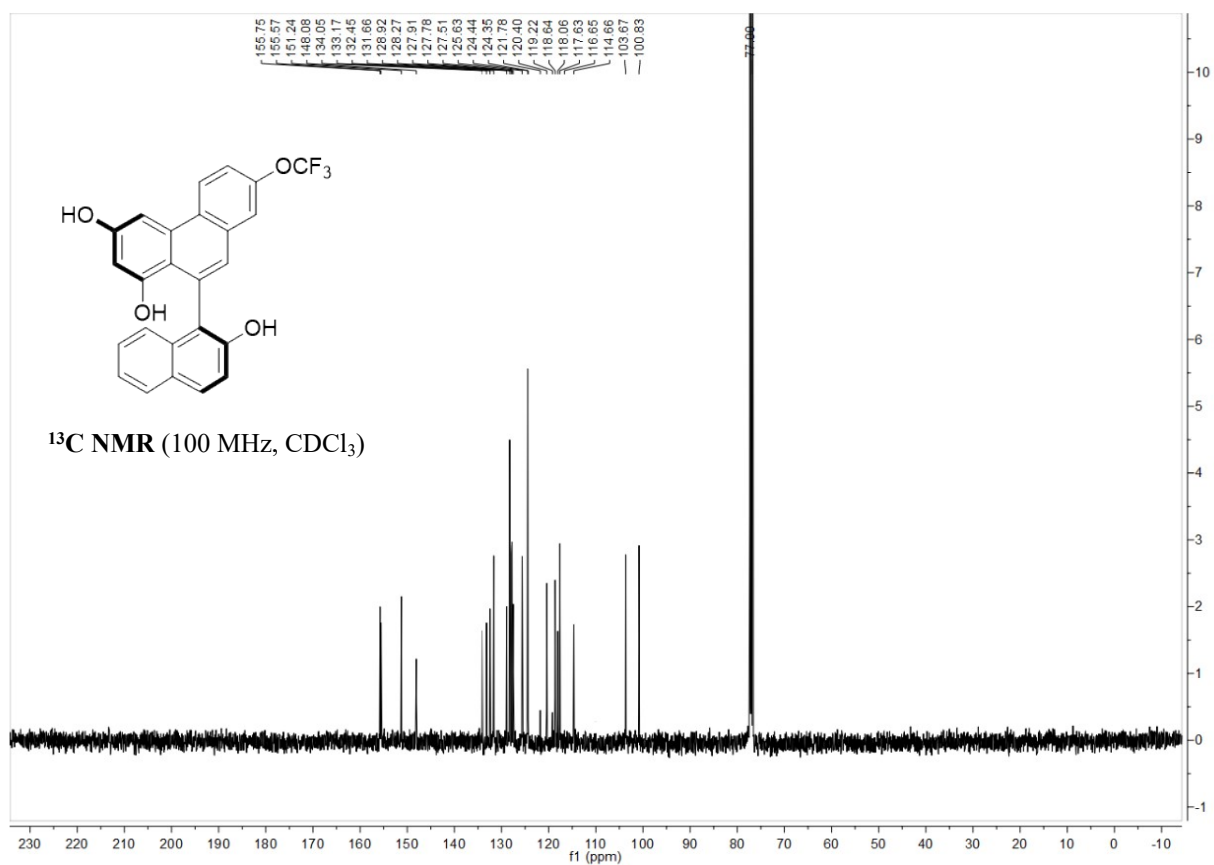

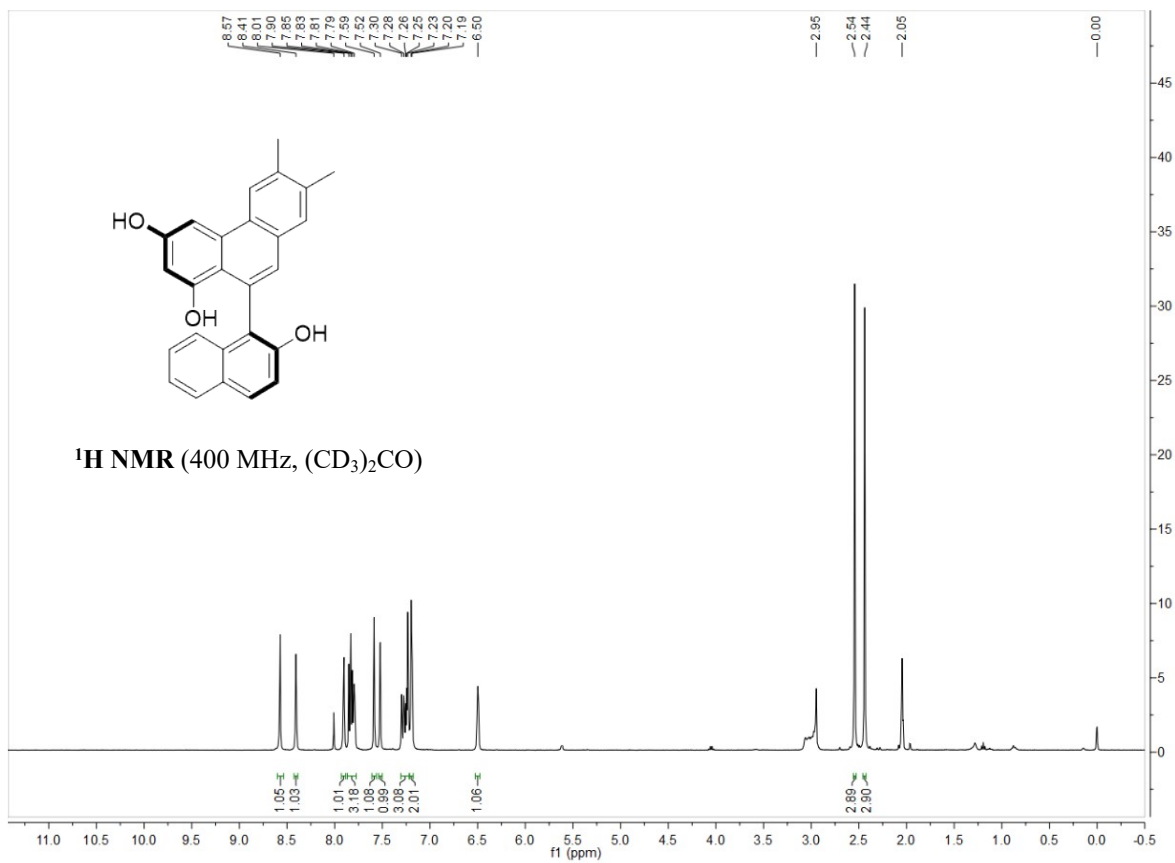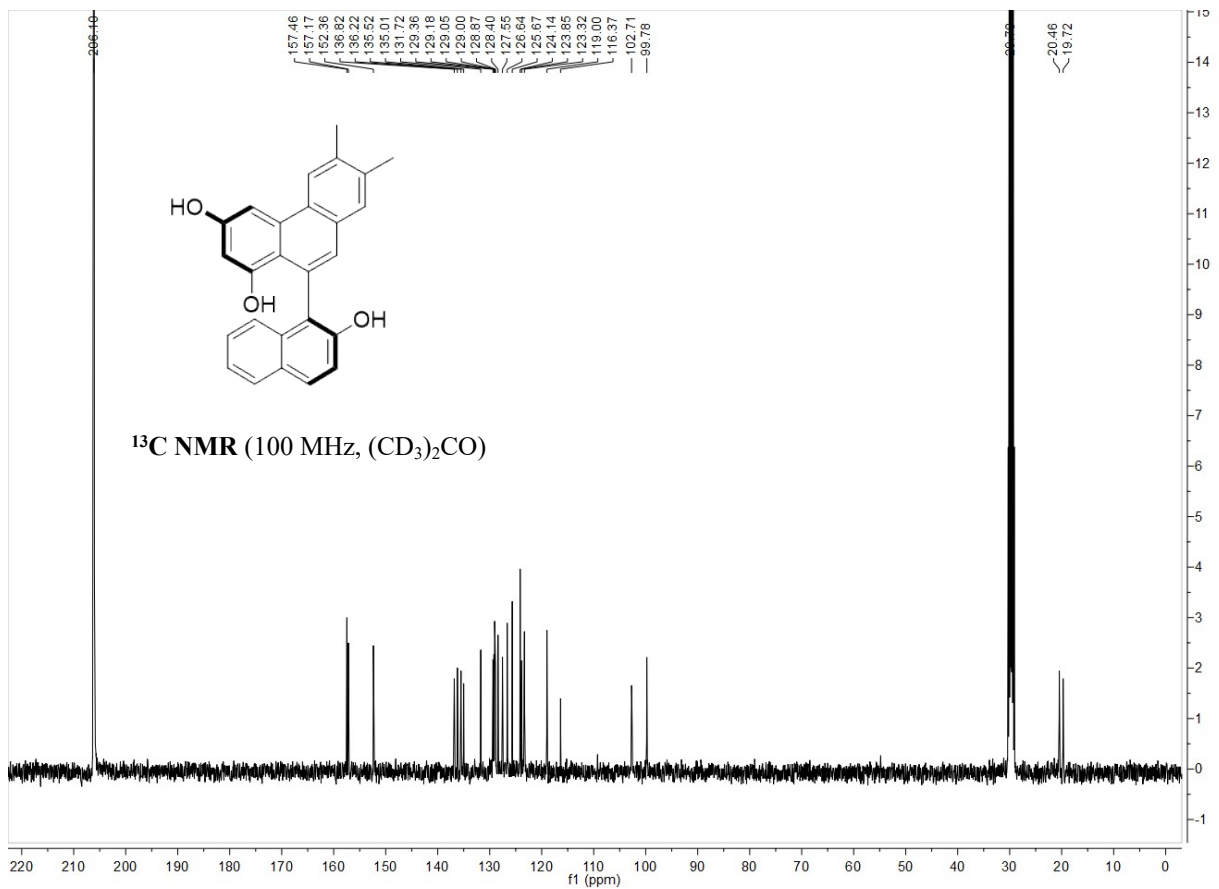

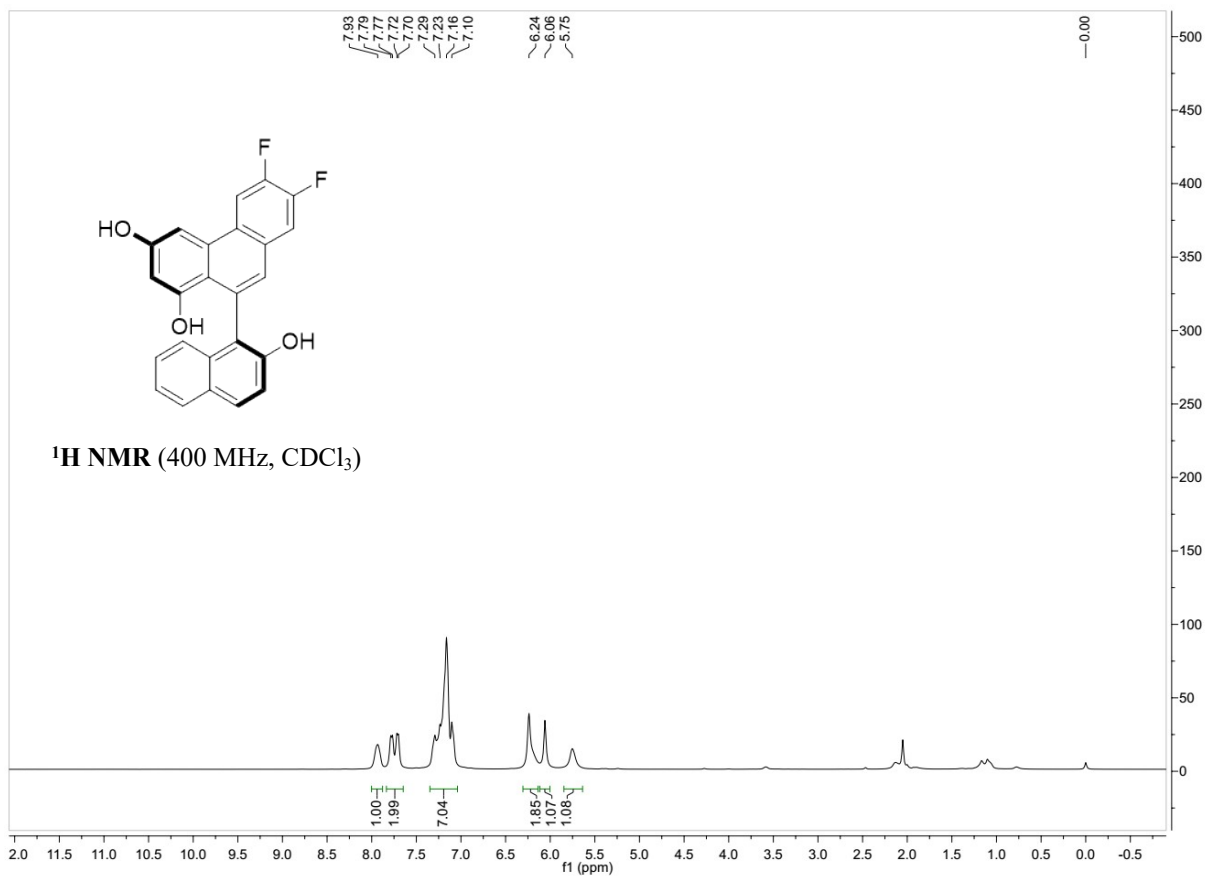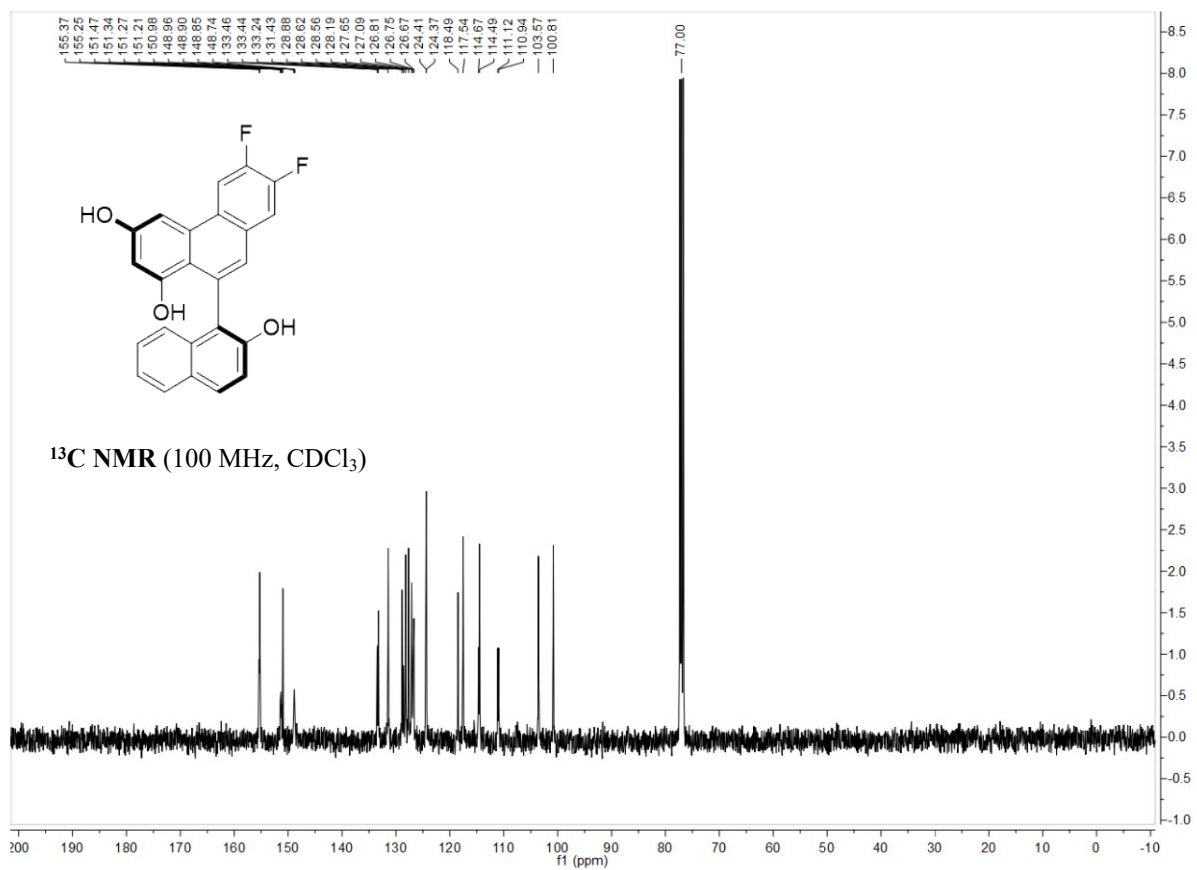

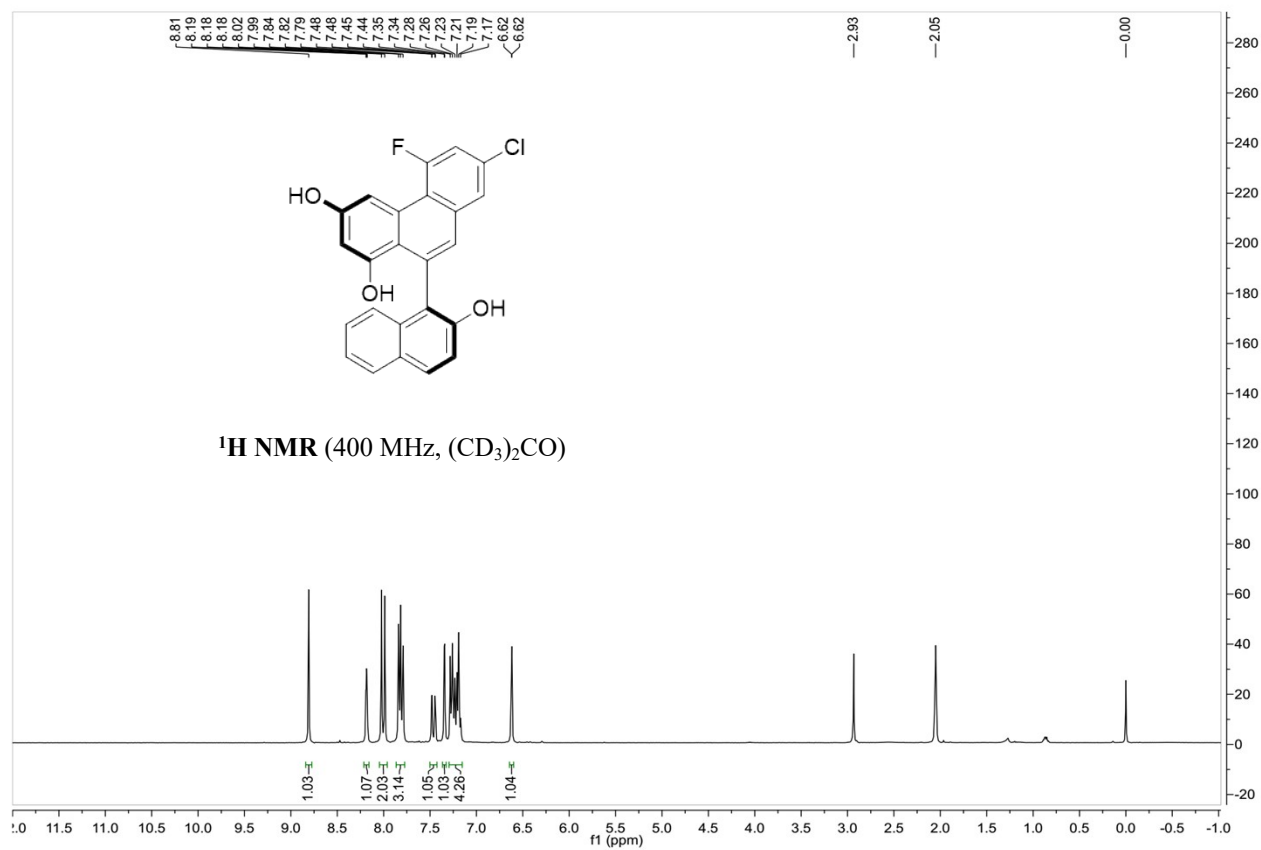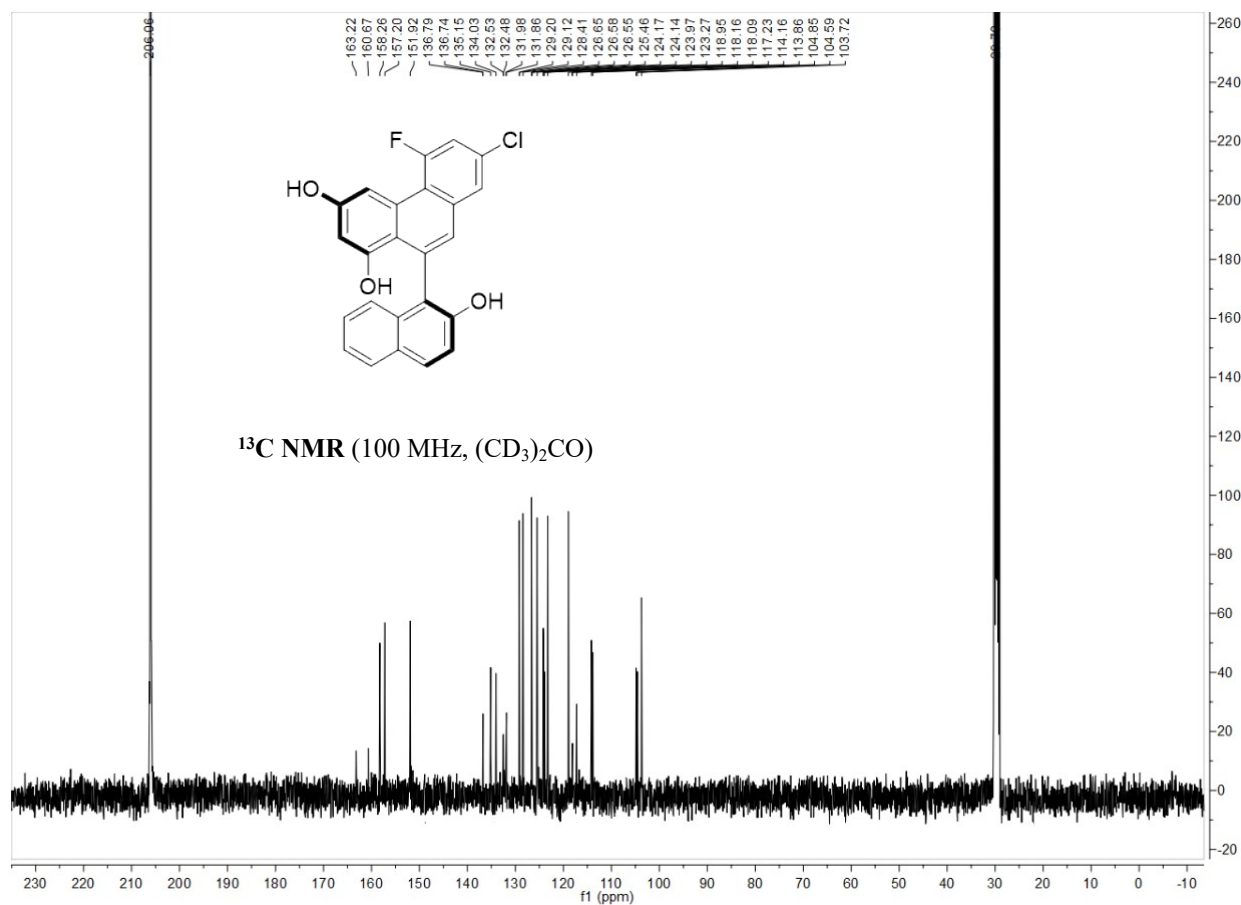

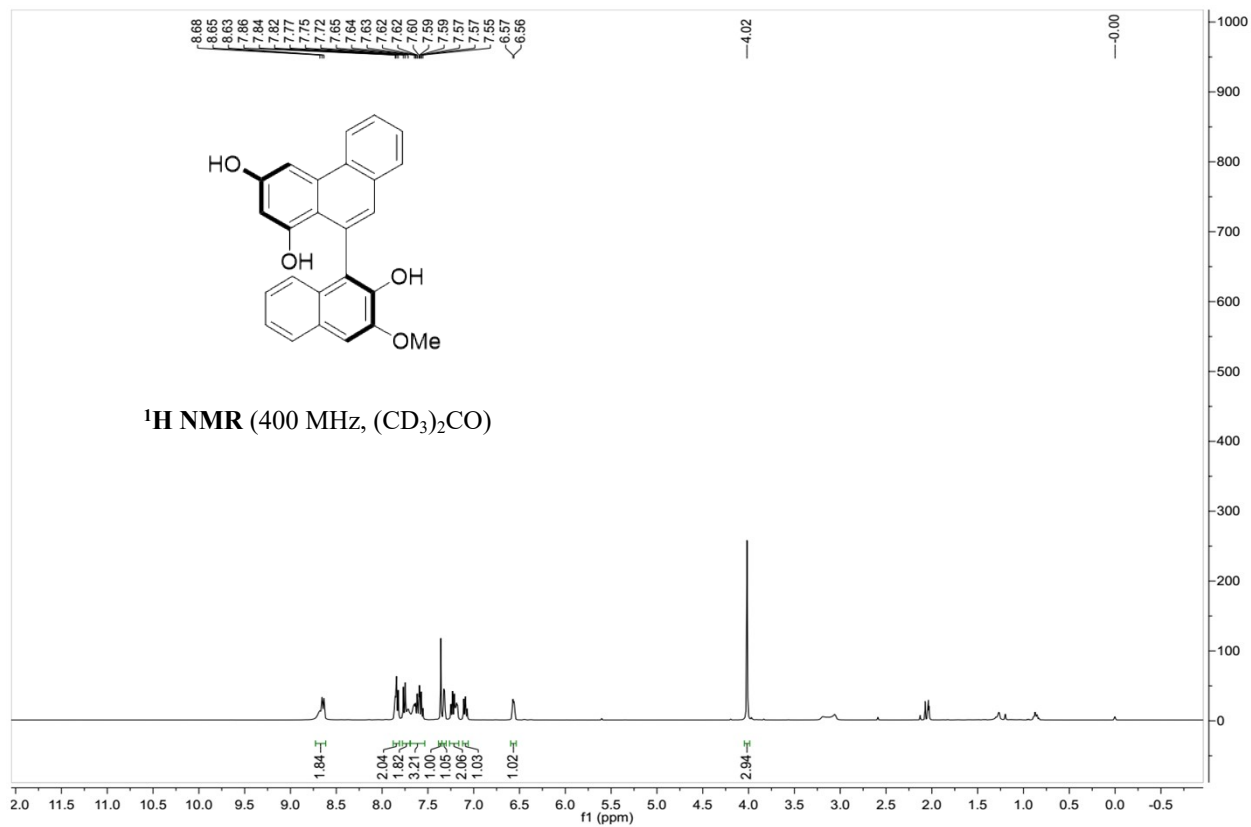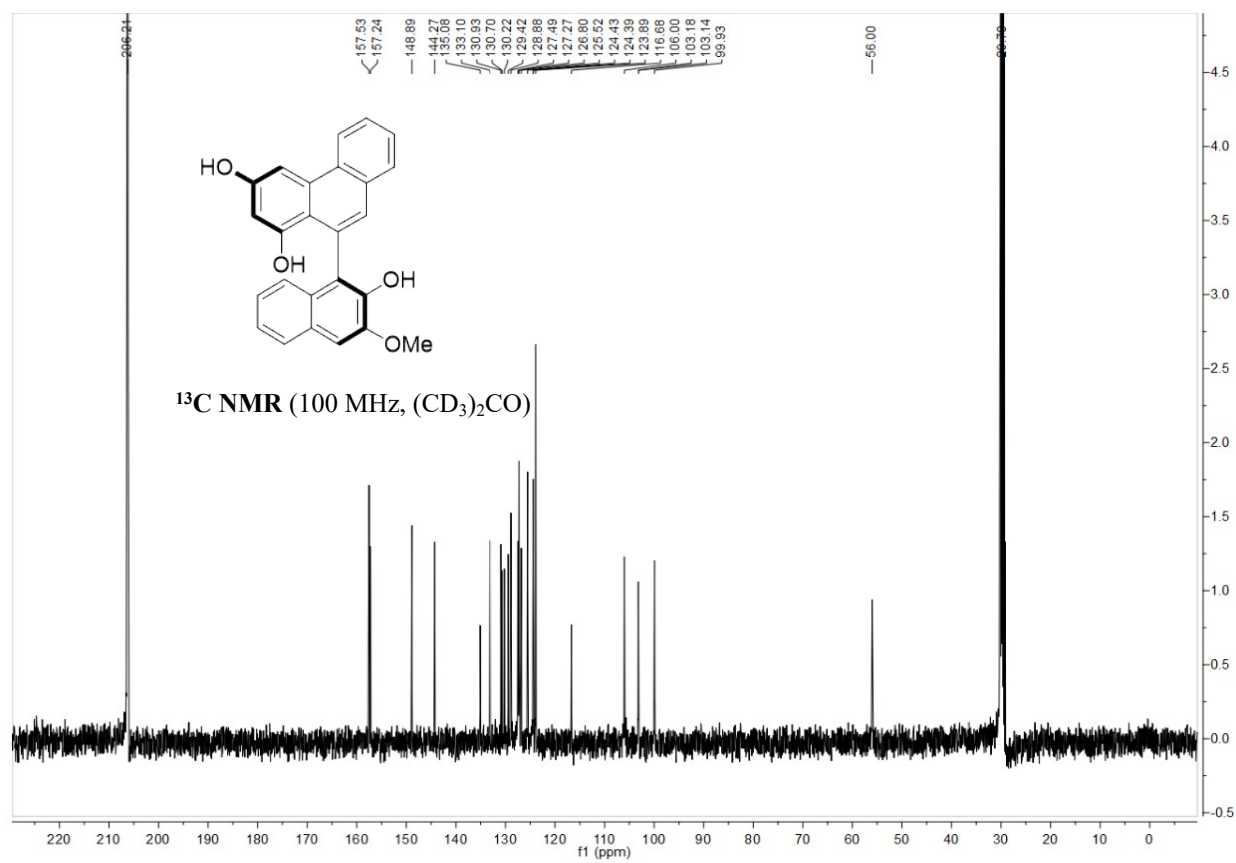

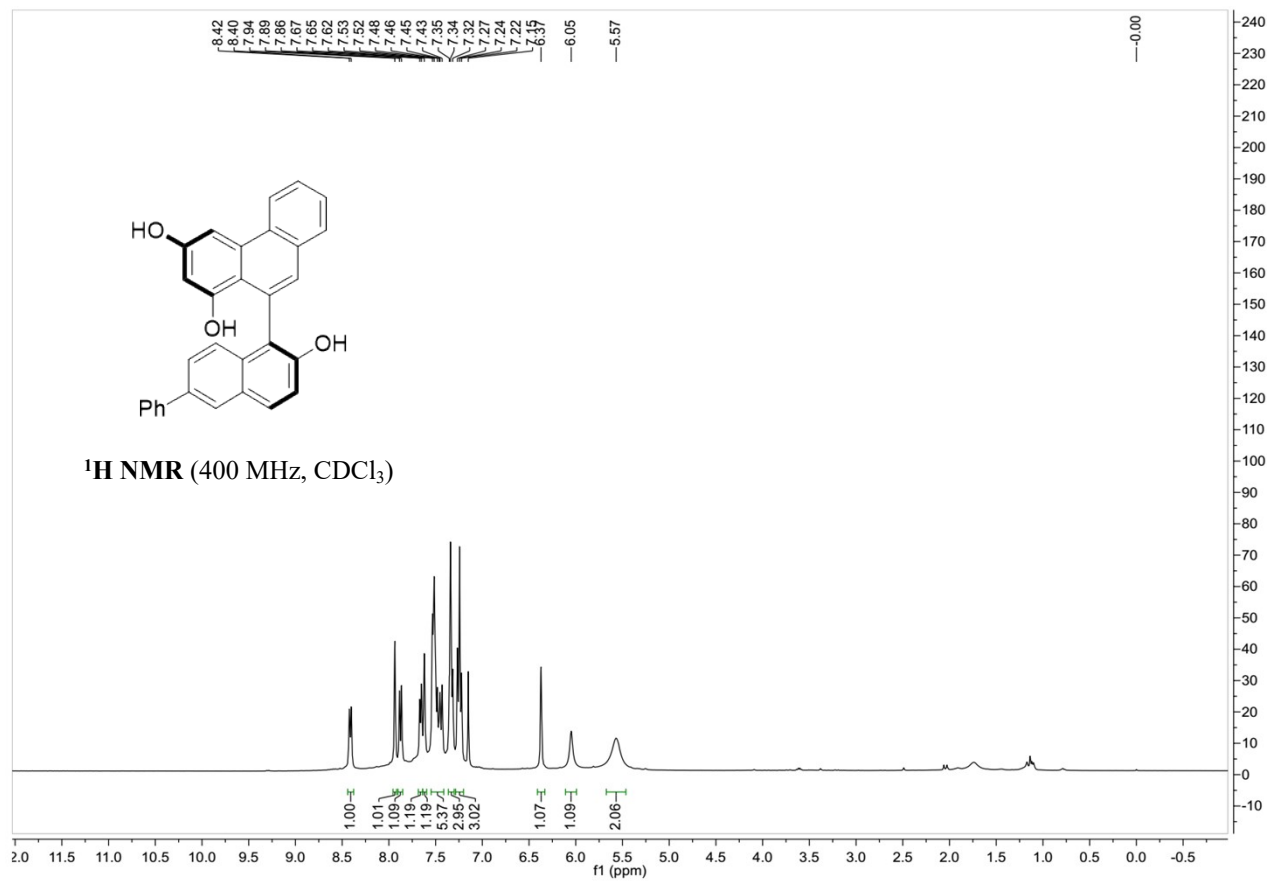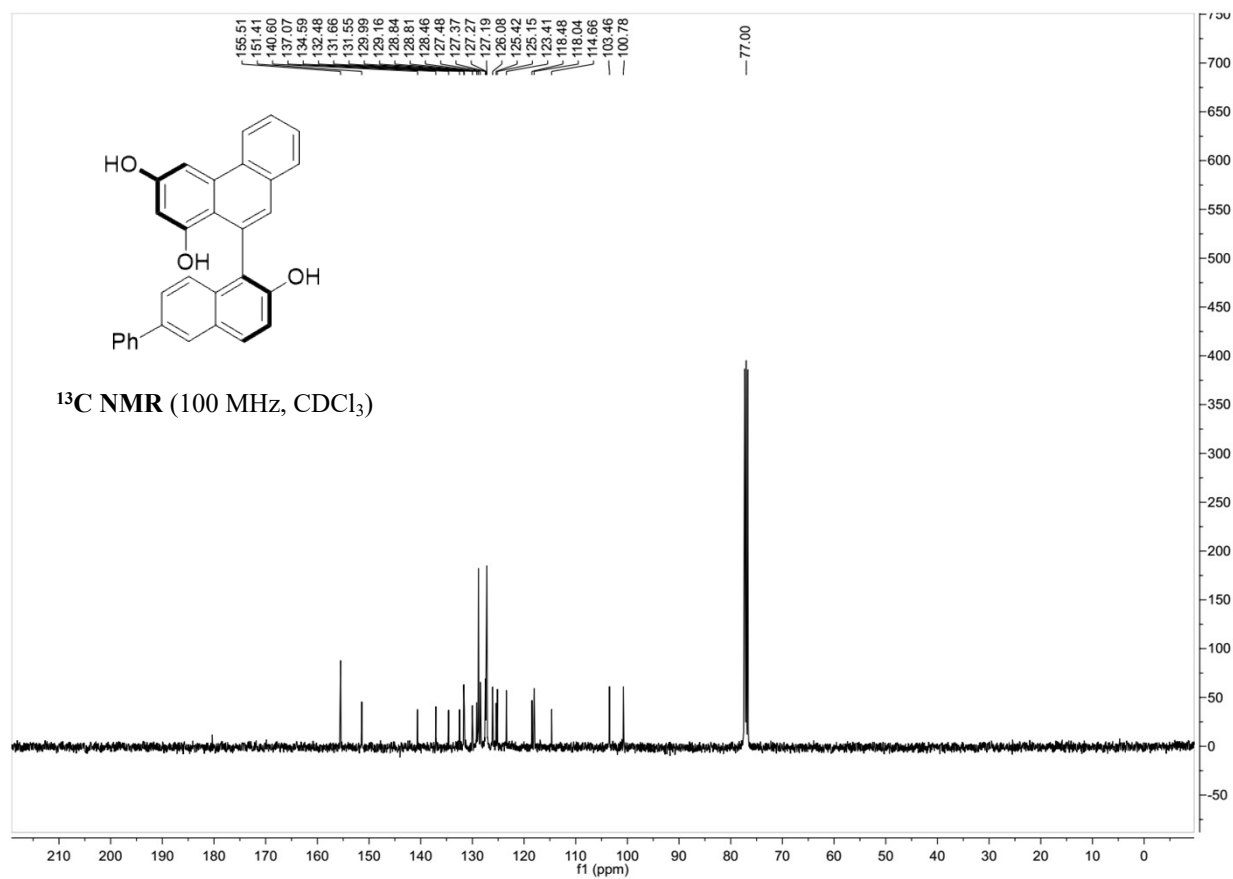

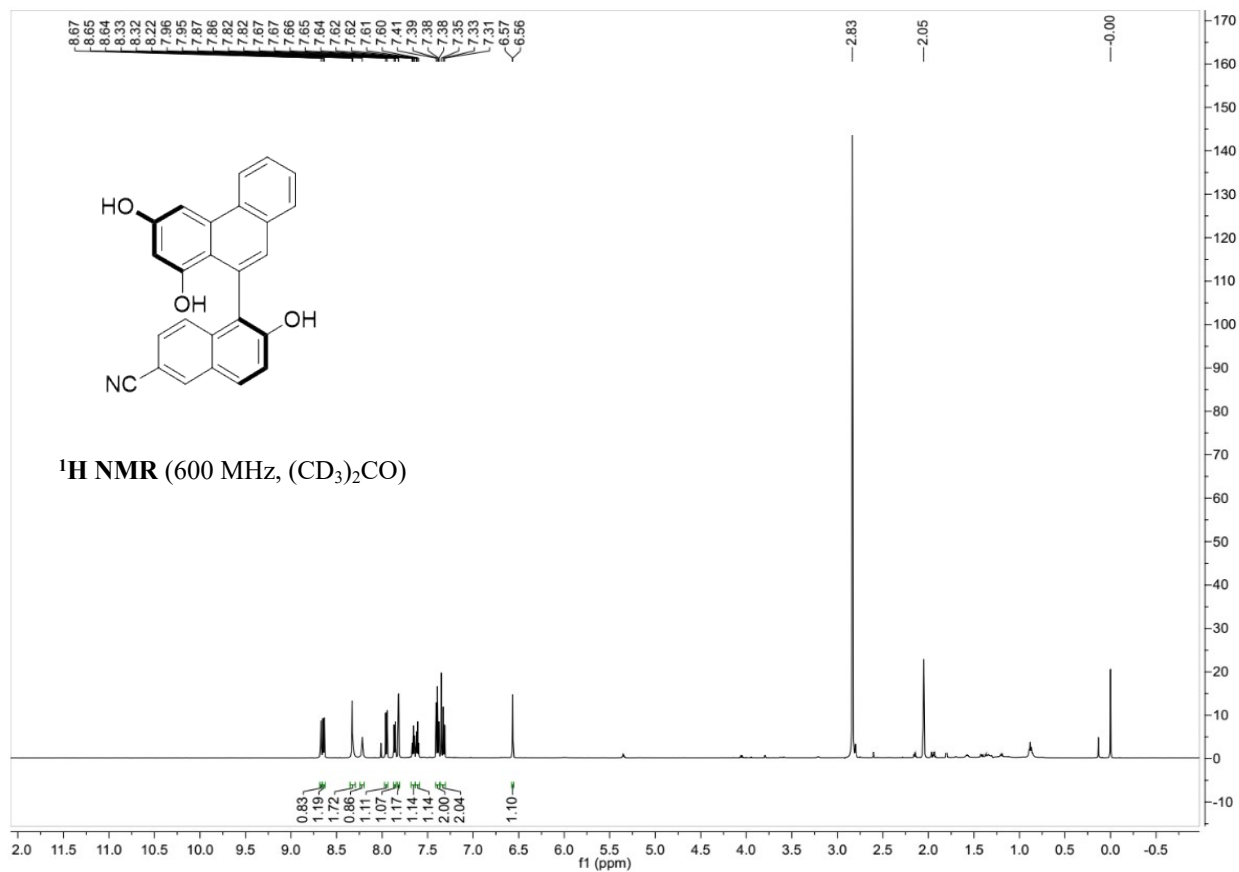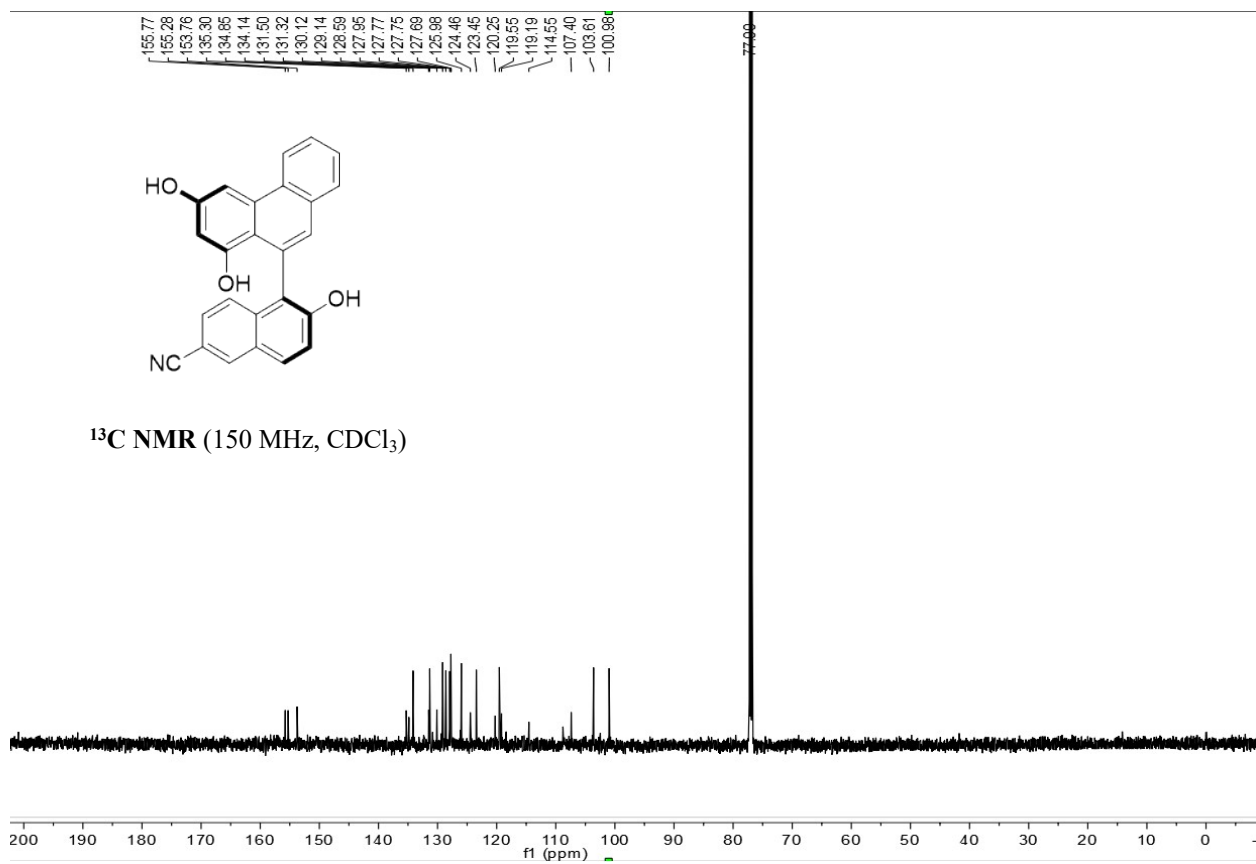



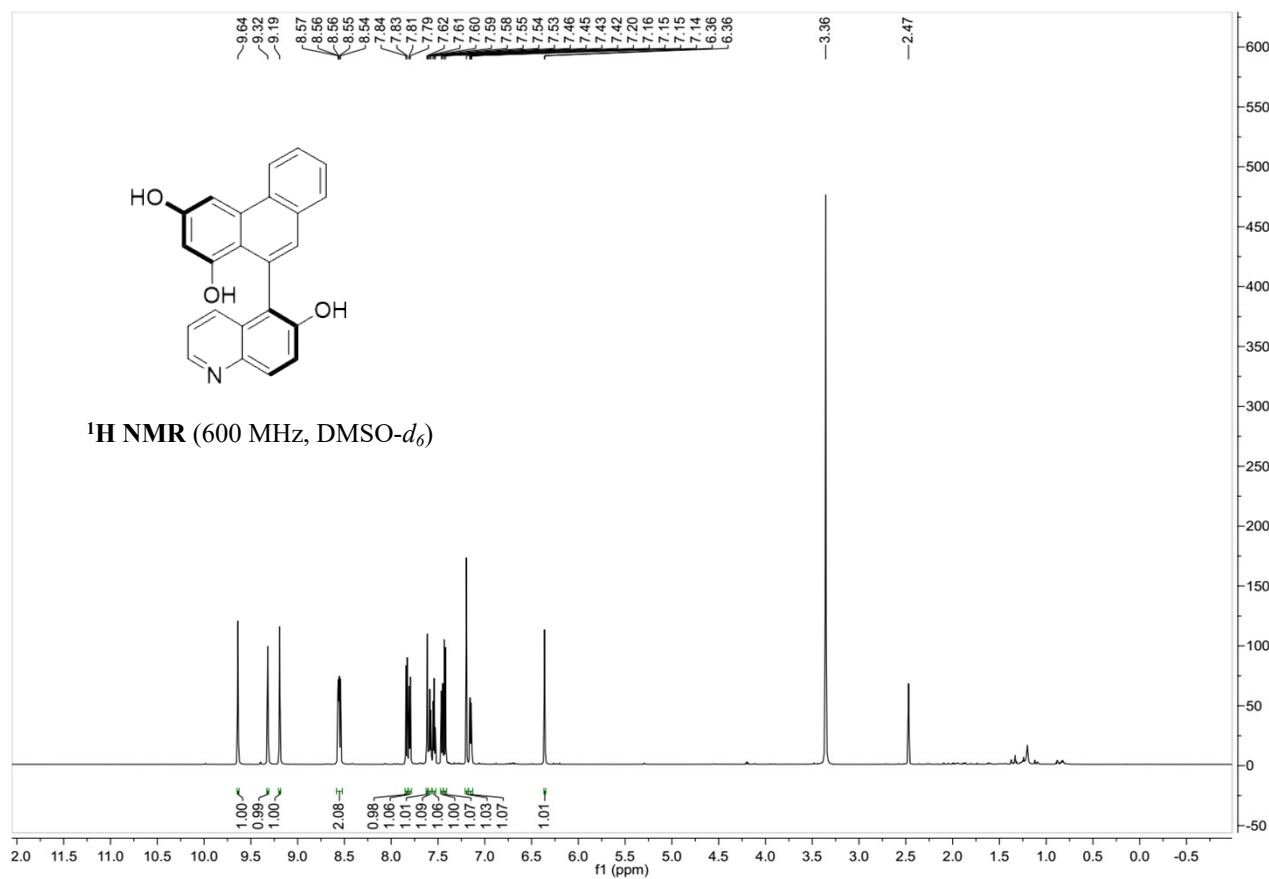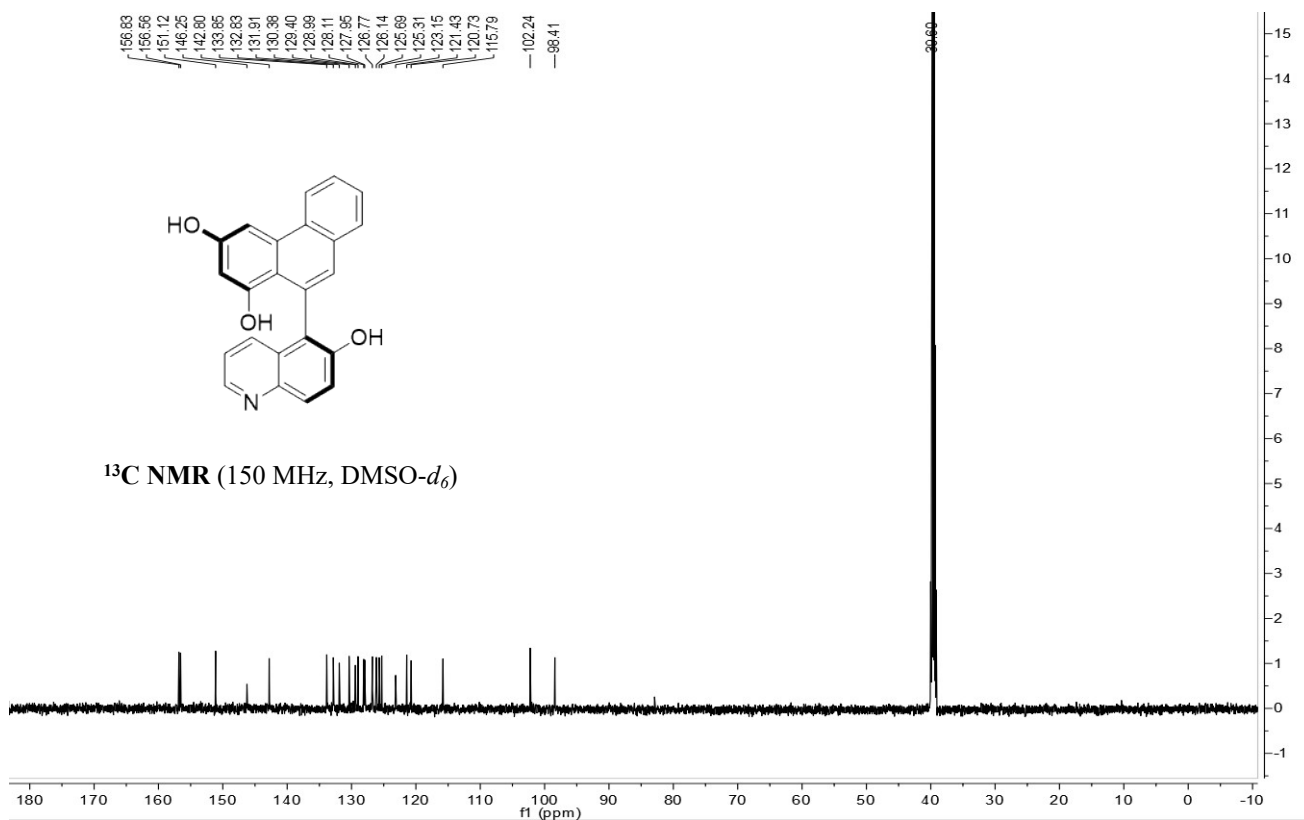

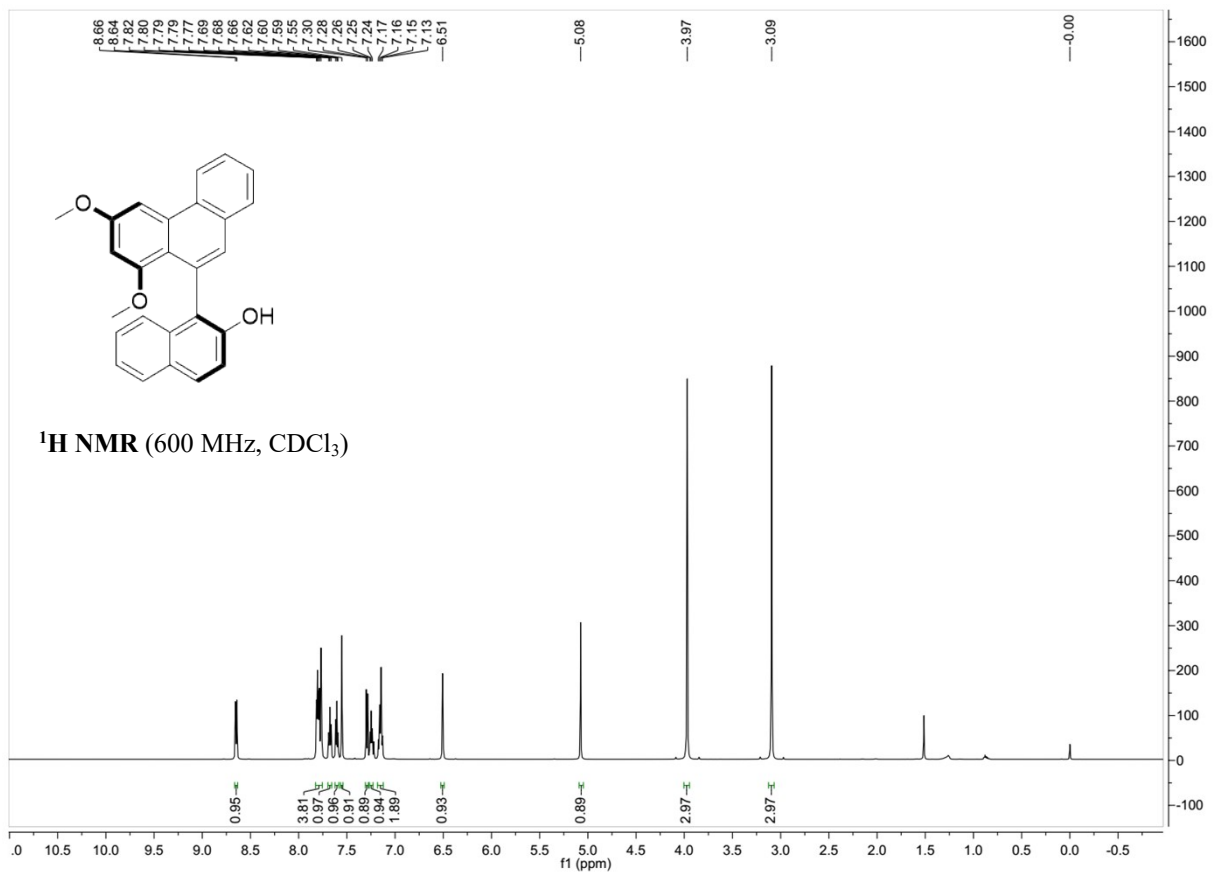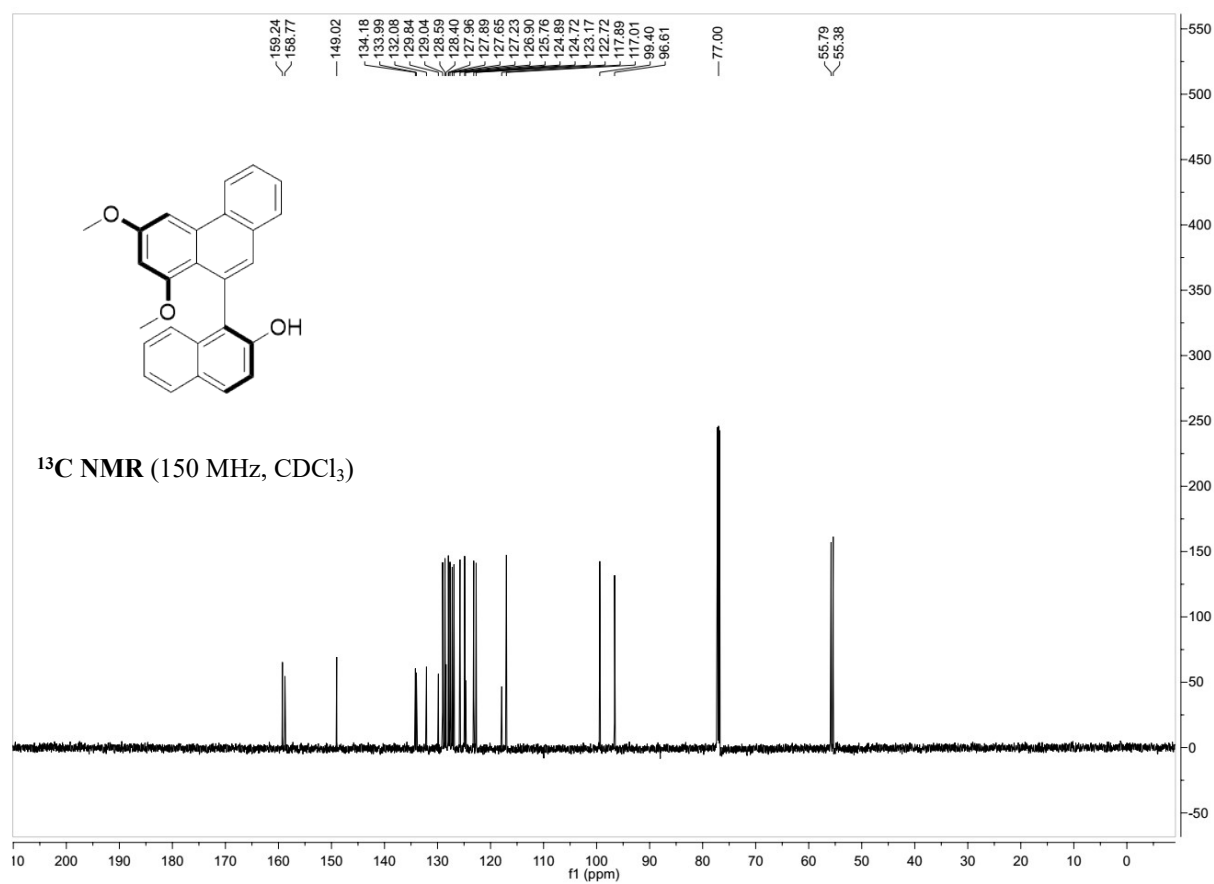

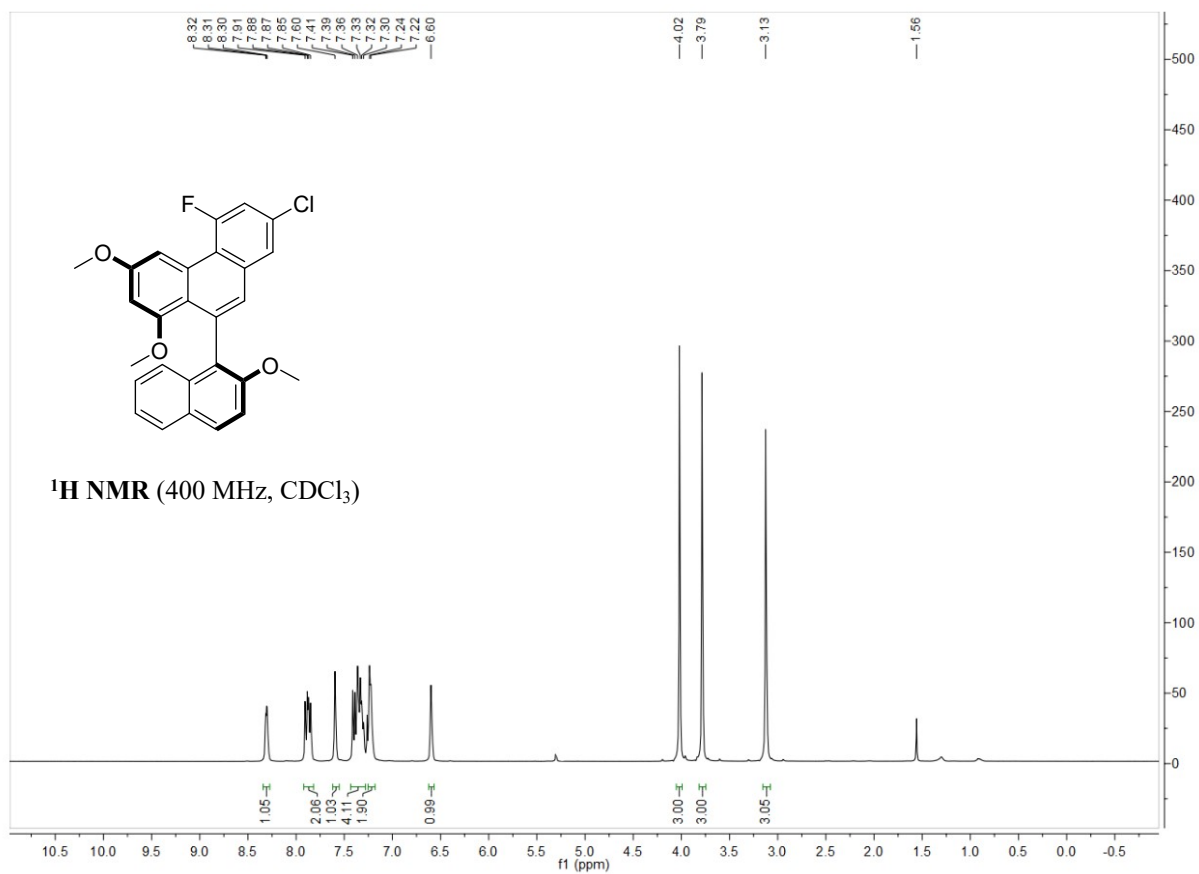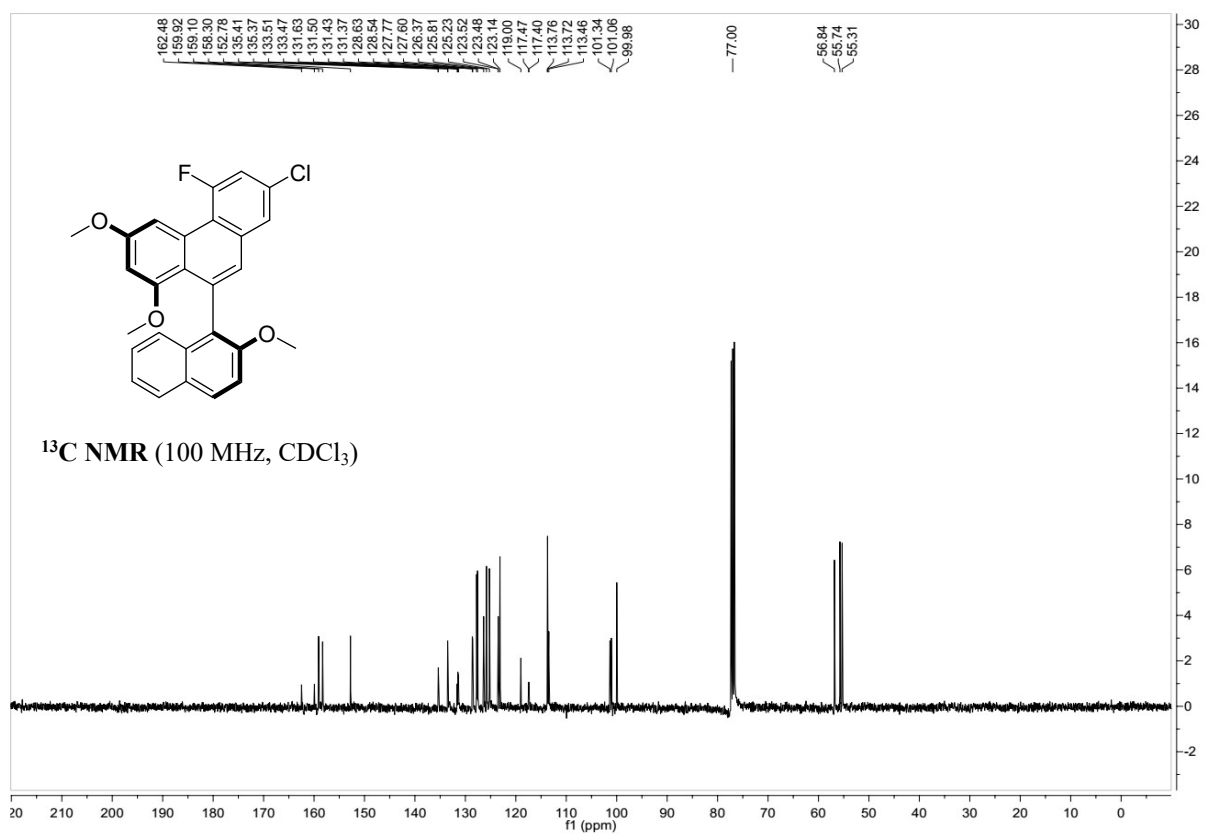

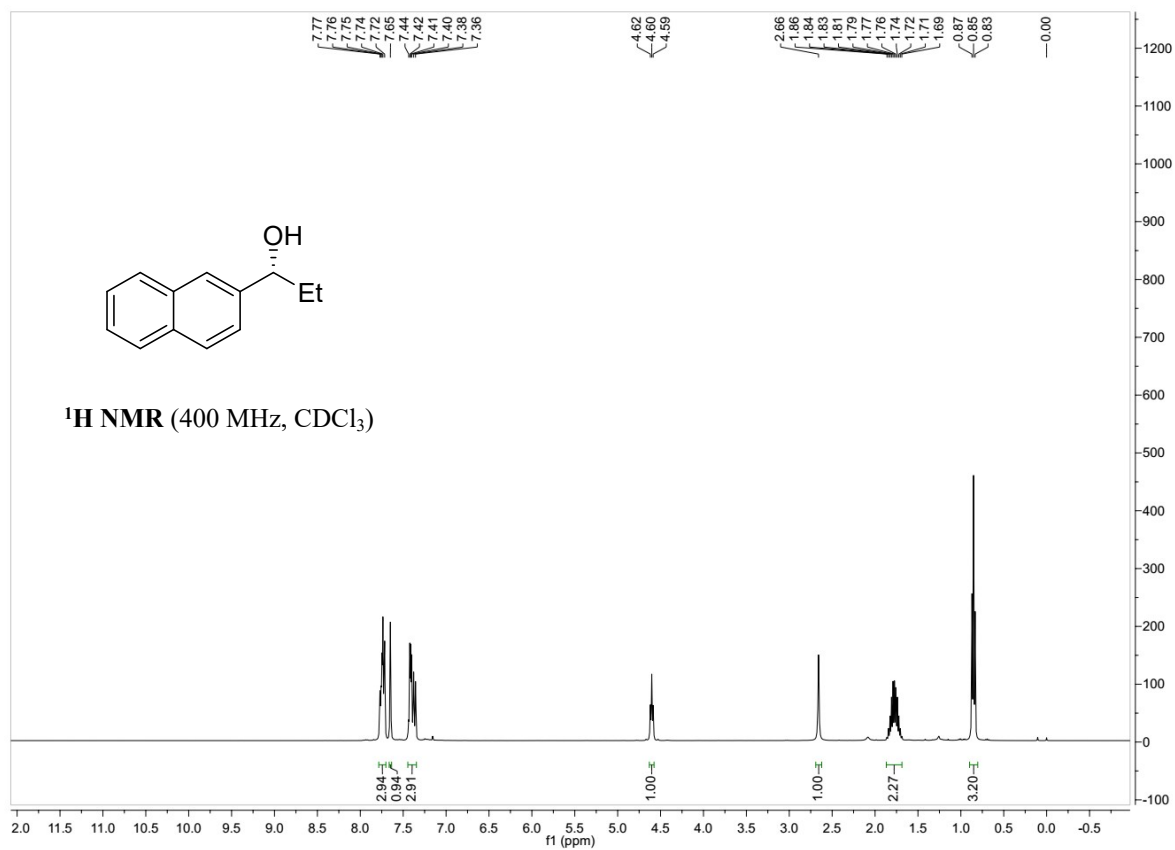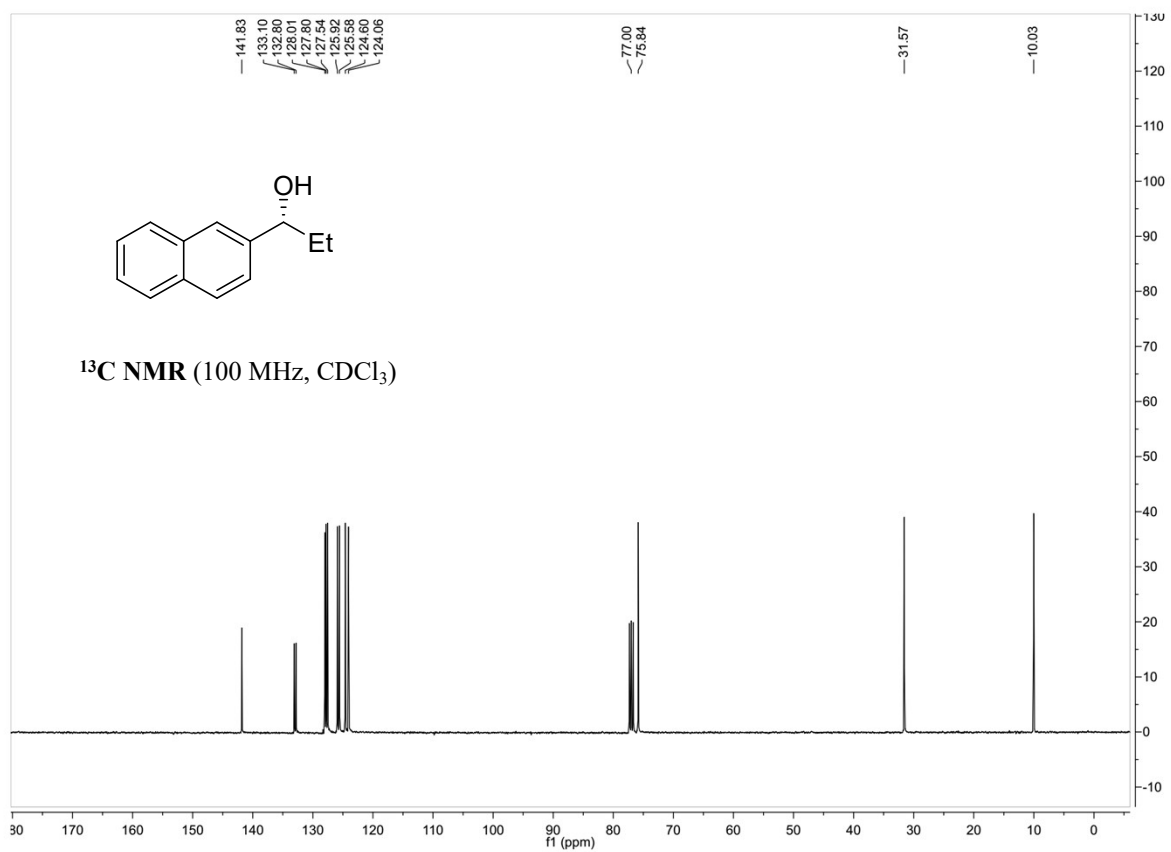

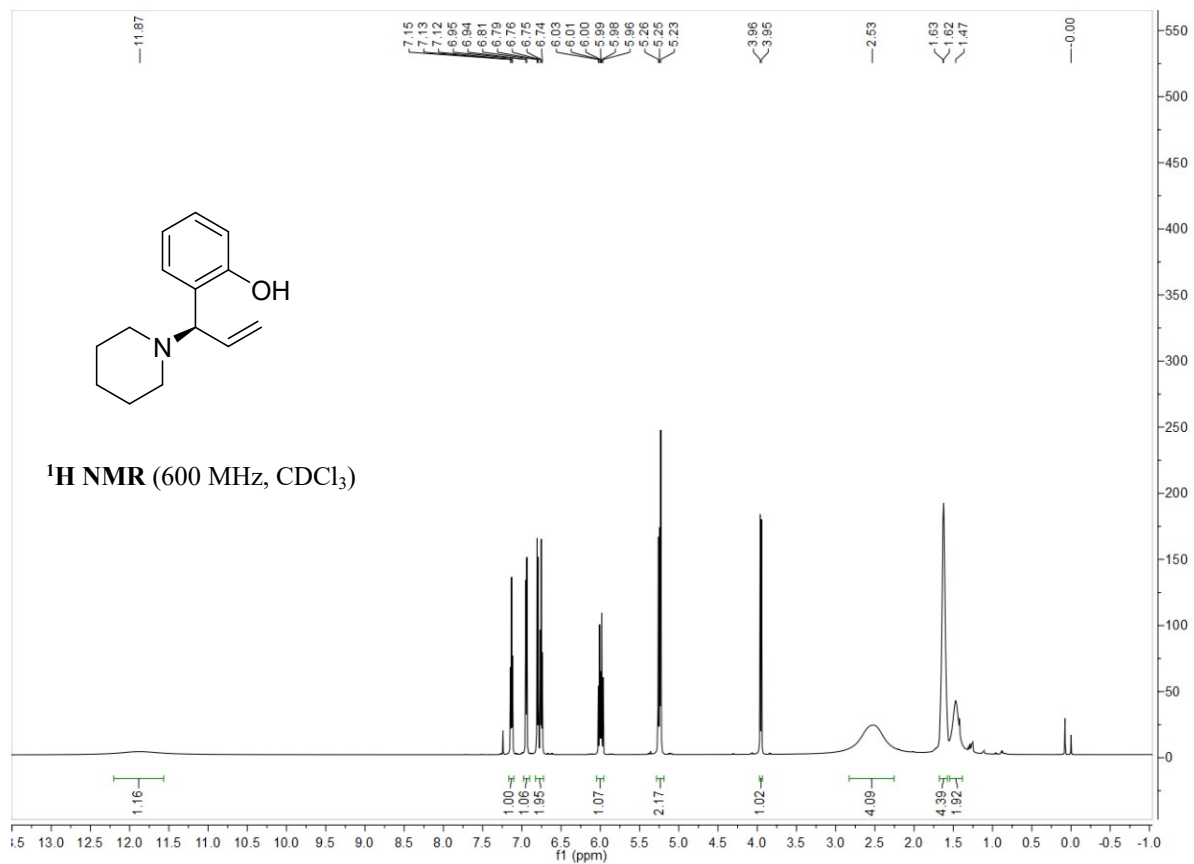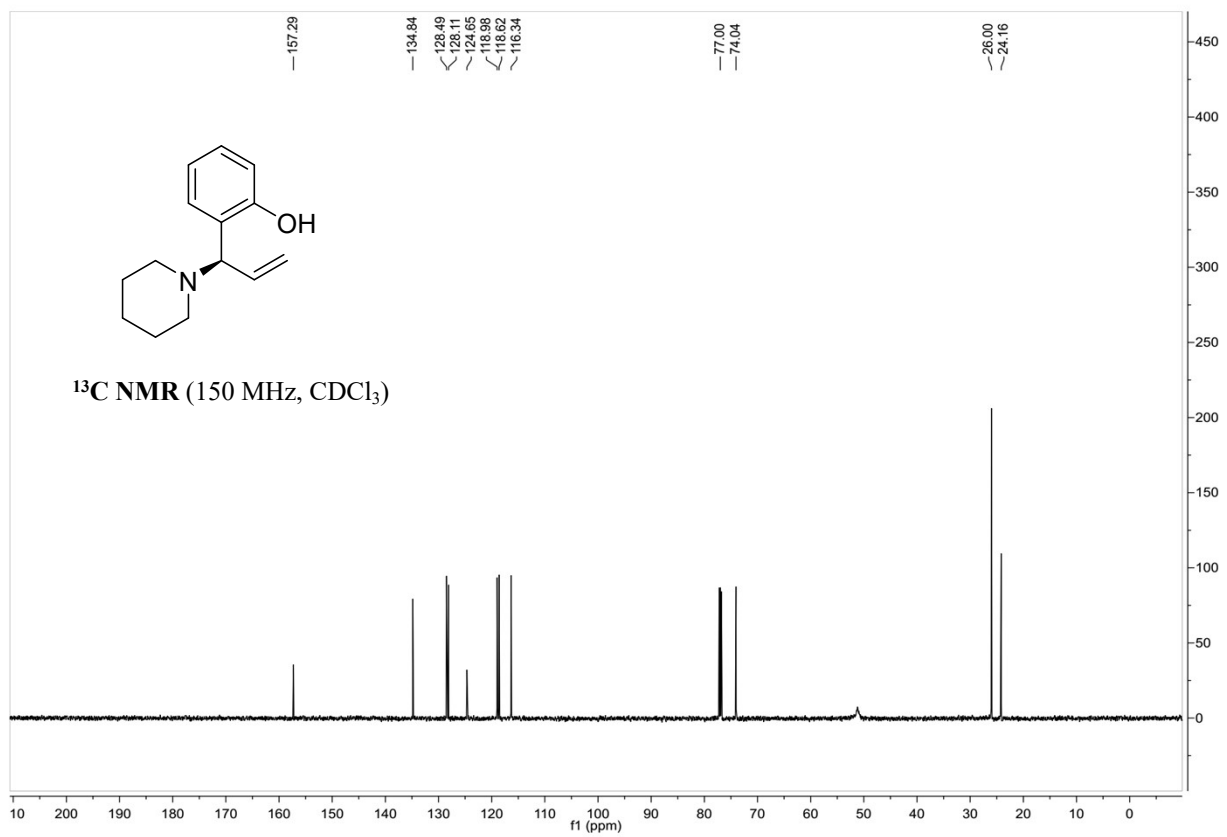

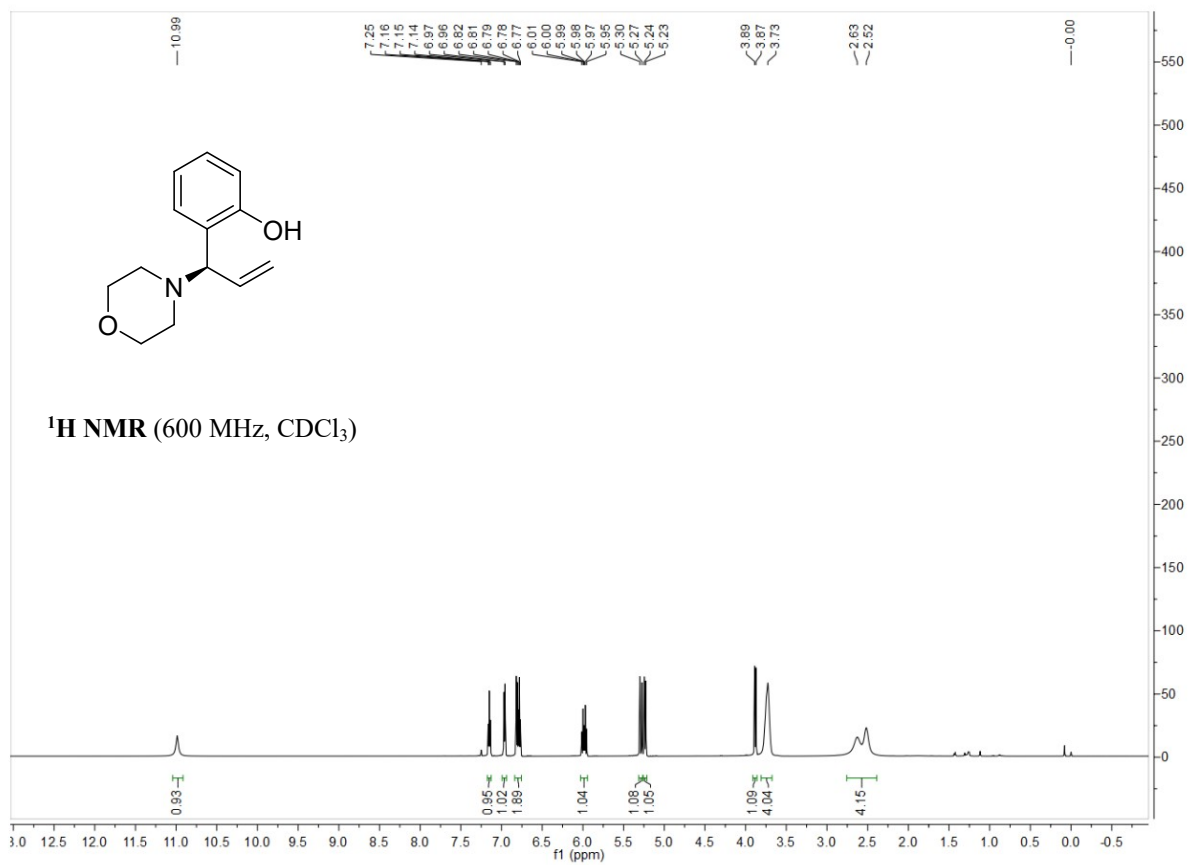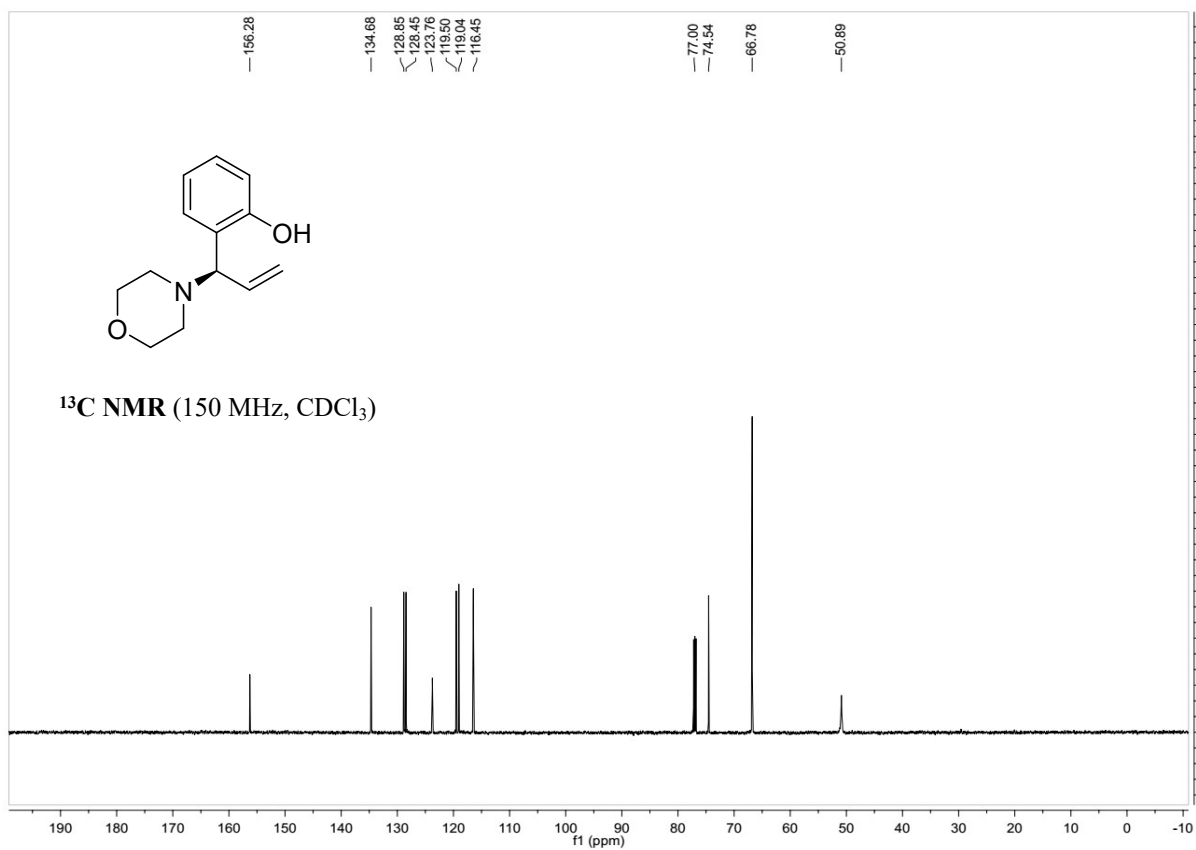

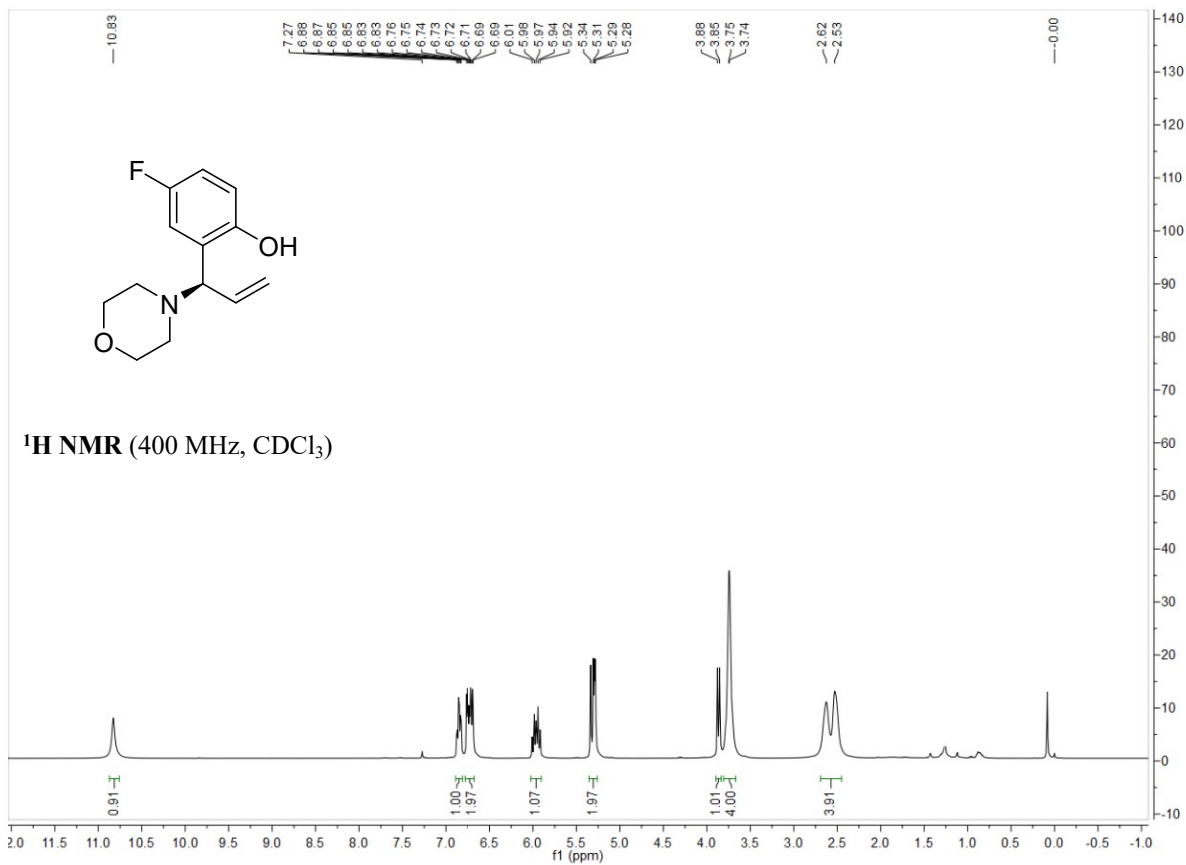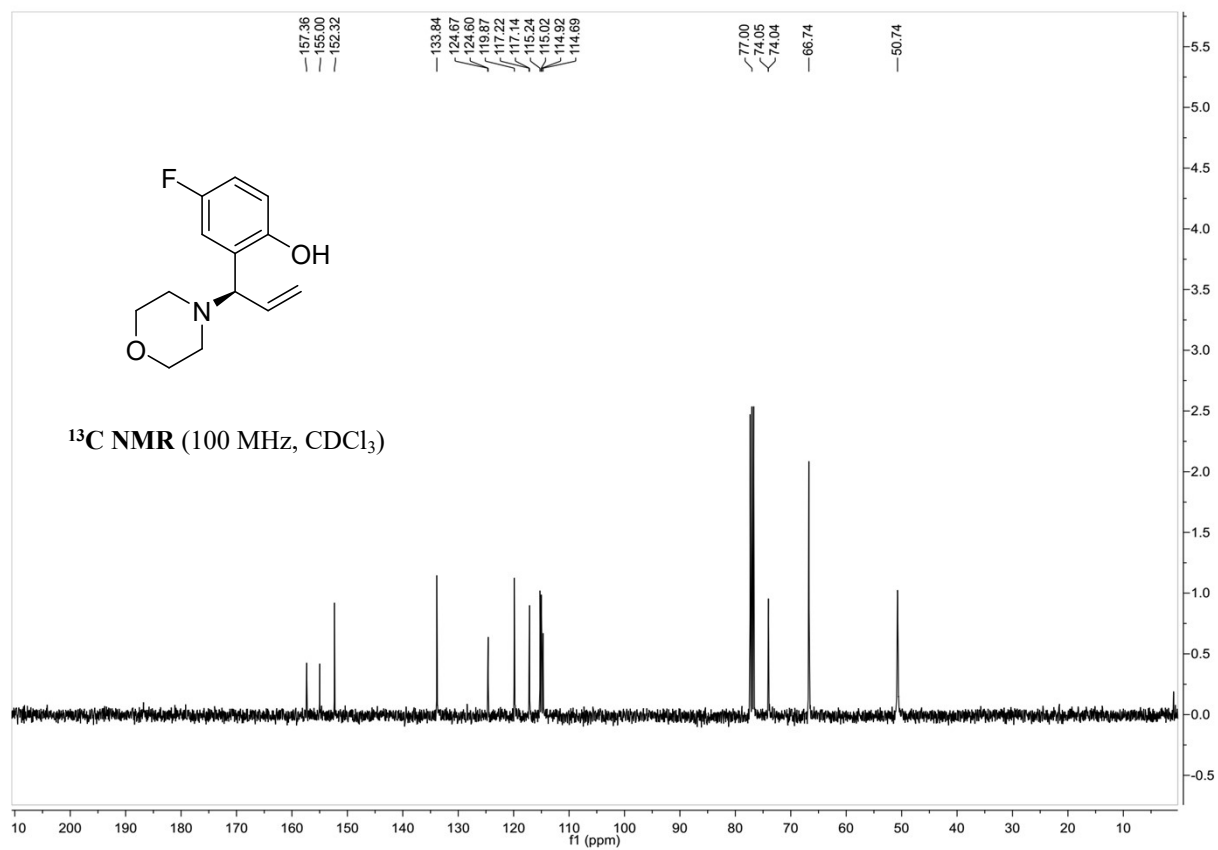

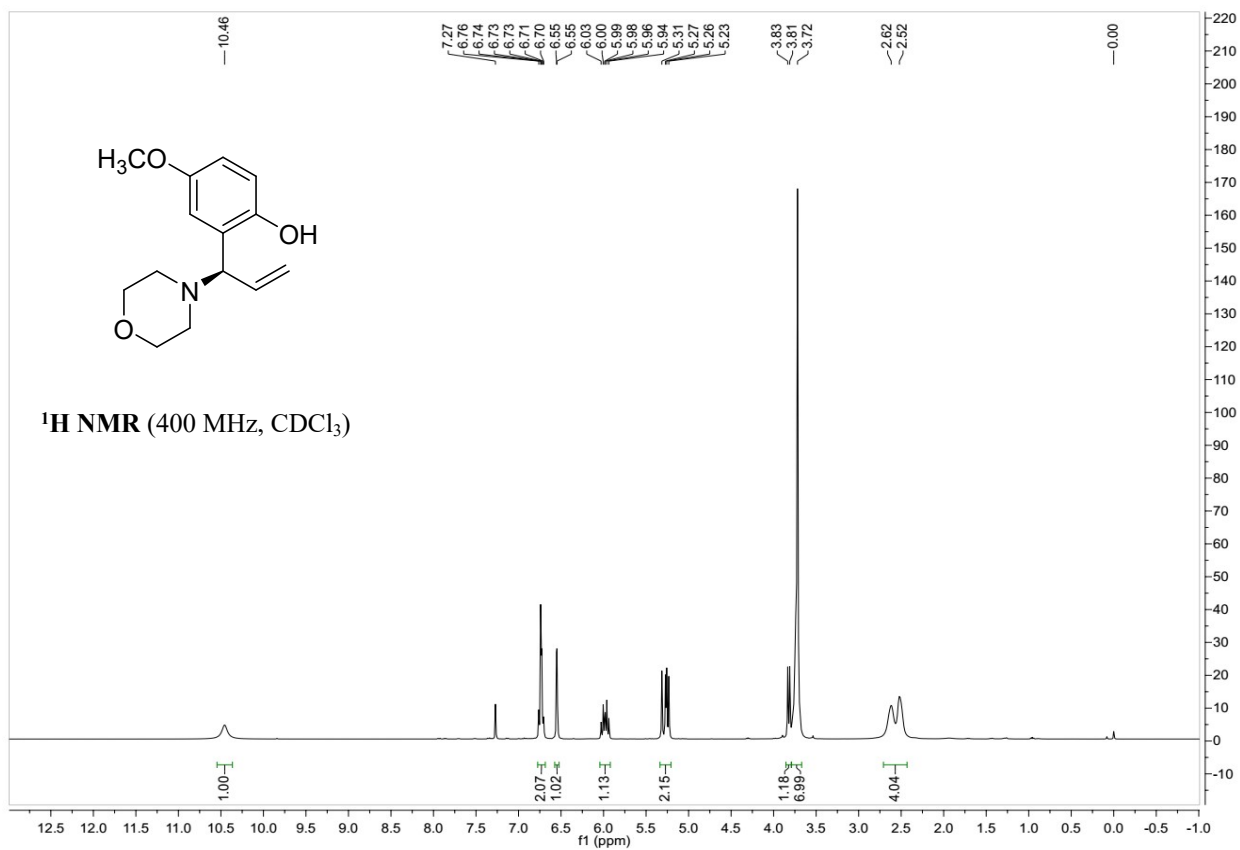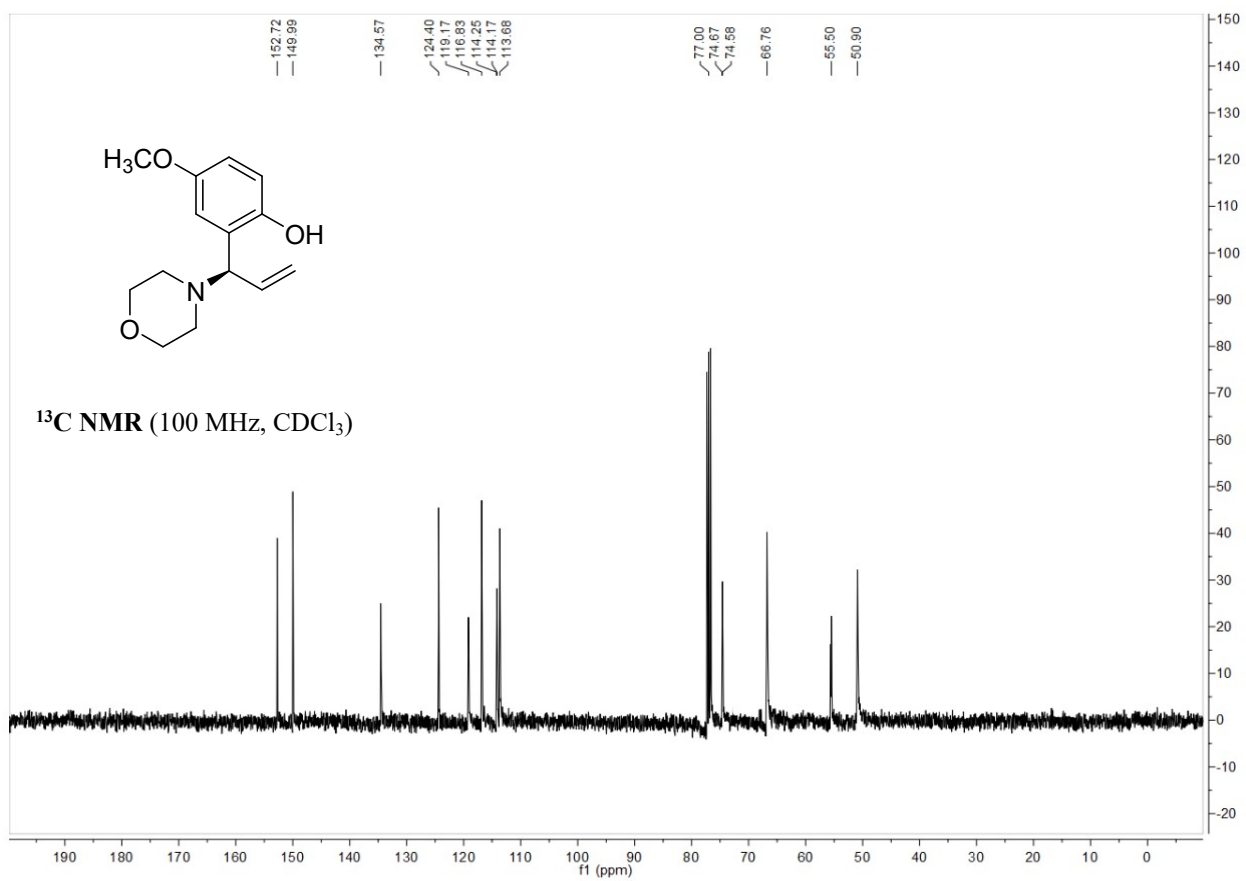



## XII. X-Ray crystallographic information of 3a

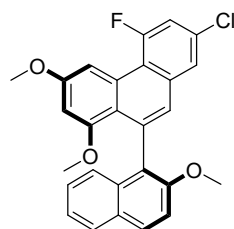

(R)-3a

≡

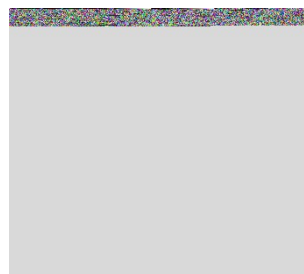

CCDC 1923394

Identification code 3a-cif

Empirical formula C<sub>27</sub>H<sub>20</sub>ClFO<sub>3</sub>

Formula weight 446.88

Temperature/K 295(2)

Crystal system triclinic

Space group P1

a/Å 12.4631(3)

b/Å 12.5987(3)

c/Å 15.6878(4)

α/° 97.484(2)

β/° 106.179(2)

γ/° 105.721(2)

Volume/Å<sup>3</sup> 2220.12(11)

Z 4

ρ<sub>calc</sub>/cm<sup>3</sup> 1.337

μ/mm 1 0.207

F(000) 928.0

Crystal size/mm<sup>3</sup> 0.3 × 0.26 × 0.25

Radiation MoKα (λ = 0.71073)

2θ range for data collection/° 6.666 to 52.742

Index ranges -15 ≤ h ≤ 15, -15 ≤ k ≤ 15, -19 ≤ l ≤ 19

Reflections collected 35999

Independent reflections 17912 [R<sub>int</sub> = 0.0206, R<sub>sigma</sub> = 0.0349]

Data/restraints/parameters 17912/13/1165

Goodness-of-fit on F<sup>2</sup> 1.028

Final R indexes [I ≥ 2σ (I)] R<sub>1</sub> = 0.0631, wR<sub>2</sub> = 0.1559

Final R indexes [all data] R<sub>1</sub> = 0.0984, wR<sub>2</sub> = 0.1835

Largest diff. peak/hole / e Å<sup>-3</sup> 0.46/-0.34

Flack parameter 0.019(17)

### XIII. Reference

- (1) Jia, S.; Chen, Z.; Zhang, N.; Tan, Y.; Liu, Y.; Deng, J.; Yan, H. Organocatalytic Enantioselective Construction of Axially Chiral Sulfone-Containing Styrenes. *J. Am. Chem. Soc.* **2018**, *140*, 7056.
- (2) Wang, X.; Han, X.; Zhang, J.; Wu, X.; Liu, Y.; Cui, Y. Homochiral 2D Porous Covalent Organic Frameworks for Heterogeneous Asymmetric Catalysis. *J. Am. Chem. Soc.* **2016**, *138*, 12332.
- (3) Shi, X.; Kiesman, W. F.; Levina, A.; Xin, Z. Catalytic Asymmetric Petasis Reactions of Vinylboronates. *J. Org. Chem.* **2013**, *78*, 9415.
- (4) Yang, B.; Li, G.; Zhang, X.; Shu, X.; Wang, A.; Zhu, X.; Zhu, J. Hg<sup>2+</sup> Detection by Aniline-Based Conjugated Copolymers with High Selectivity. *Polymer.* **2011**, *52*, 2537.
